# Supplementary material for: Synthesis of artemisinic acid derived glycoconjugates and their anticancer studies
Source: Royal Society of Chemistry journal article supplement (doi:10.1039/d0ob00216j), 2020-01-01

## Supporting Information

### Synthesis of artemisinic acid derived glycoconjugates and their anticancer studies

Tharun K. Kotammagari,<sup>a,b</sup> Sayantan Paul,<sup>a,b</sup> Ganesh K. Barik,<sup>c</sup> Manas K. Santra<sup>c</sup>  
and Asish K. Bhattacharya\*<sup>a,b</sup>

<sup>a</sup>Division of Organic Chemistry, CSIR-National Chemical Laboratory (CSIR-NCL),  
Dr Homi Bhabha Road, Pune-41108, India.

E-mail: [ak.bhattacharya@ncl.res.in](mailto:ak.bhattacharya@ncl.res.in)

<sup>b</sup>Academy of Scientific and Innovative Research (AcSIR), CSIR-NCL, Pune-411 008, India

<sup>c</sup>Cancer Biology Division, National Centre for Cell Sciences,  
Ganeshkhind Road, Pune-411 007, India

#### Contents:

<sup>1</sup>H, <sup>13</sup>C NMR and HRMS spectra of all the synthesized compounds

**Spectra**  
**<sup>1</sup>H NMR (500 MHz, CDCl<sub>3</sub>) of compound 4**

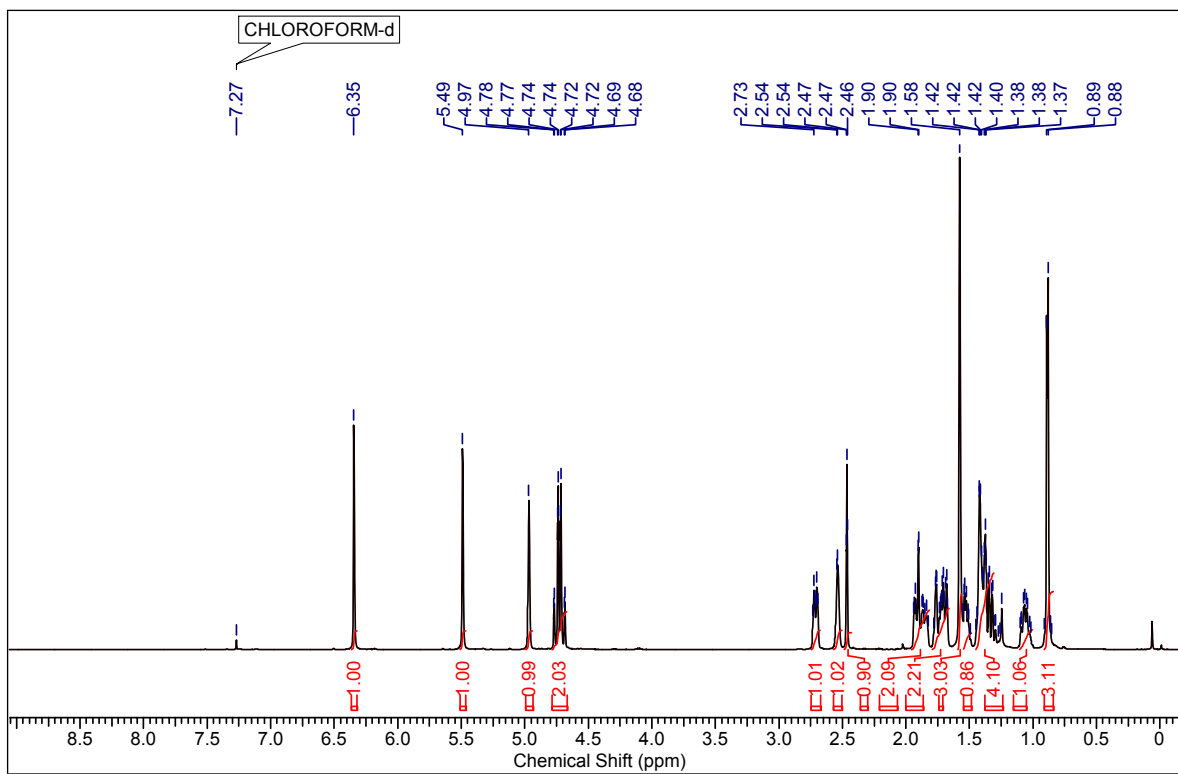

**<sup>13</sup>C NMR (125 MHz, CDCl<sub>3</sub>) of compound 4**

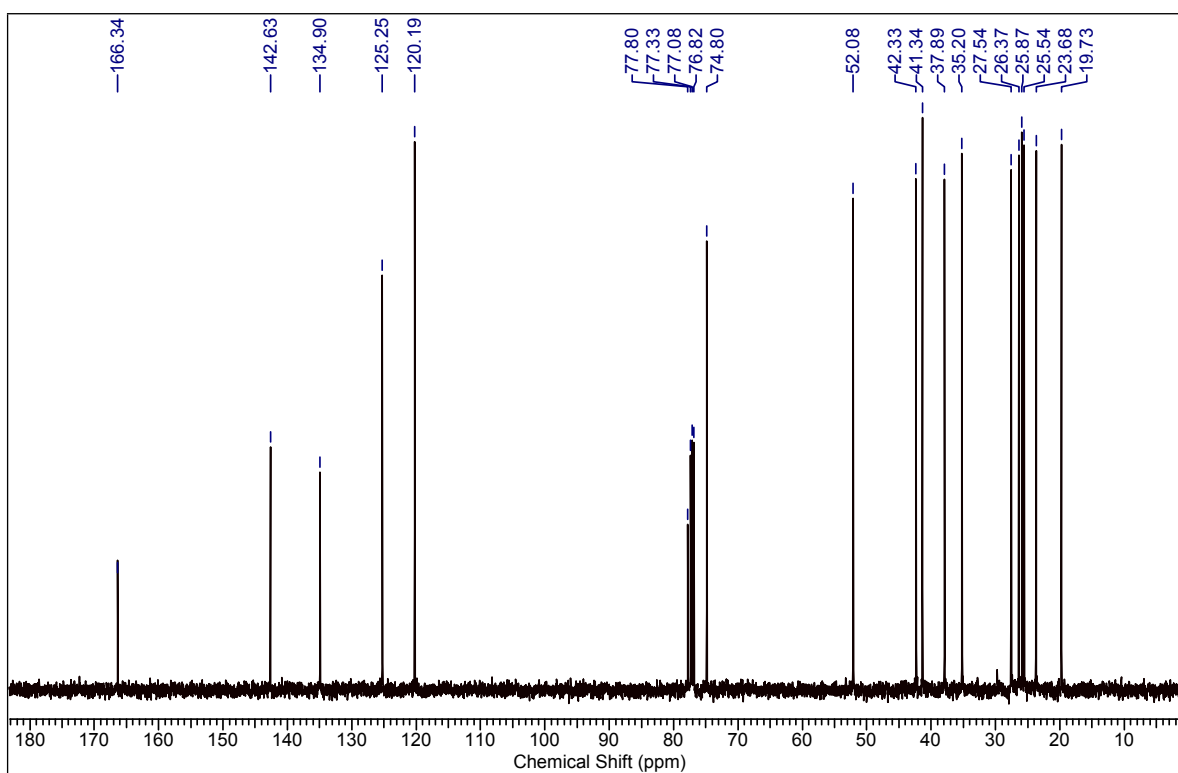

# HRMS of 4

AA-1\_171124161135#367 RT: 1.64 AV: 1 NL: 9.62E7  
T: FTMS + p ESI Full ms [100.0000-1500.0000]

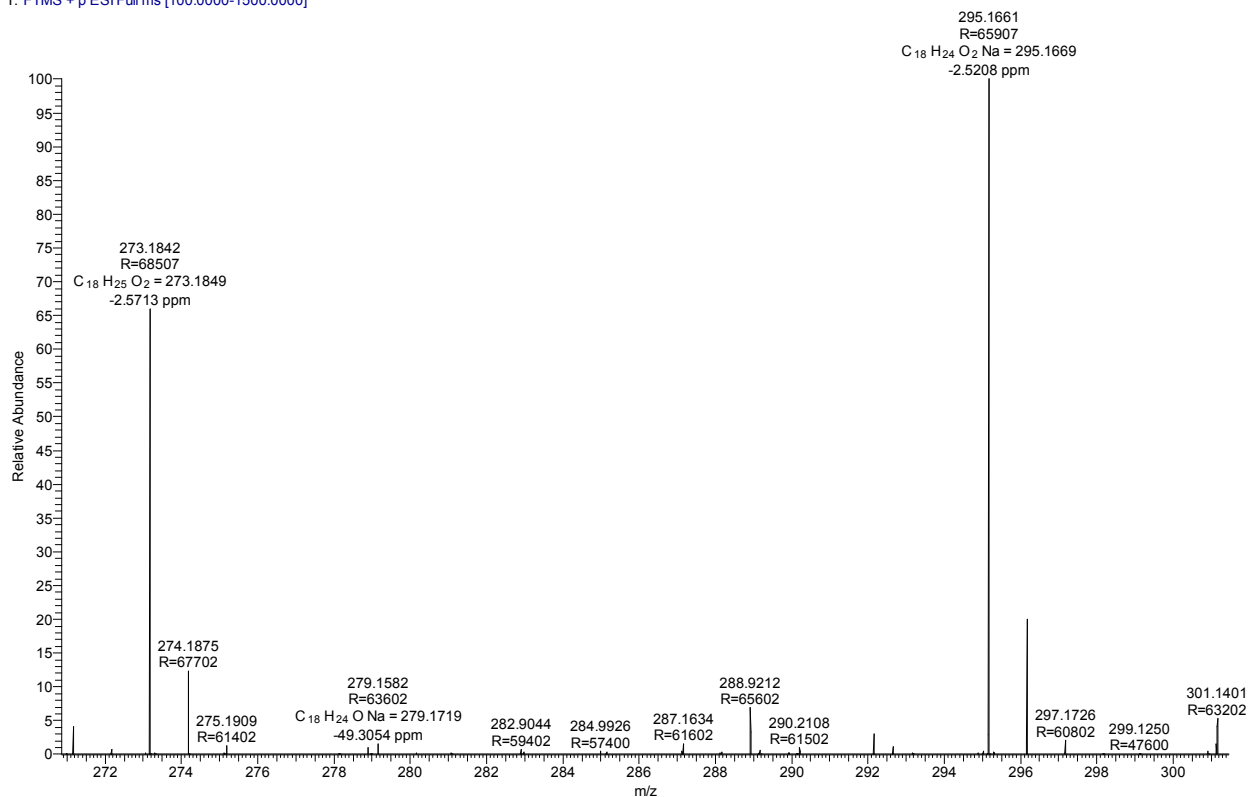

# <sup>1</sup>H NMR (400 MHz, CDCl<sub>3</sub>) of compound 7a

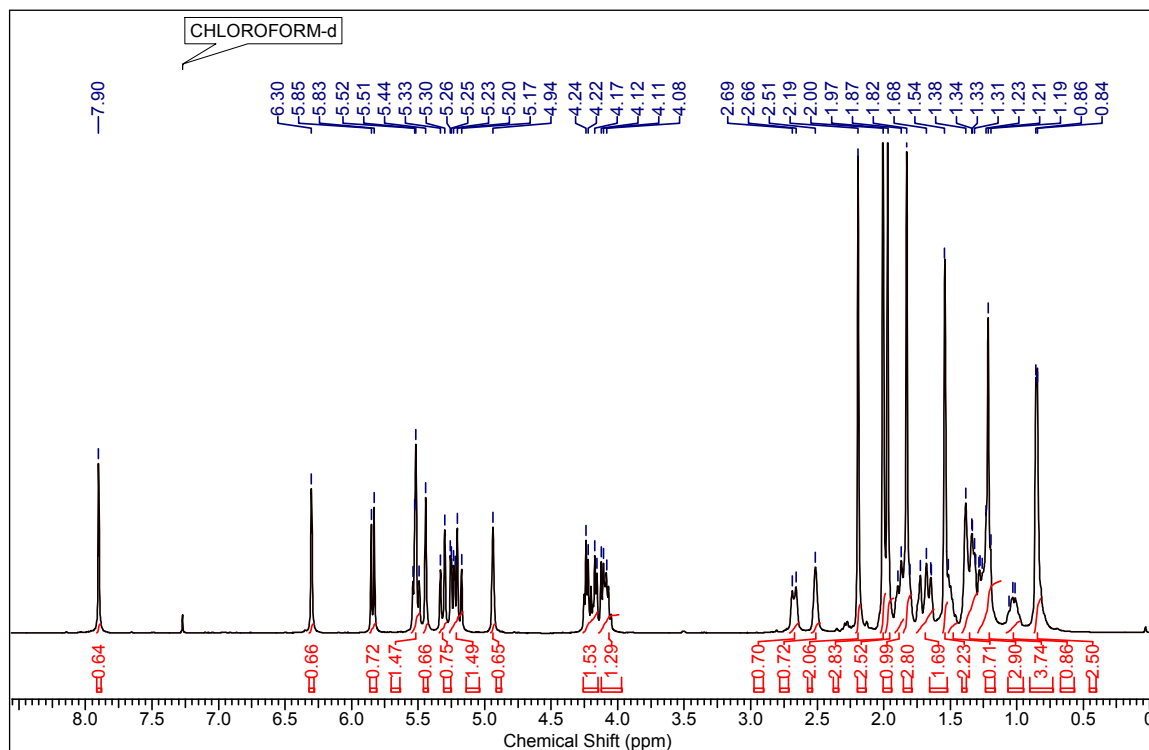

### <sup>13</sup>C NMR (100 MHz, CDCl<sub>3</sub>) of compound 7a

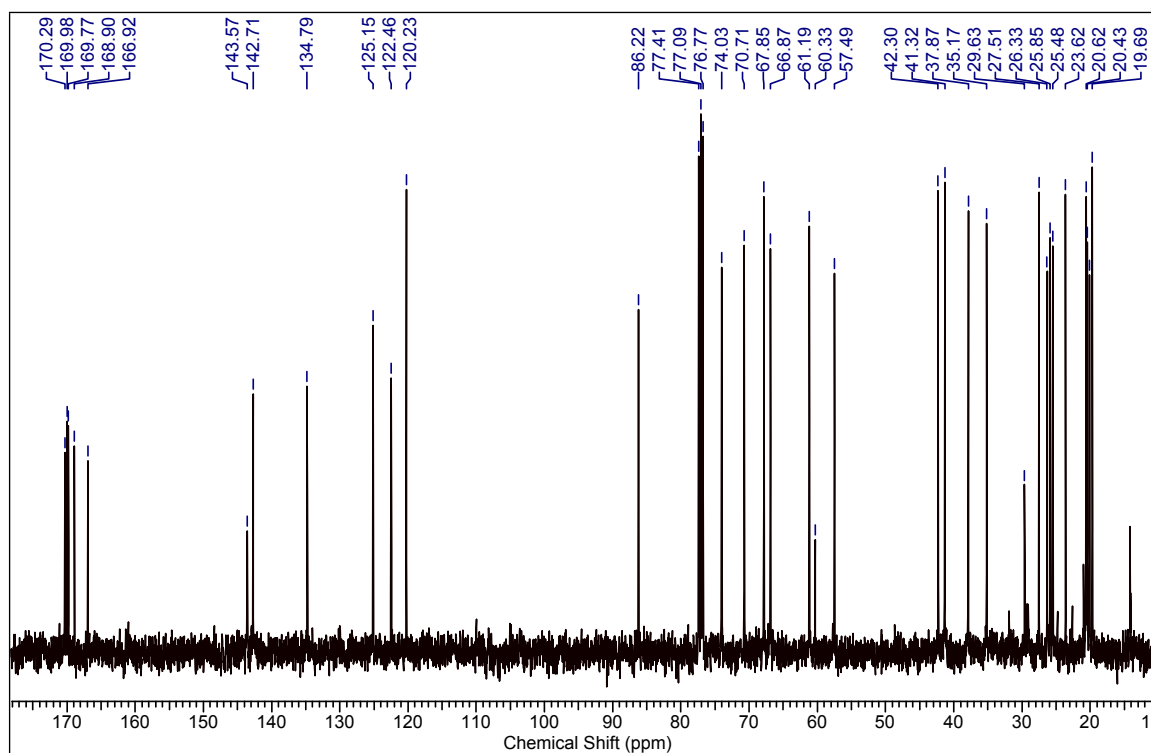

### HRMS of 7a

AA-2\_171124165538 #303 RT: 1.35 AV: 1 NL: 3.34E9  
T: FTMS + p ESI Full ms [100.0000-1500.0000]

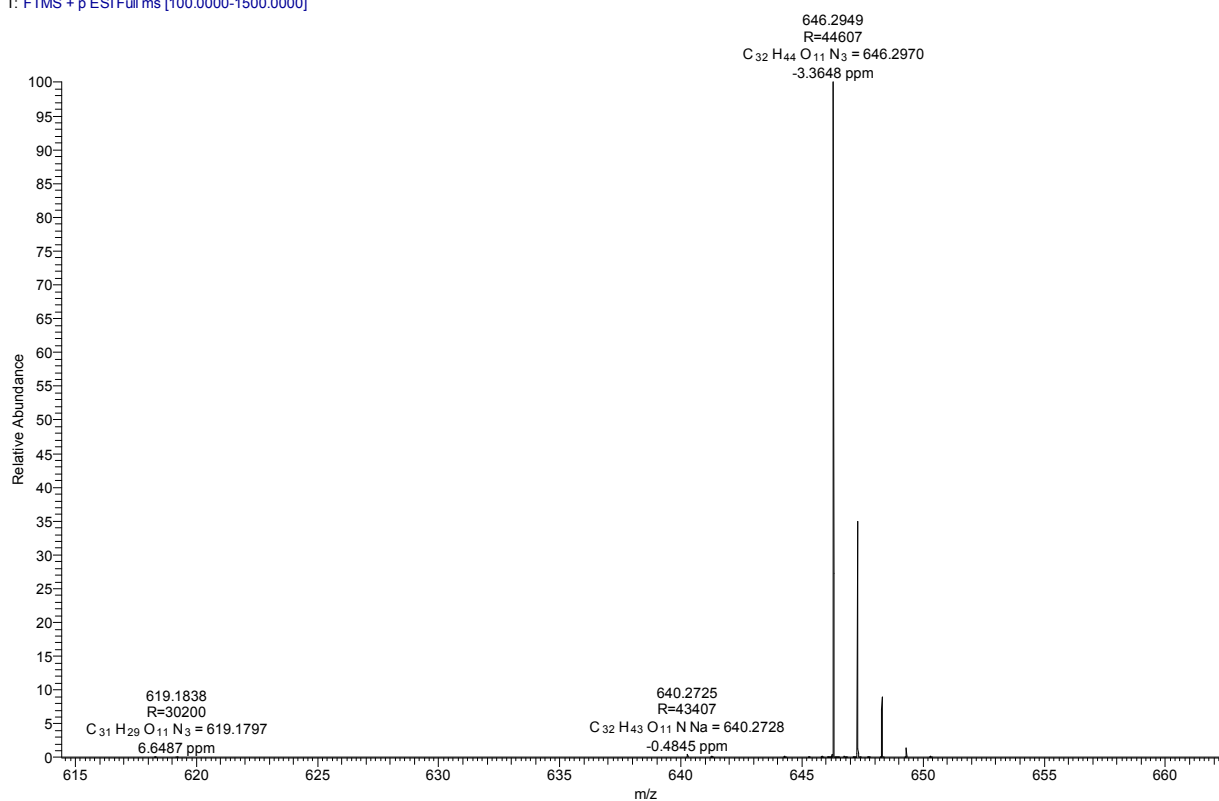

### <sup>1</sup>H NMR (500 MHz, CDCl<sub>3</sub>) of compound 7b

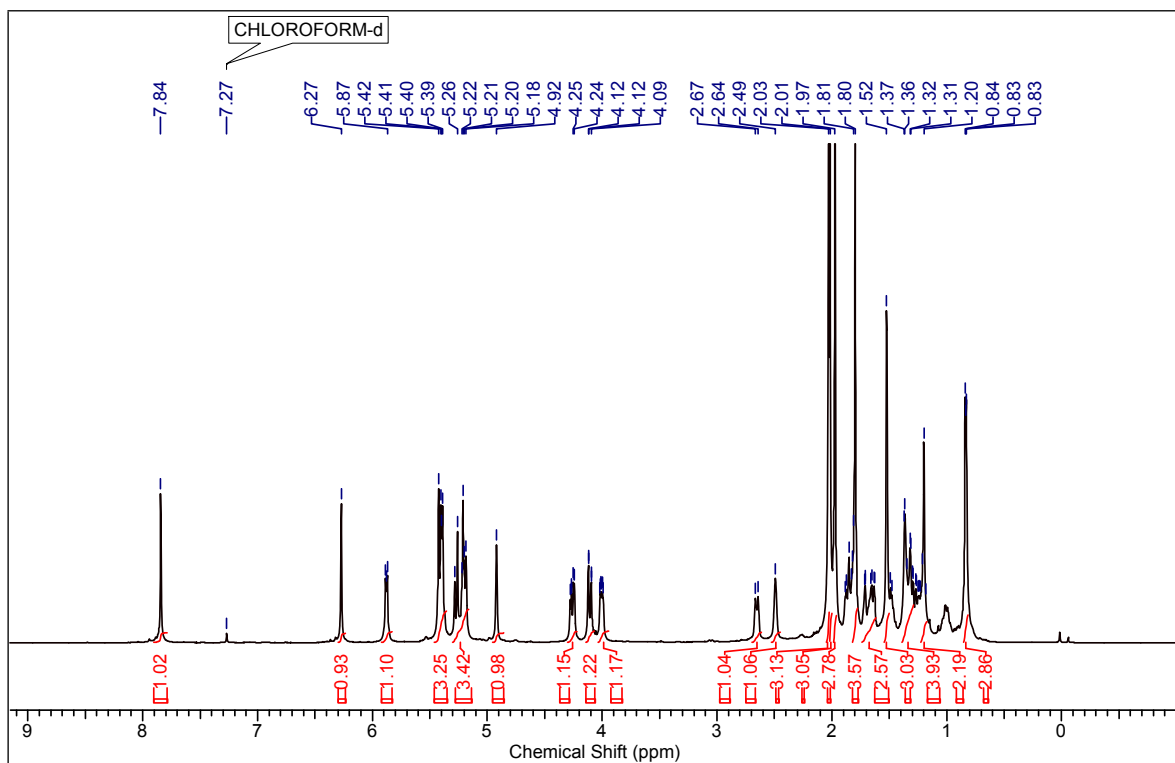

### <sup>13</sup>C NMR (125 MHz, CDCl<sub>3</sub>) of compound 7b

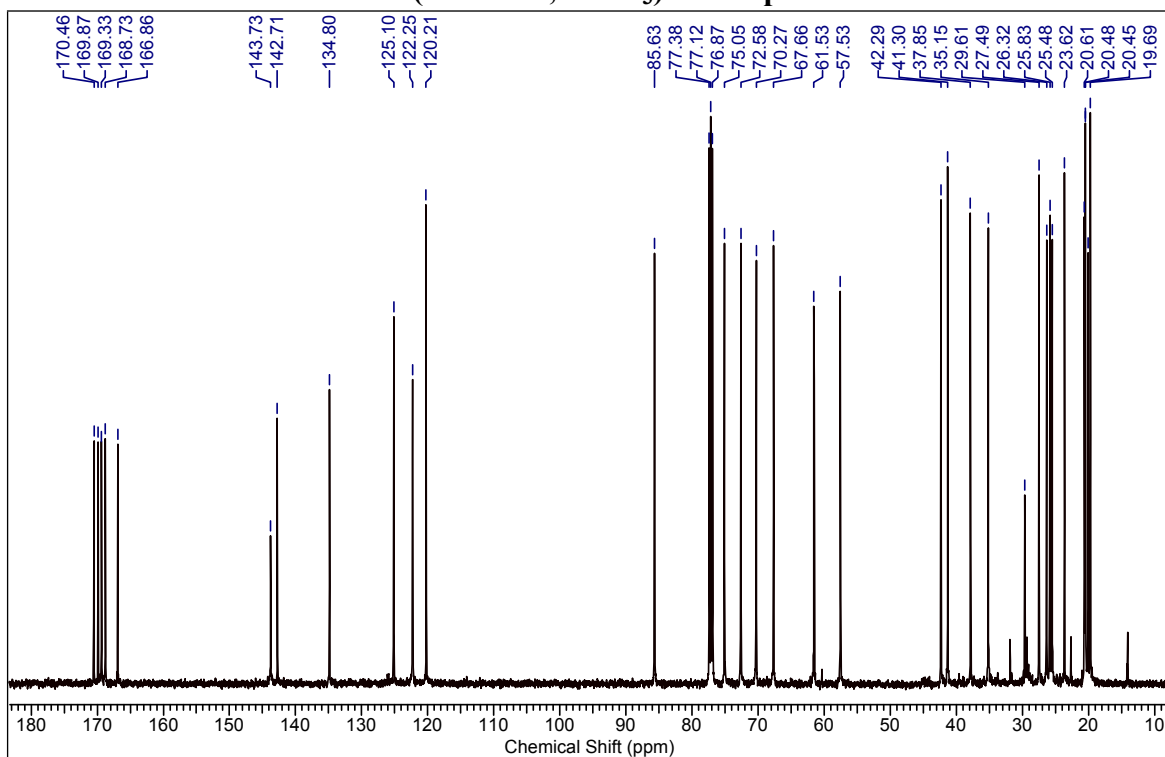

## HRMS of 7b

AA-3 #305 RT: 1.36 AV: 1 NL: 3.05E9  
T: FTMS + p ESI Full ms [100.0000-1500.0000]

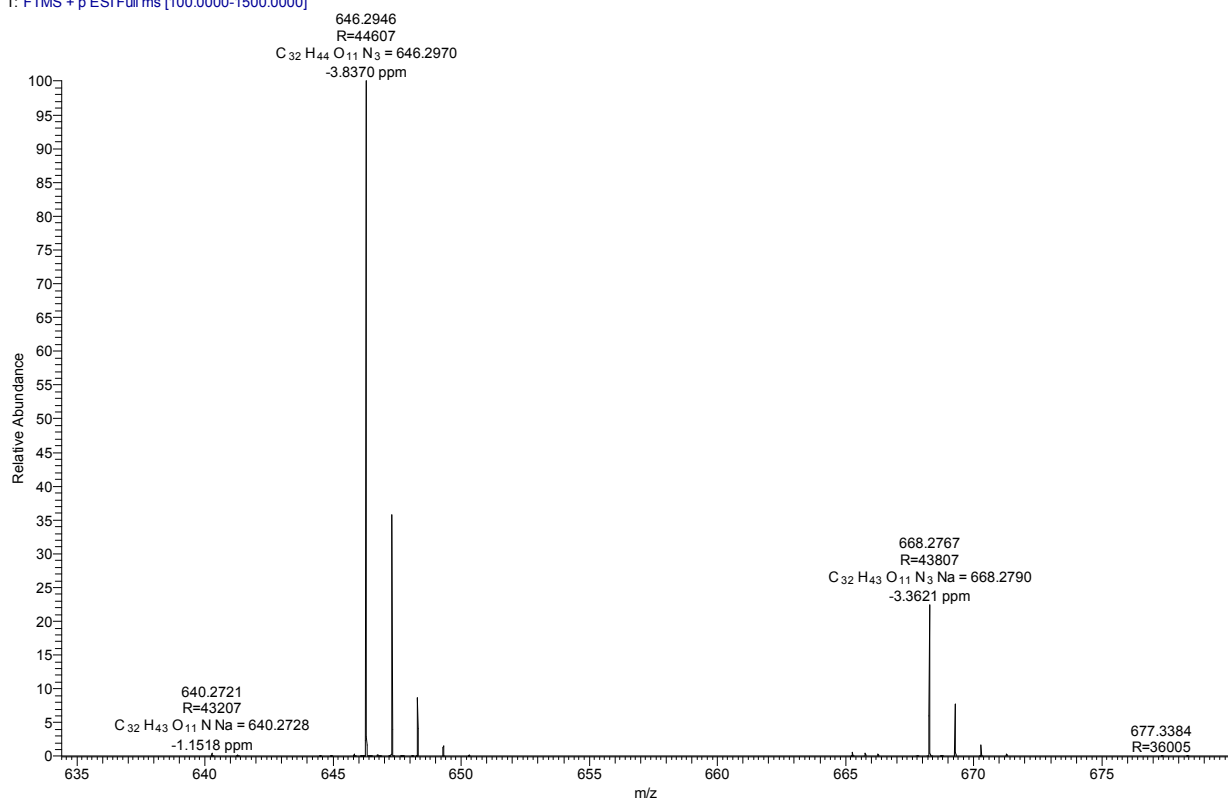

## <sup>1</sup>H NMR (400 MHz, CDCl<sub>3</sub>) of compound 7c

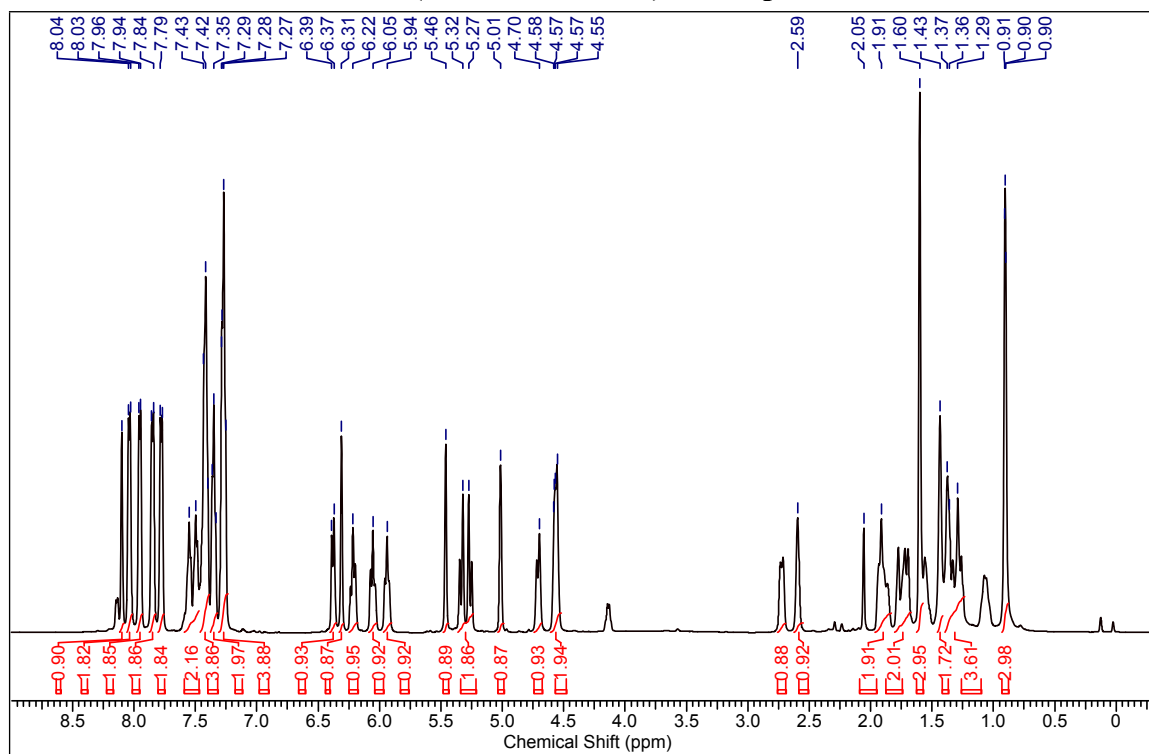

### <sup>13</sup>C NMR (100 MHz, CDCl<sub>3</sub>) of compound 7c

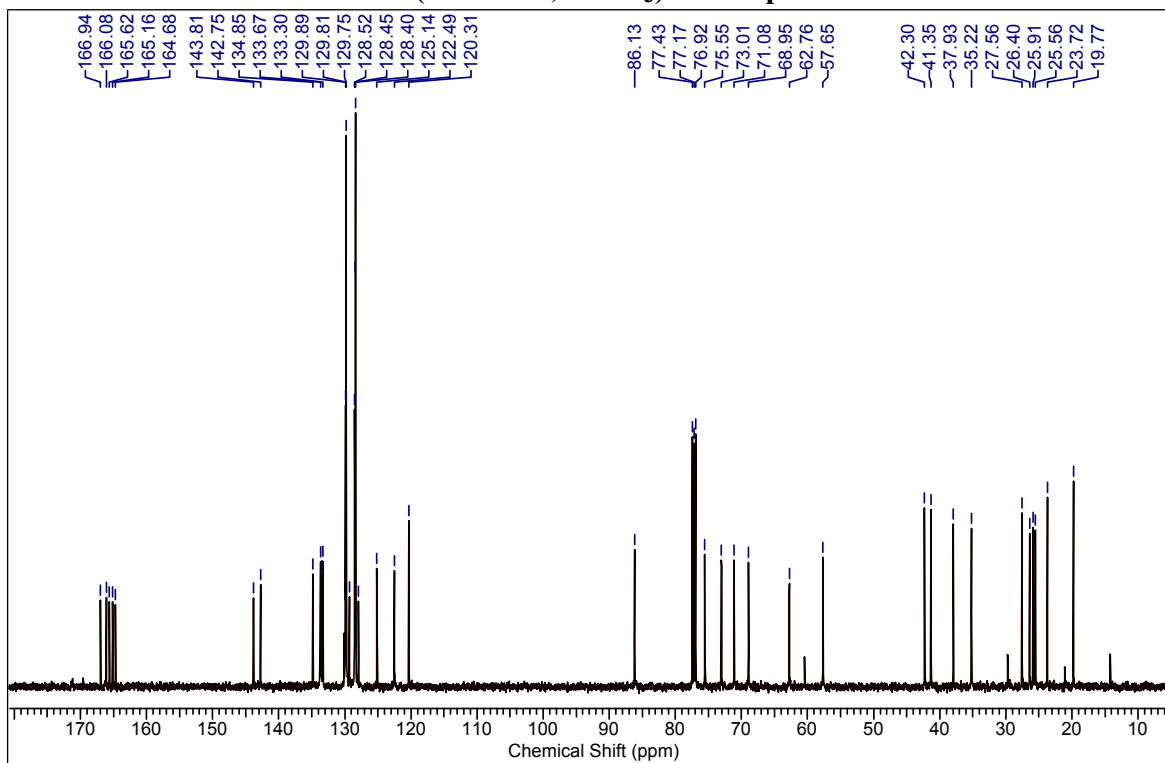

### HRMS of 7c

AA-5 #430 RT: 1.92 AV: 1 NL: 2.95E7  
T: FTMS + p ESI Full ms [100.0000-1500.0000]

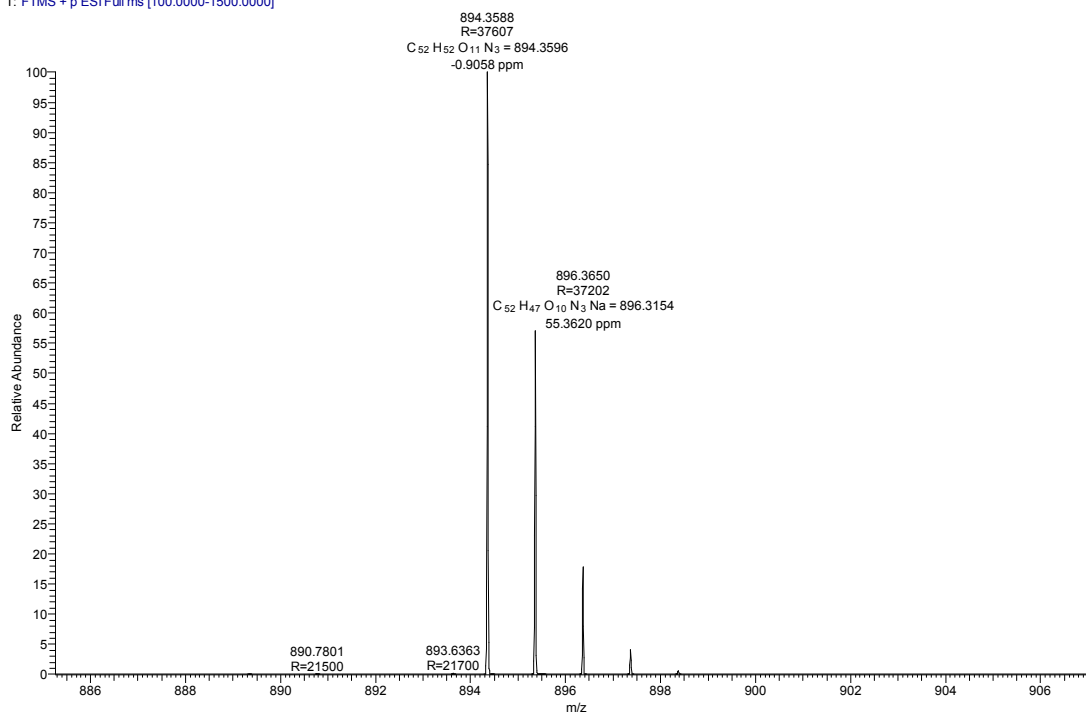

**<sup>1</sup>H NMR (400 MHz, CDCl<sub>3</sub>) of compound 7d**

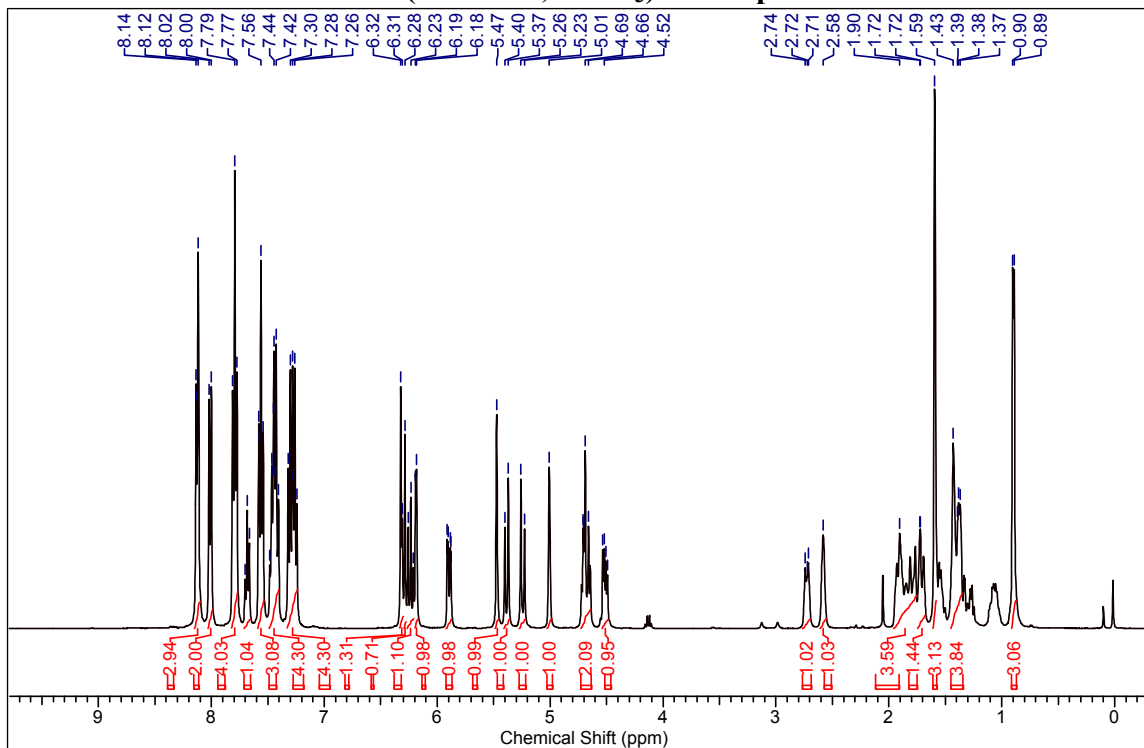

**<sup>13</sup>C NMR (100 MHz, CDCl<sub>3</sub>) of compound 7d**

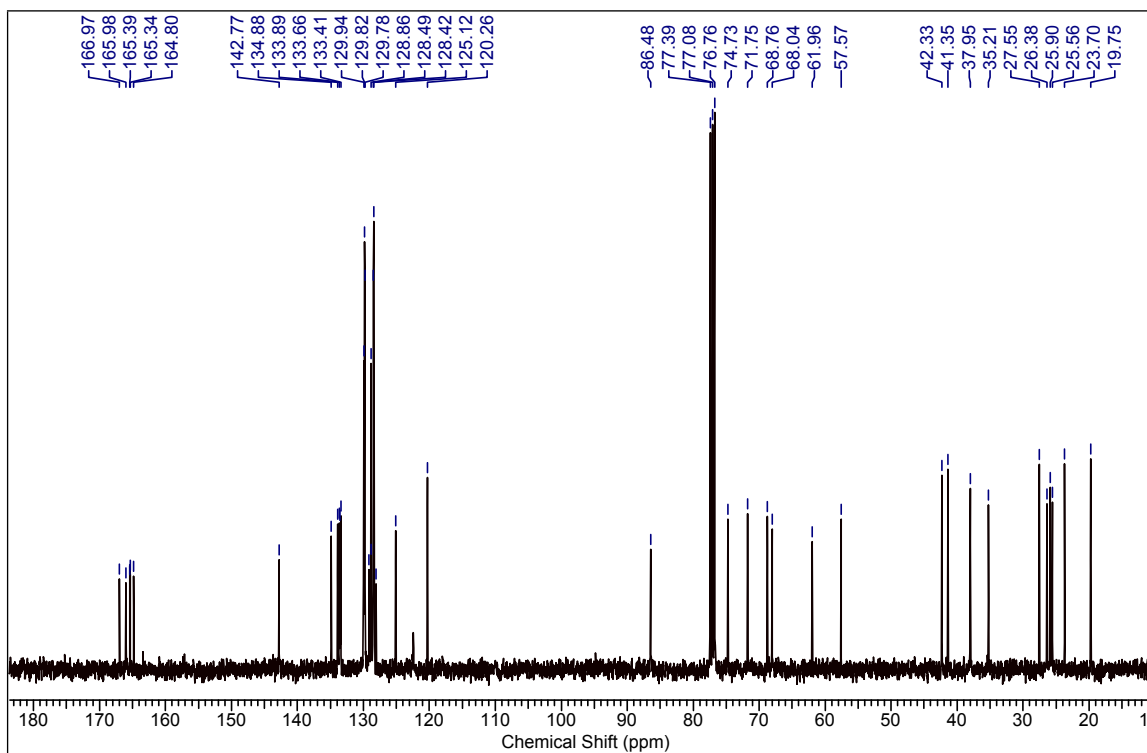



# HRMS of 7d

AA-6 #432 RT: 1.93 AV: 1 NL: 1.40E8  
T: FTMS + p ESI Full ms [100.0000-1500.0000]

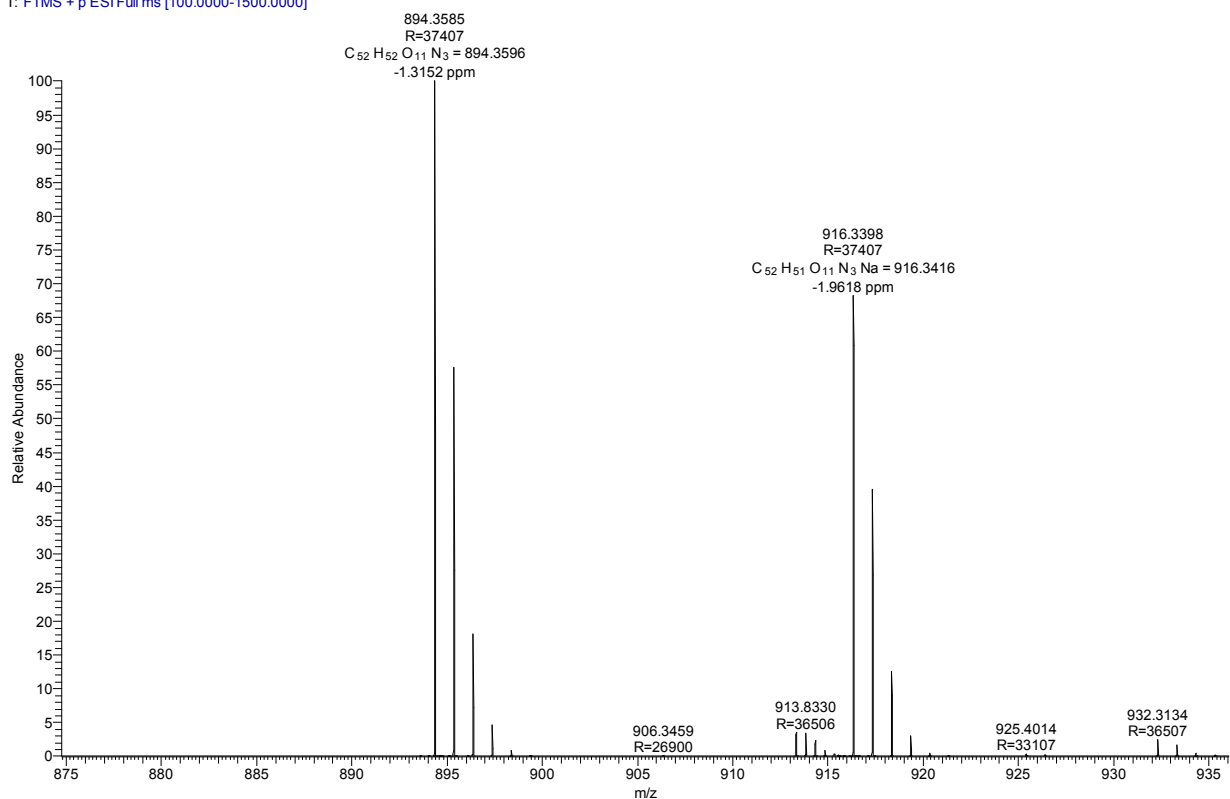

# <sup>1</sup>H NMR (400 MHz, CDCl<sub>3</sub>) of compound 7e

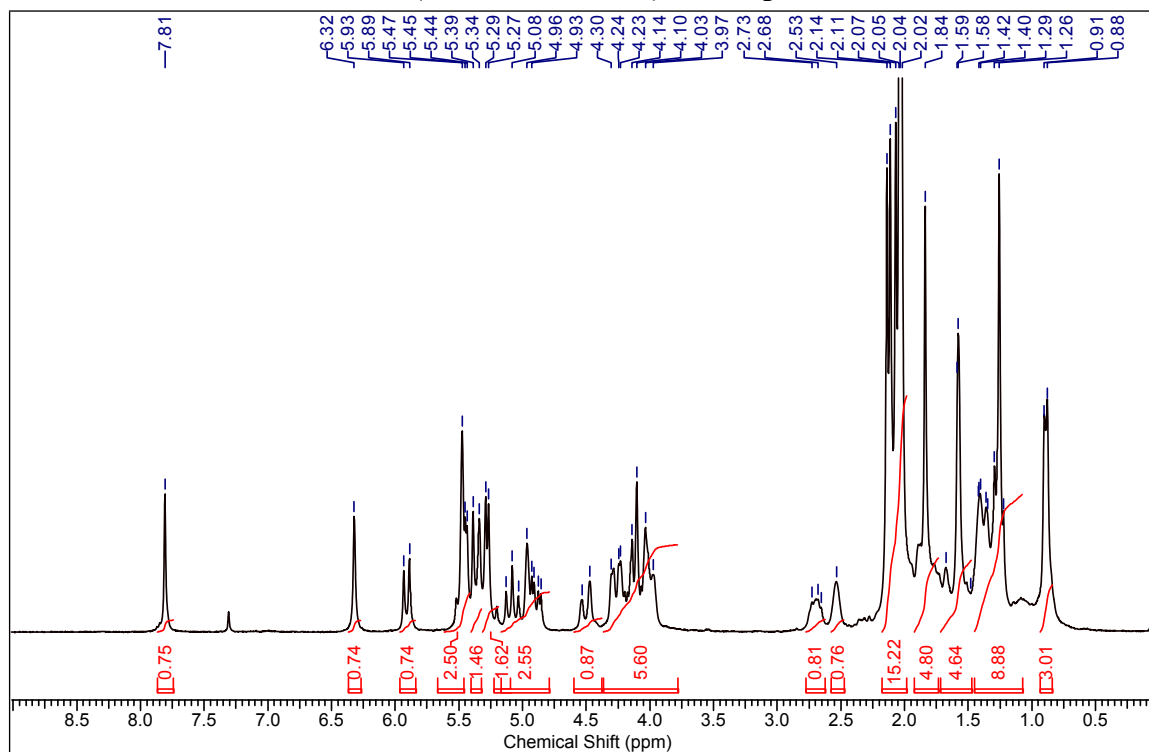

### <sup>13</sup>C NMR (100 MHz, CDCl<sub>3</sub>) of compound 7e

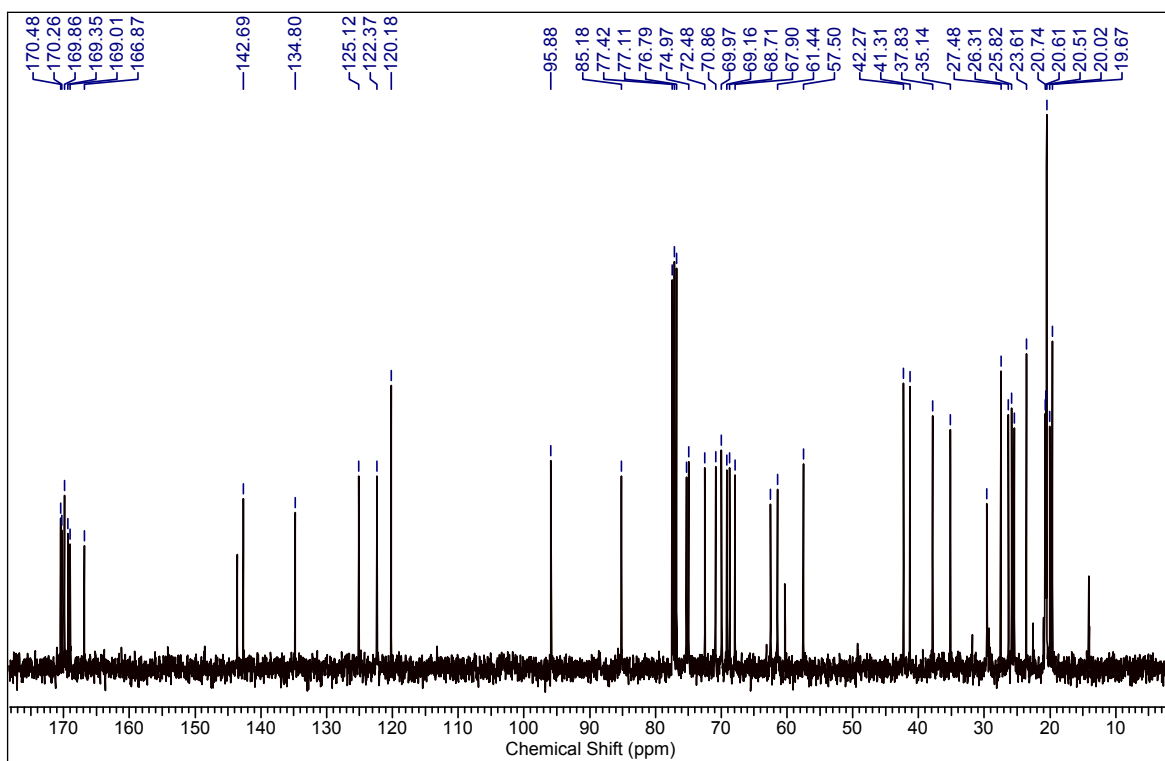

### HRMS of 7e

AA-4 #311 RT: 1.38 AV: 1 NL: 9.29E8  
T: FTMS + p ESI Full ms [100.0000-1500.0000]

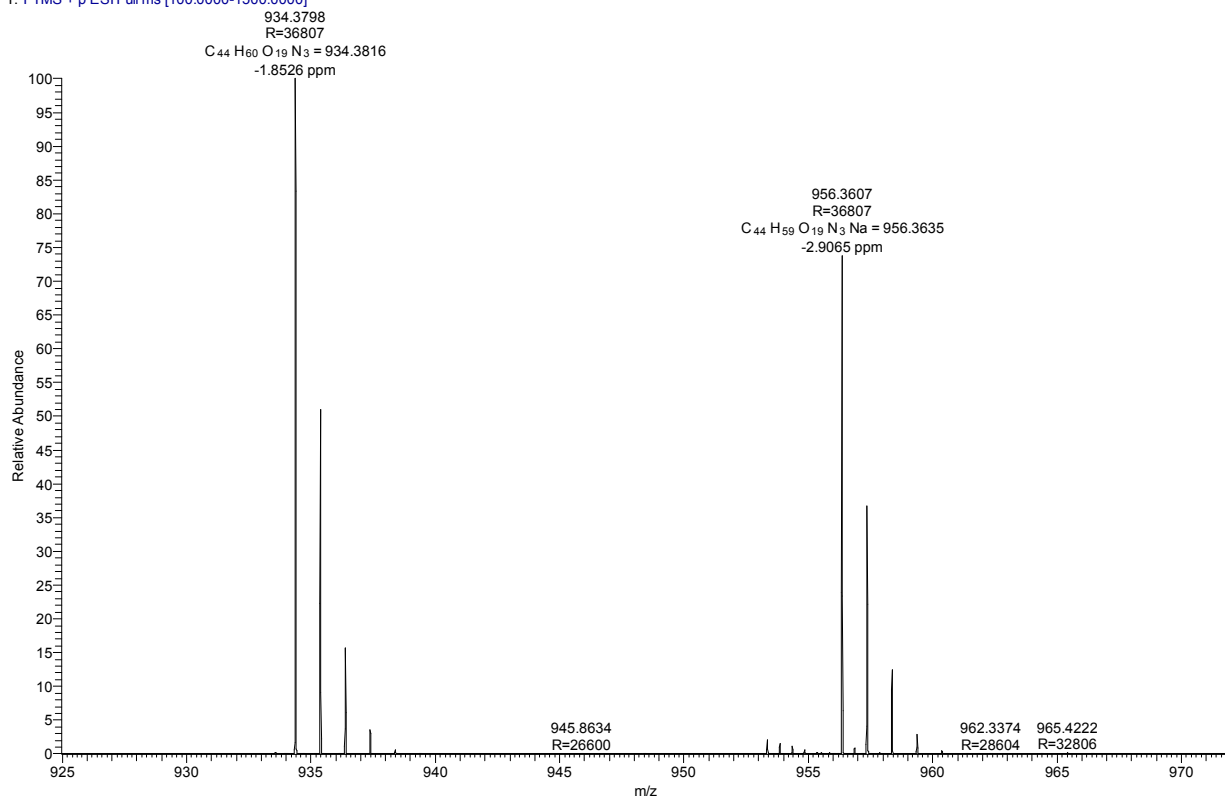

### <sup>1</sup>H NMR (400 MHz, CDCl<sub>3</sub>) of compound 7f

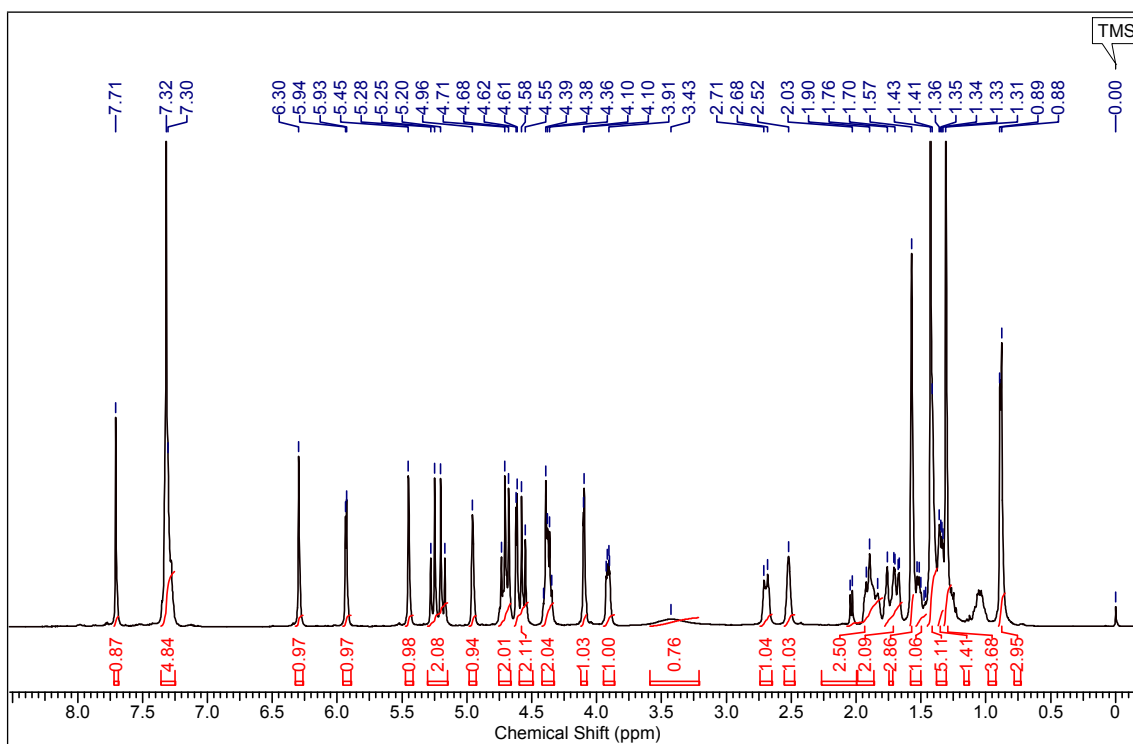

### <sup>13</sup>C NMR (100 MHz, CDCl<sub>3</sub>) of compound 7f

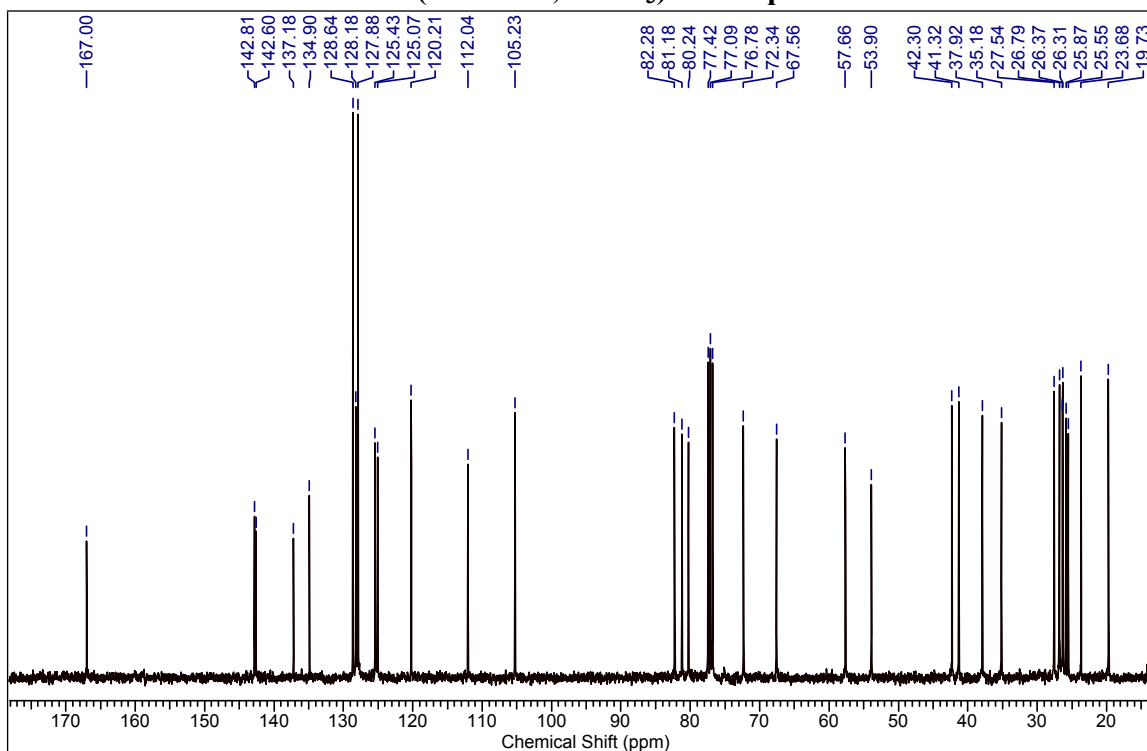

# HRMS of 7f

AA-10 #345 RT: 1.54 AV: 1 NL: 2.09E9  
T: FTMS + p ESI Full ms [100.0000-1500.0000]

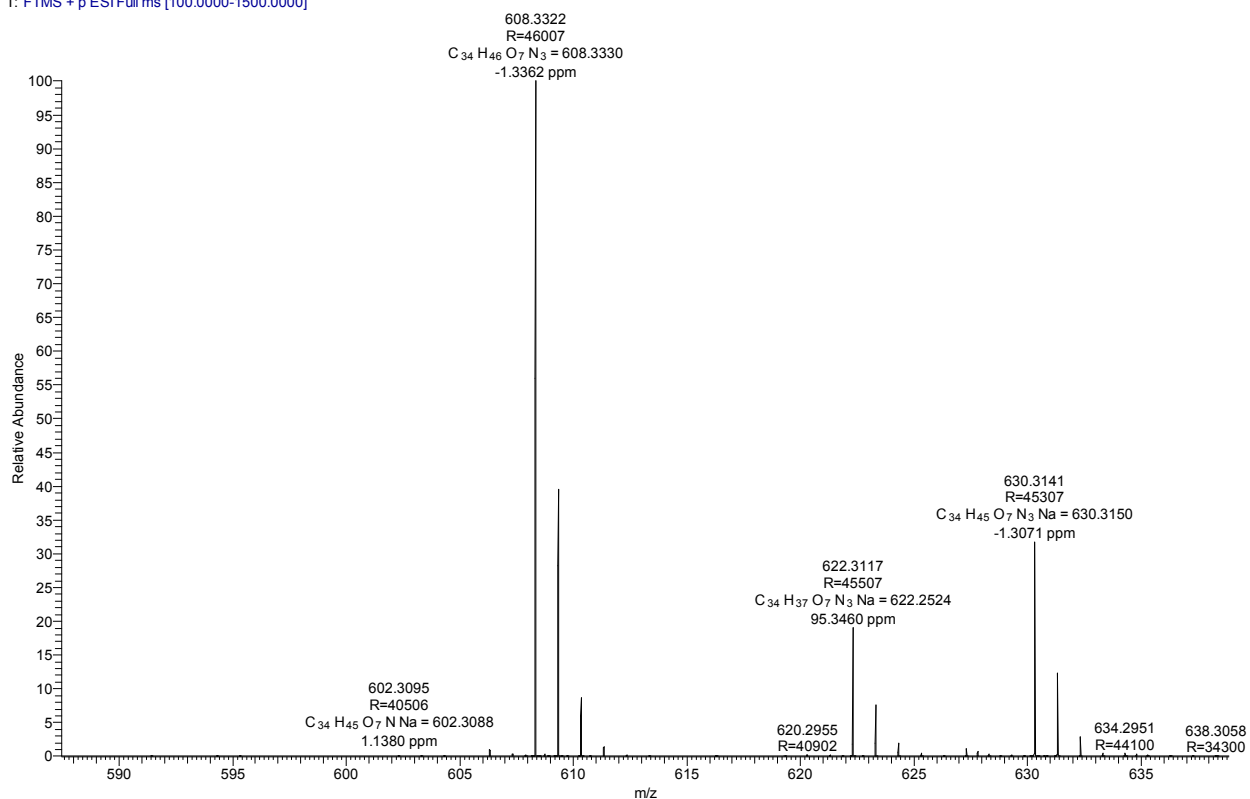

# <sup>1</sup>H NMR (400 MHz, CDCl<sub>3</sub>) of compound 7g

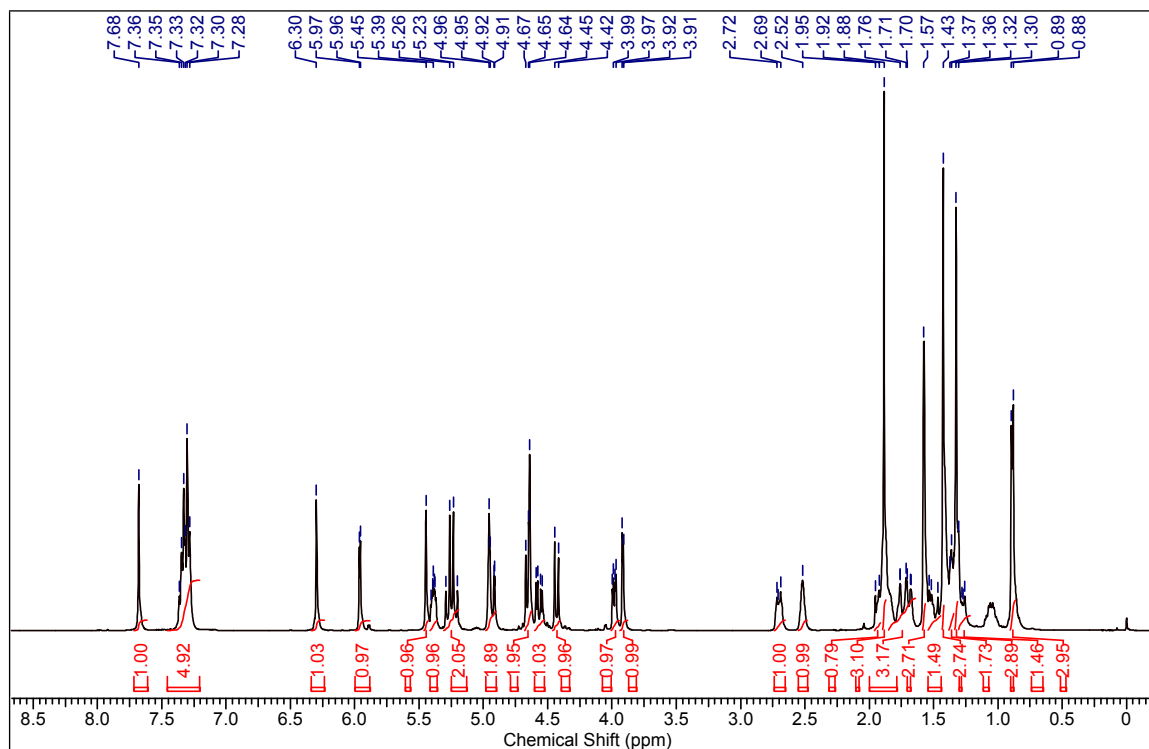

### $^{13}\text{C}$ NMR (100 MHz, $\text{CDCl}_3$ ) of compound 7g

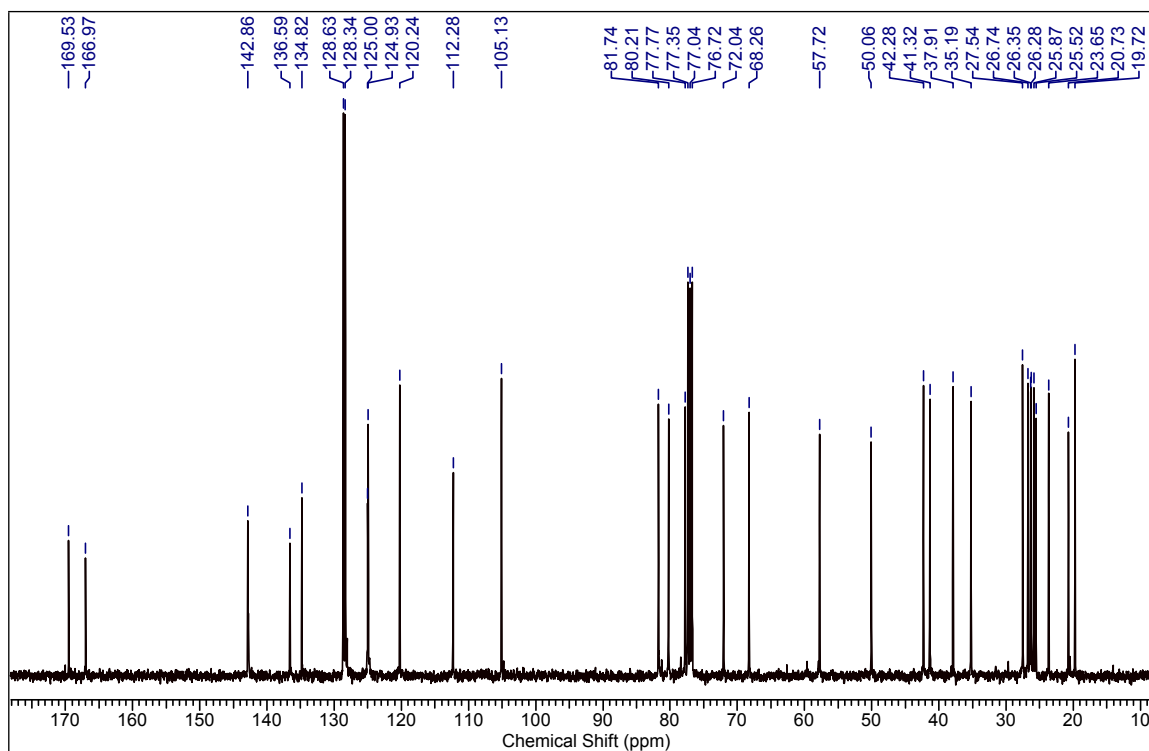

### HRMS of 7g

AA-11 #390 RT: 1.74 AV: 1 NL: 1.91E8  
T: FTMS + p ESI Full ms [100.0000-1500.0000]

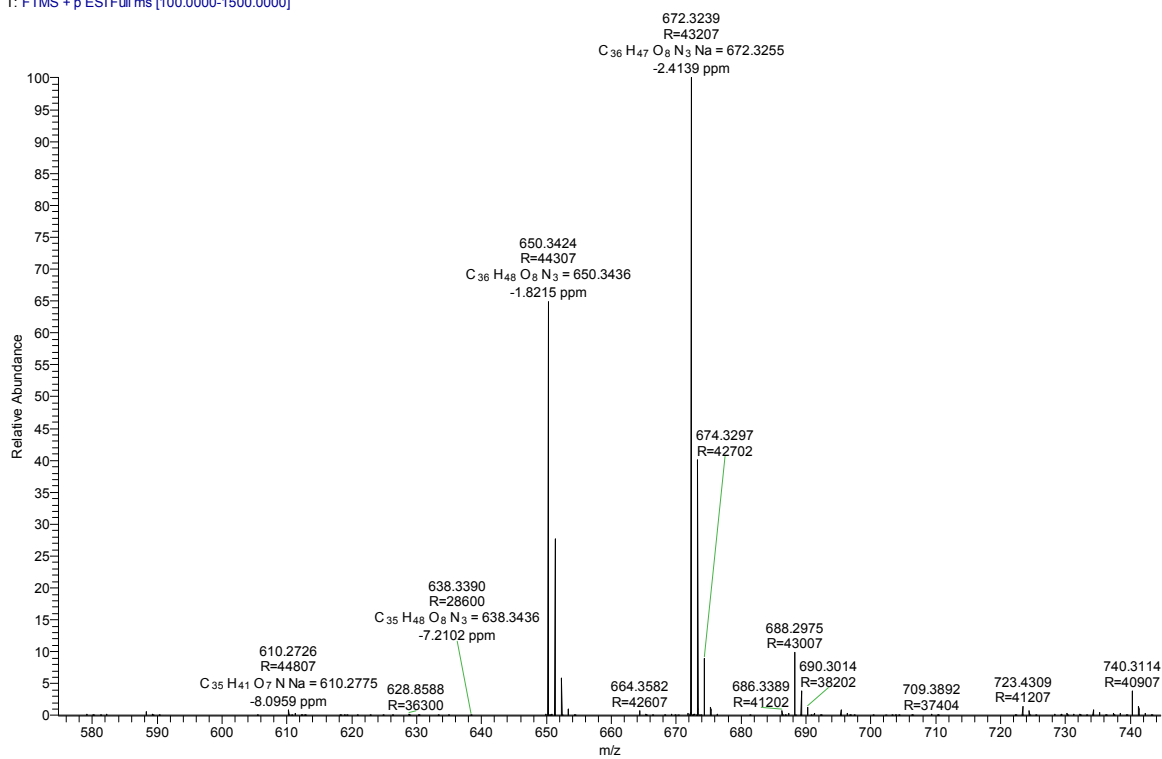

**<sup>1</sup>H NMR (500 MHz, CDCl<sub>3</sub>) of compound 7h**

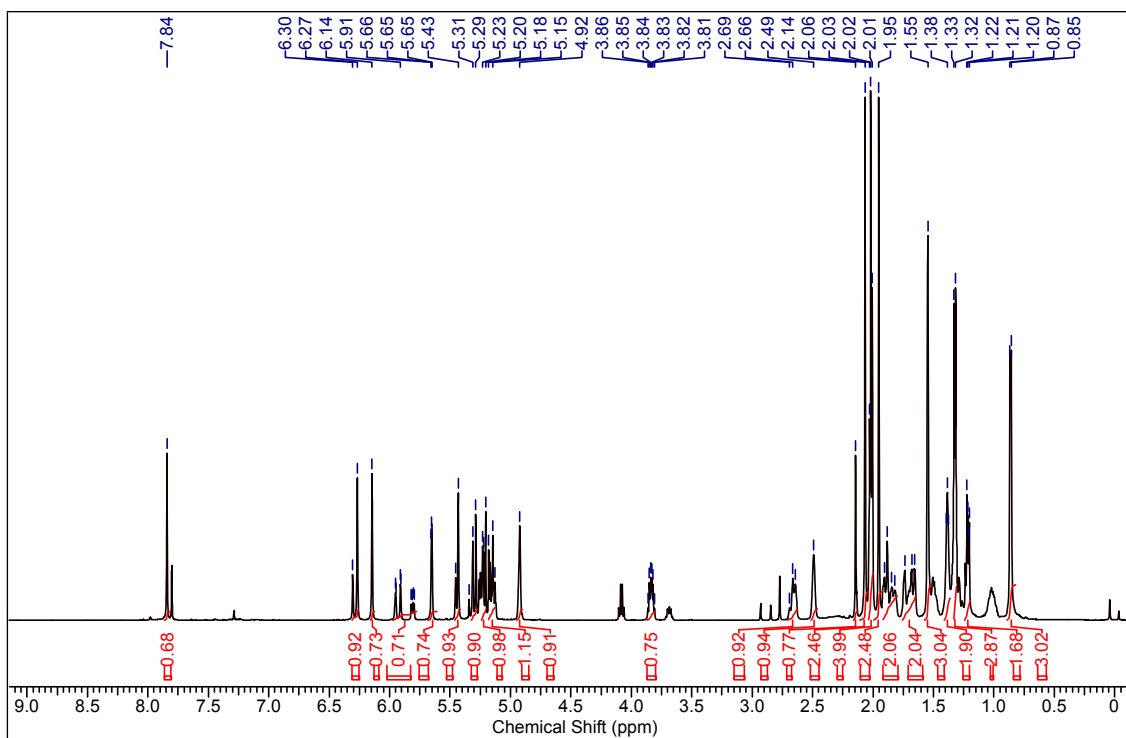

**<sup>13</sup>C NMR (125 MHz, CDCl<sub>3</sub>) of compound 7h**

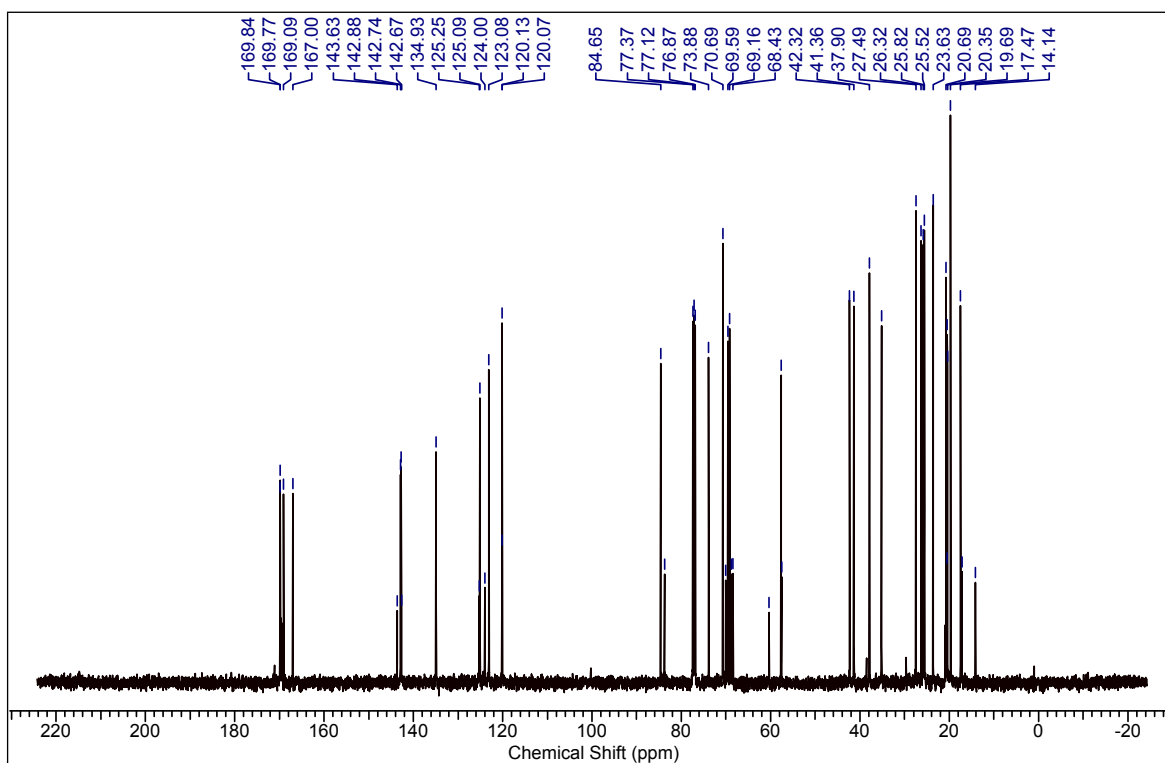

# HRMS of 7h

AA-7 #309 RT: 1.39 AV: 1 NL: 3.12E9  
T: FTMS + p ESI Full ms [100.0000-1500.0000]

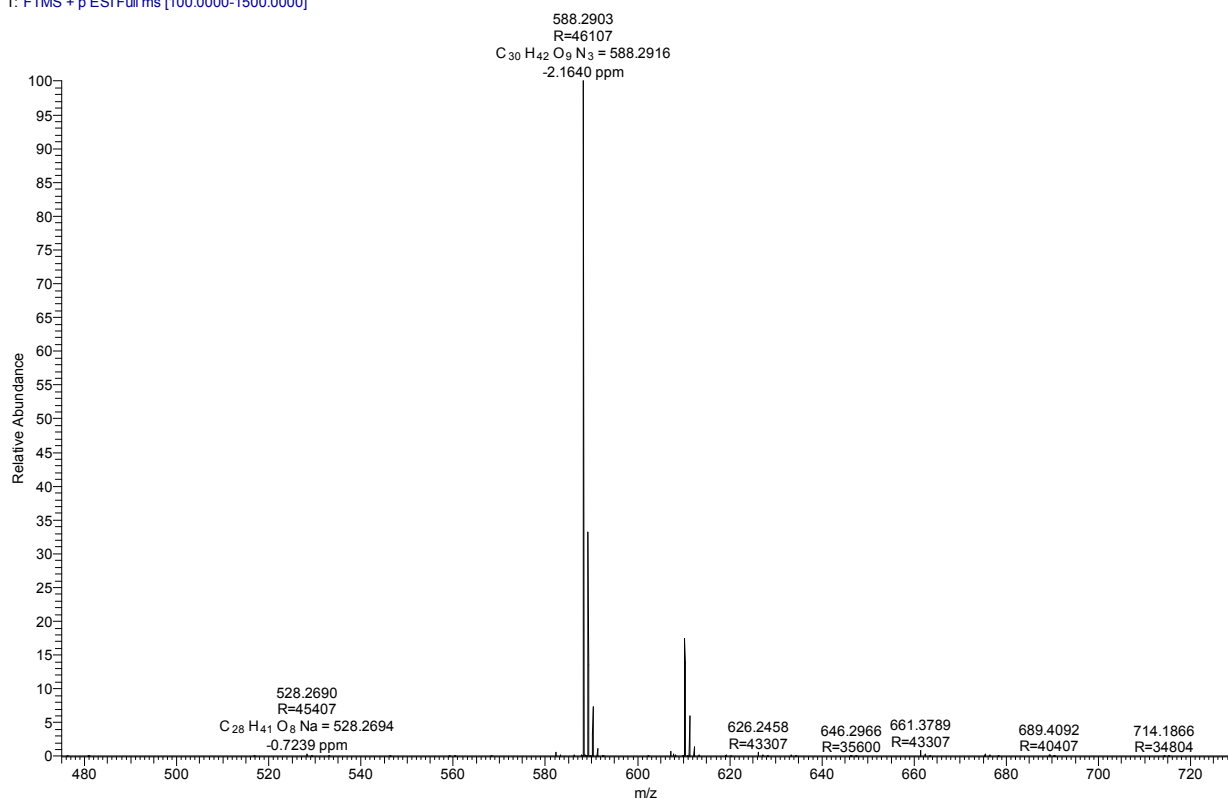

# <sup>1</sup>H NMR (400 MHz, CDCl<sub>3</sub>) of compound 7i

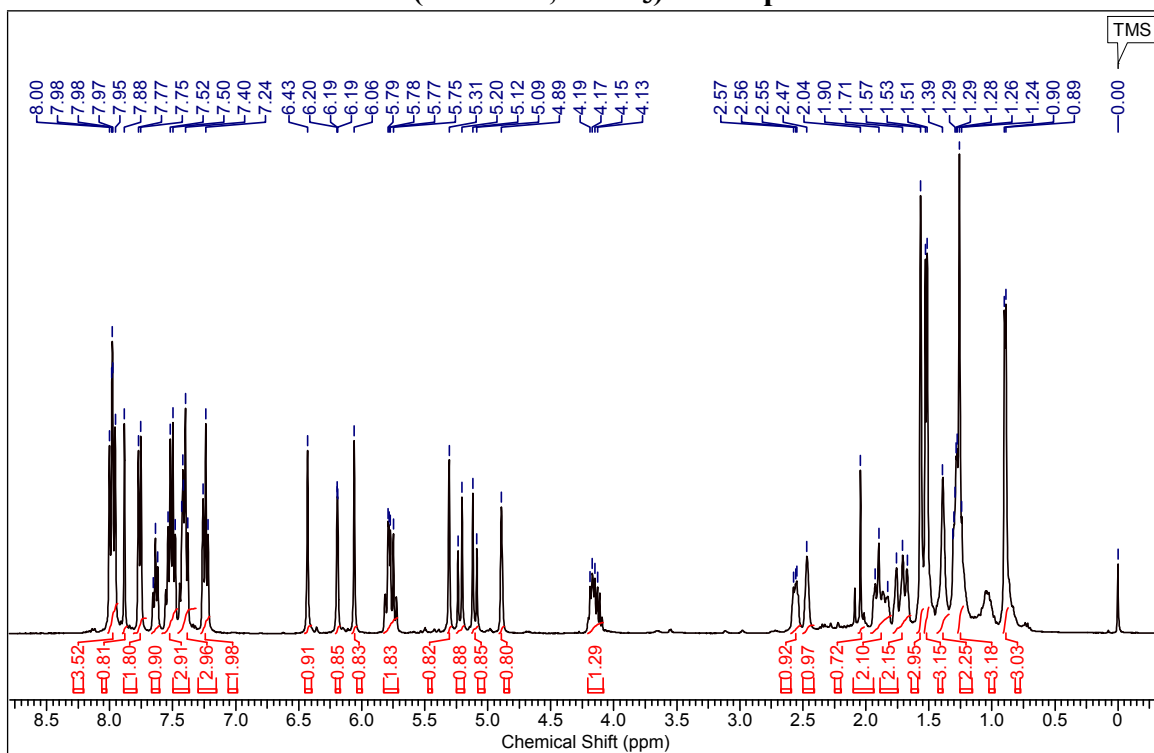

### <sup>13</sup>C NMR (100 MHz, CDCl<sub>3</sub>) of compound 7i

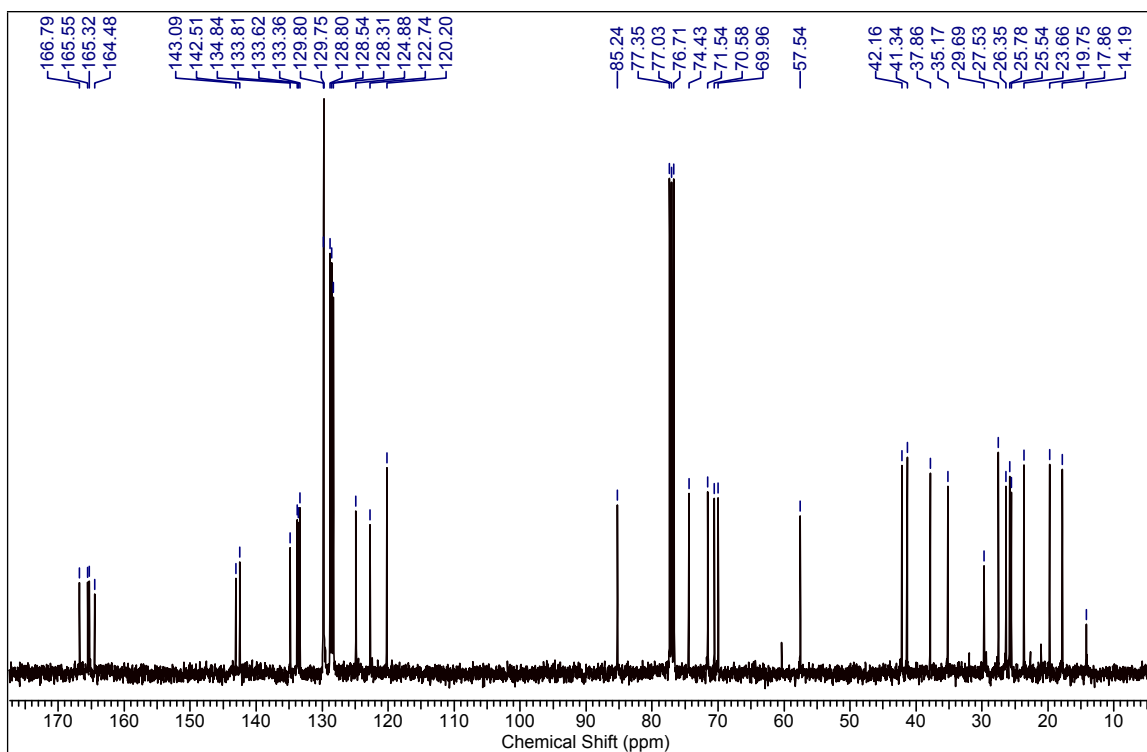

### HRMS of 7i

KTK-AA-8 #325 RT: 1.45 AV: 1 NL: 2.01E8  
T: FTMS + p ESI Full ms [100.00-1500.00]

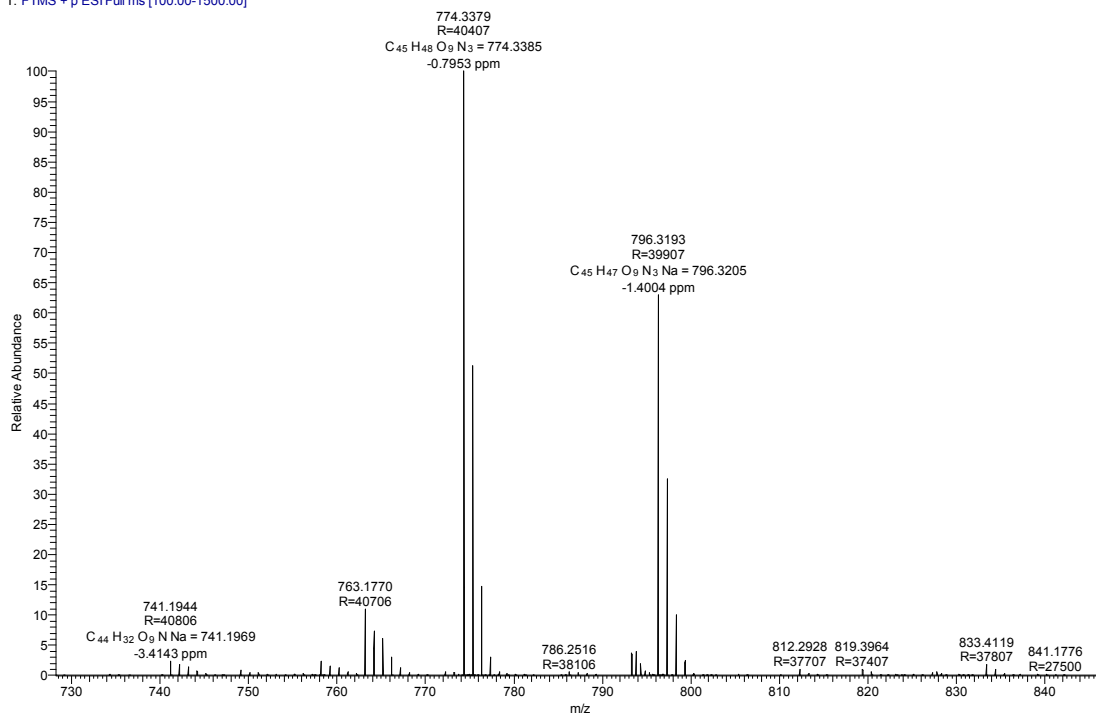



**<sup>1</sup>H NMR (400 MHz, CDCl<sub>3</sub>) of compound 7j**

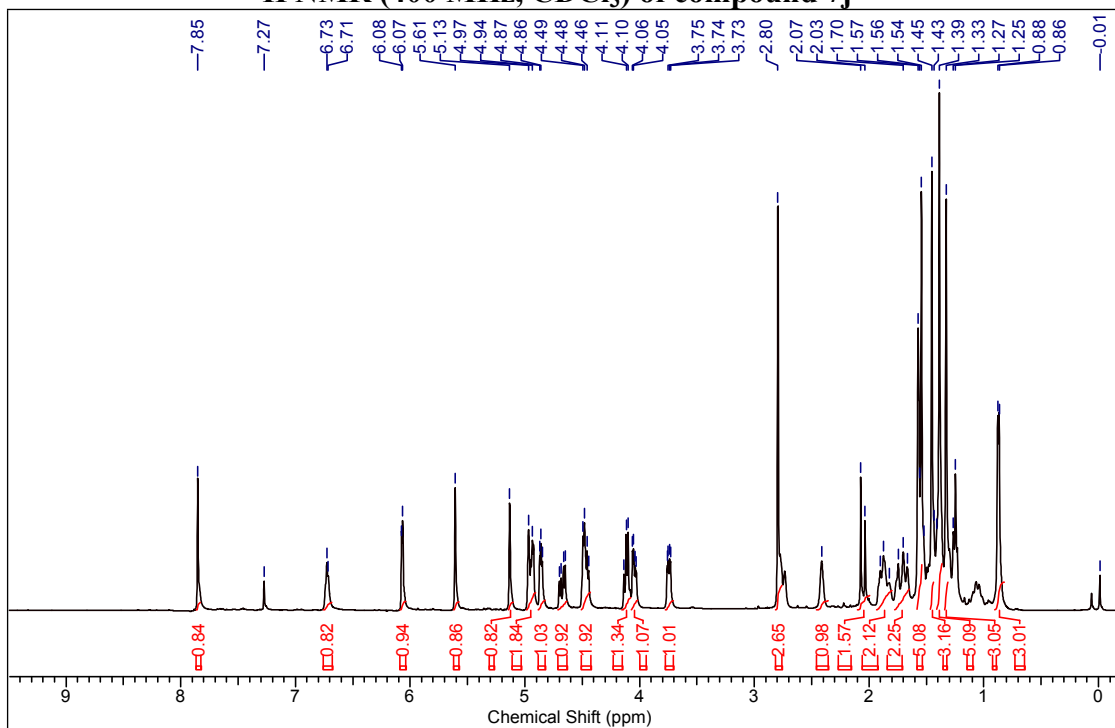

**<sup>13</sup>C NMR (100 MHz, CDCl<sub>3</sub>) of compound 7j**

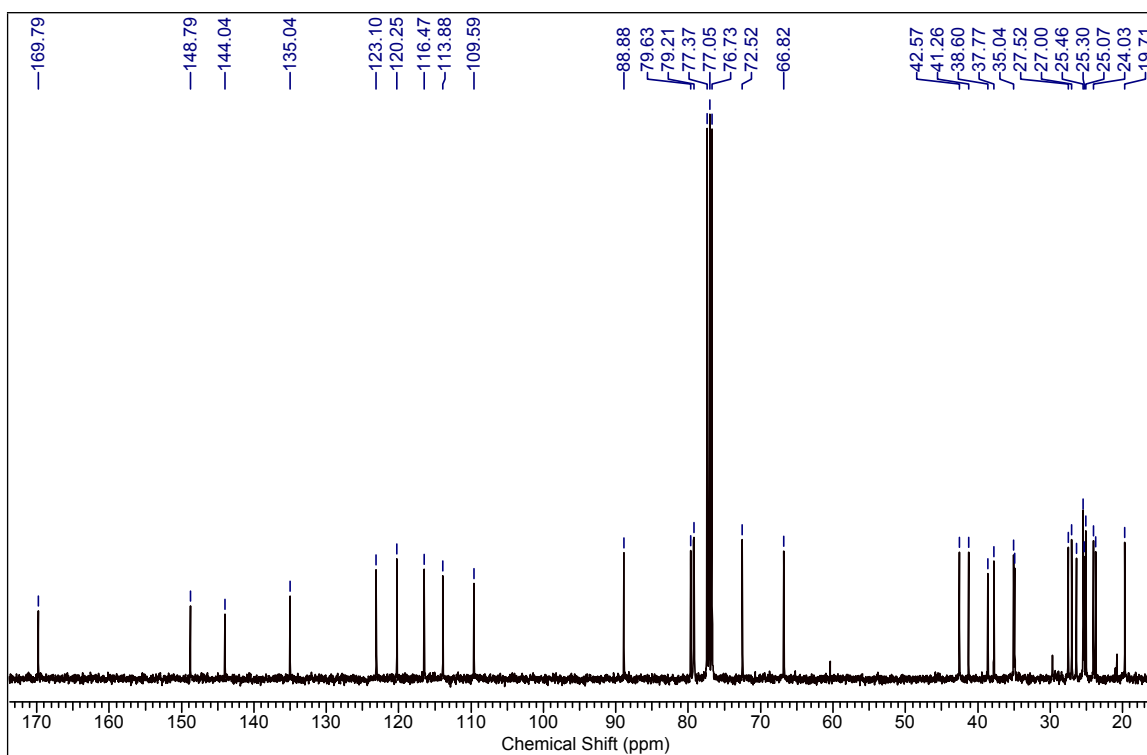

# HRMS of 7j

AA-9 #366 RT: 1.63 AV: 1 NL: 3.89E9  
T: FTMS + p ESI Full ms [100.0000-1500.0000]

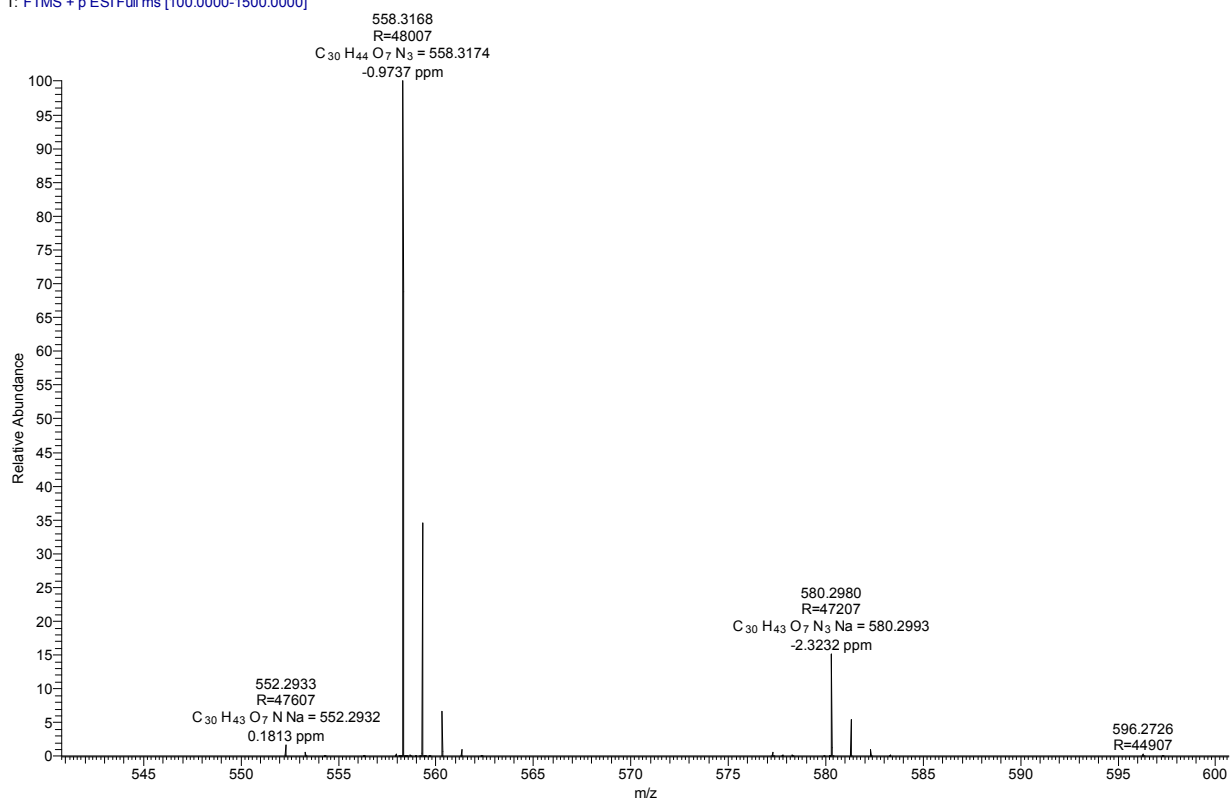

# <sup>1</sup>H NMR (400 MHz, CDCl<sub>3</sub>) of compound 7k

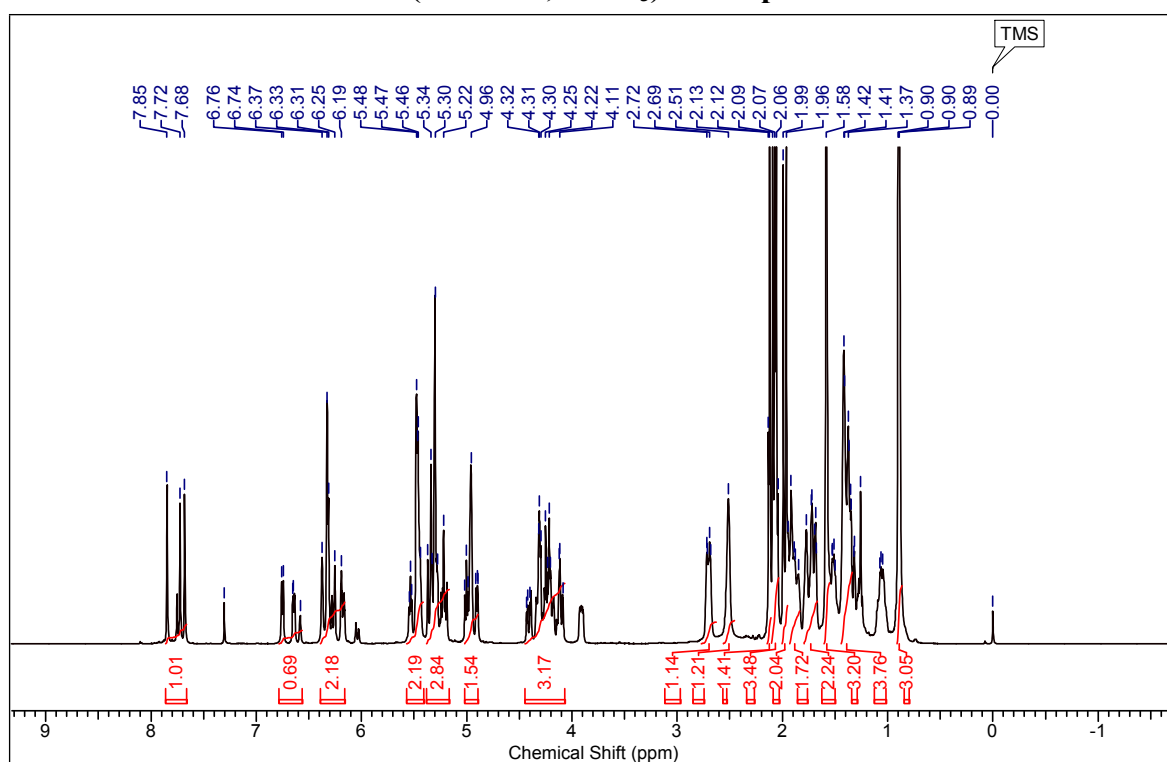

### <sup>13</sup>C NMR (100 MHz, CDCl<sub>3</sub>) of compound 7k

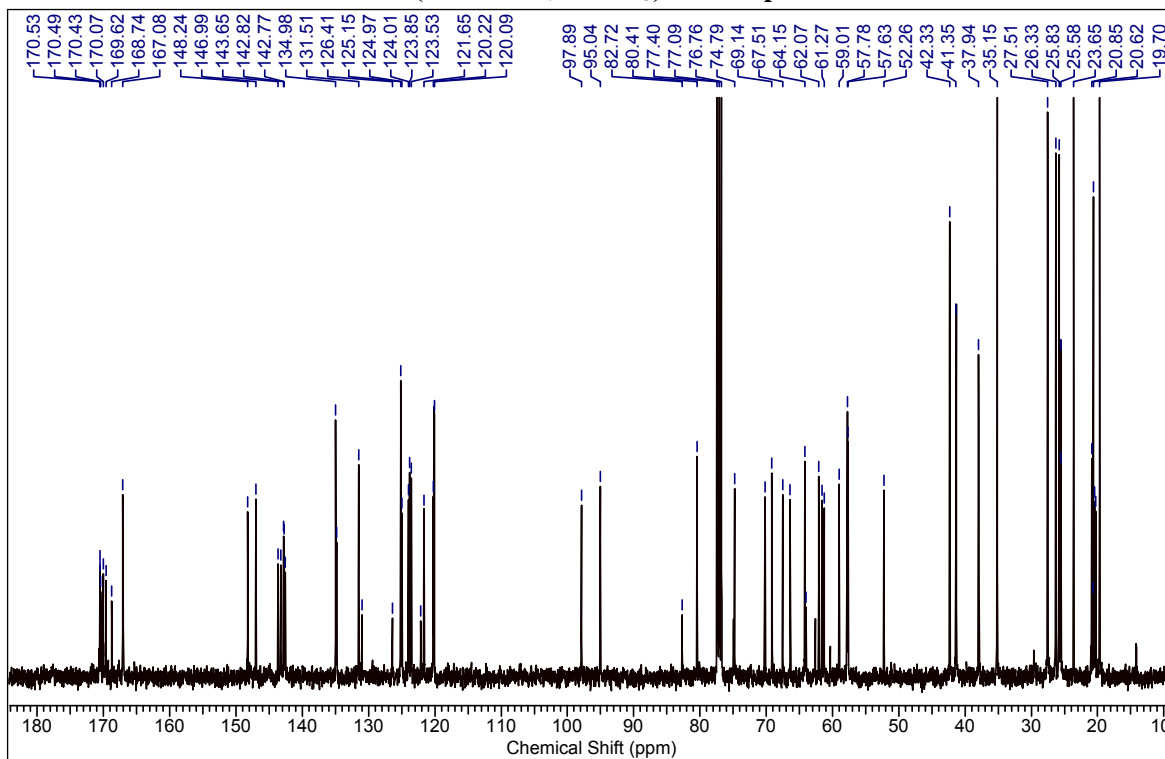

### HRMS of 7k

AA-12 #310 RT: 1.38 AV: 1 NL: 5.41E9  
T: FTMS + p ESI Full ms [100.0000-1500.0000]

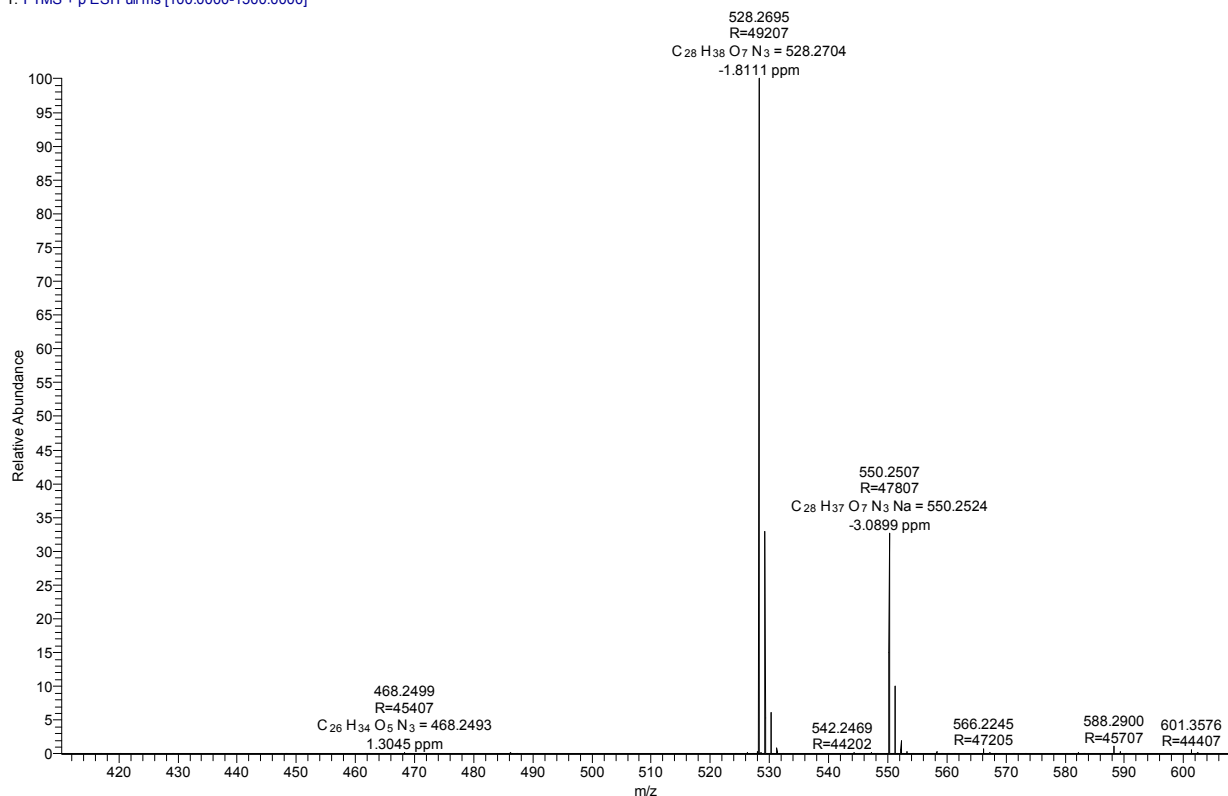

**<sup>1</sup>H NMR (500 MHz, CDCl<sub>3</sub>) of compound 5**

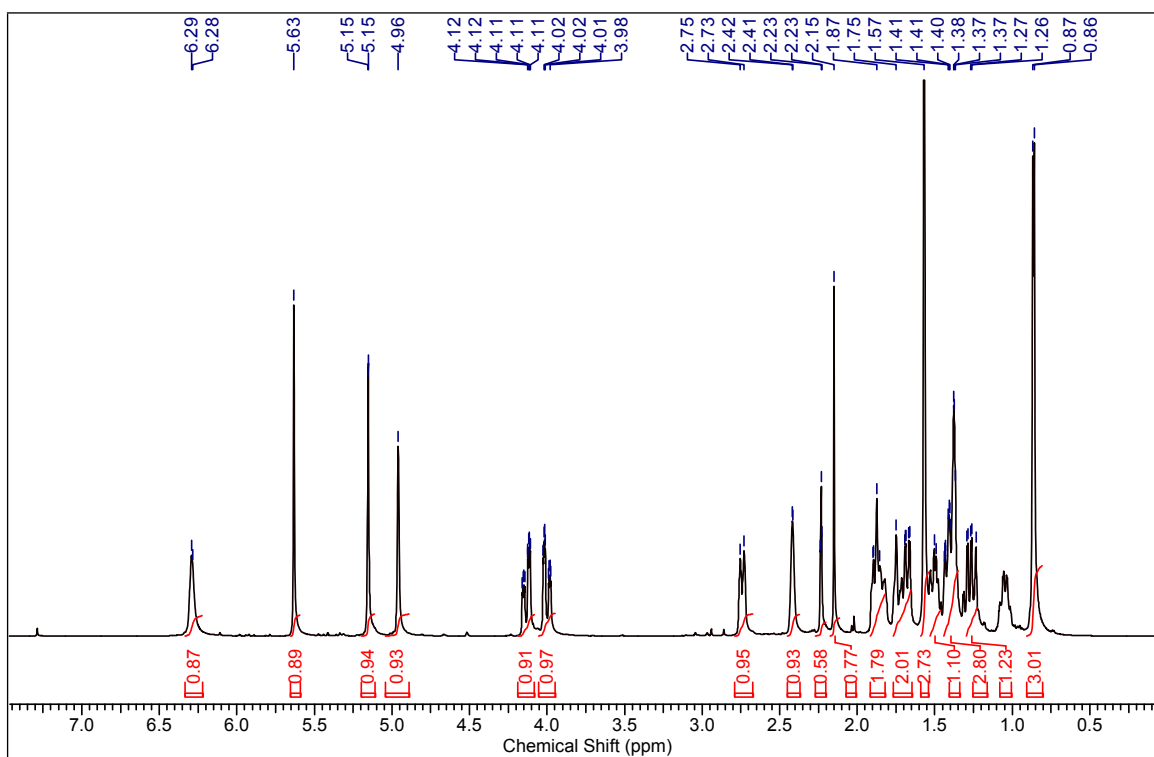

**<sup>13</sup>C NMR (125 MHz, CDCl<sub>3</sub>) of compound 5**

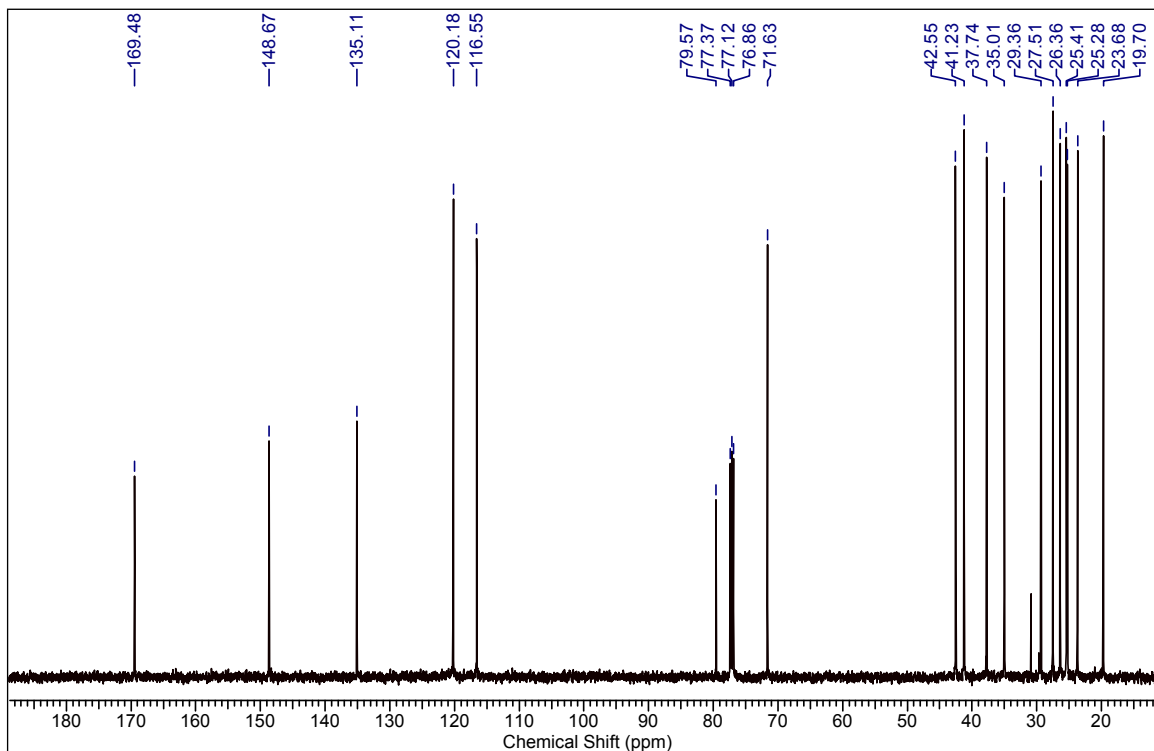

# HRMS of 5

KTK-PA-1 #141 RT: 0.63 AV: 1 NL: 7.31E9  
T: FTMS + p ESI Full ms [100.00-1500.00]

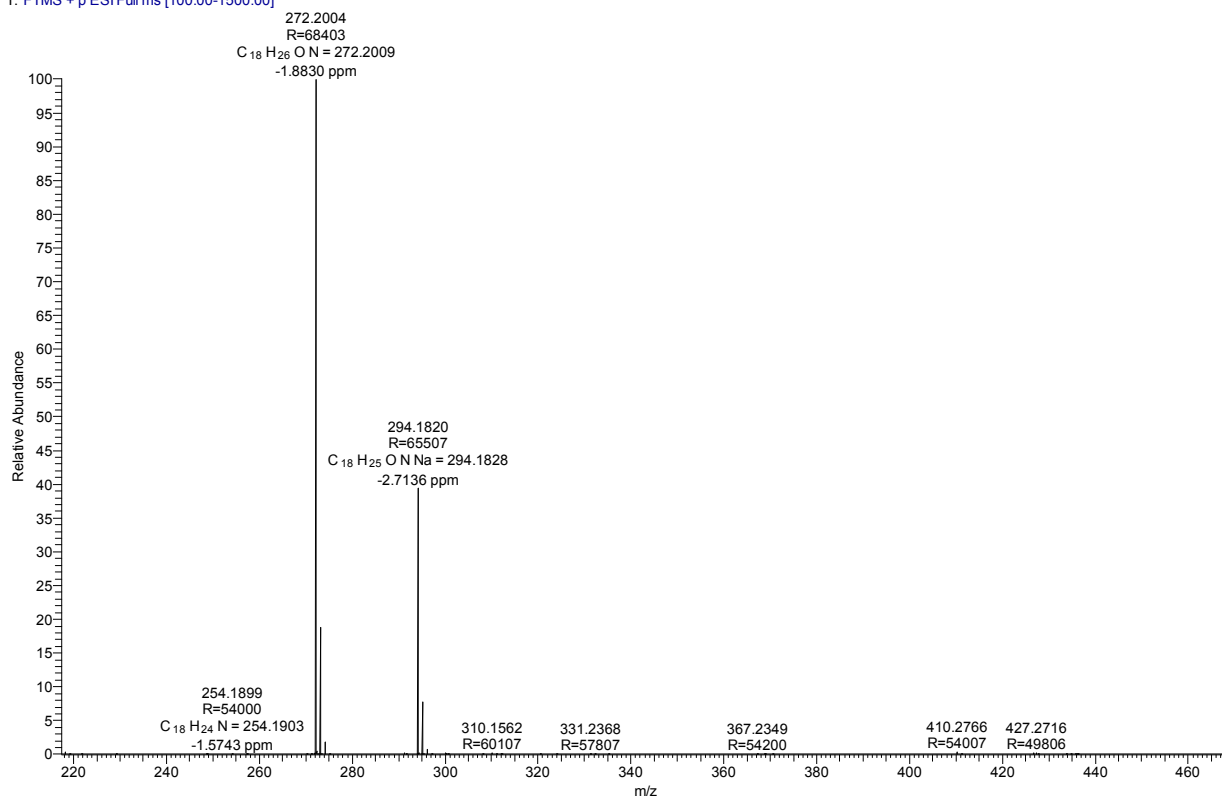

## <sup>1</sup>H NMR (500 MHz, CDCl<sub>3</sub>) of compound 8a

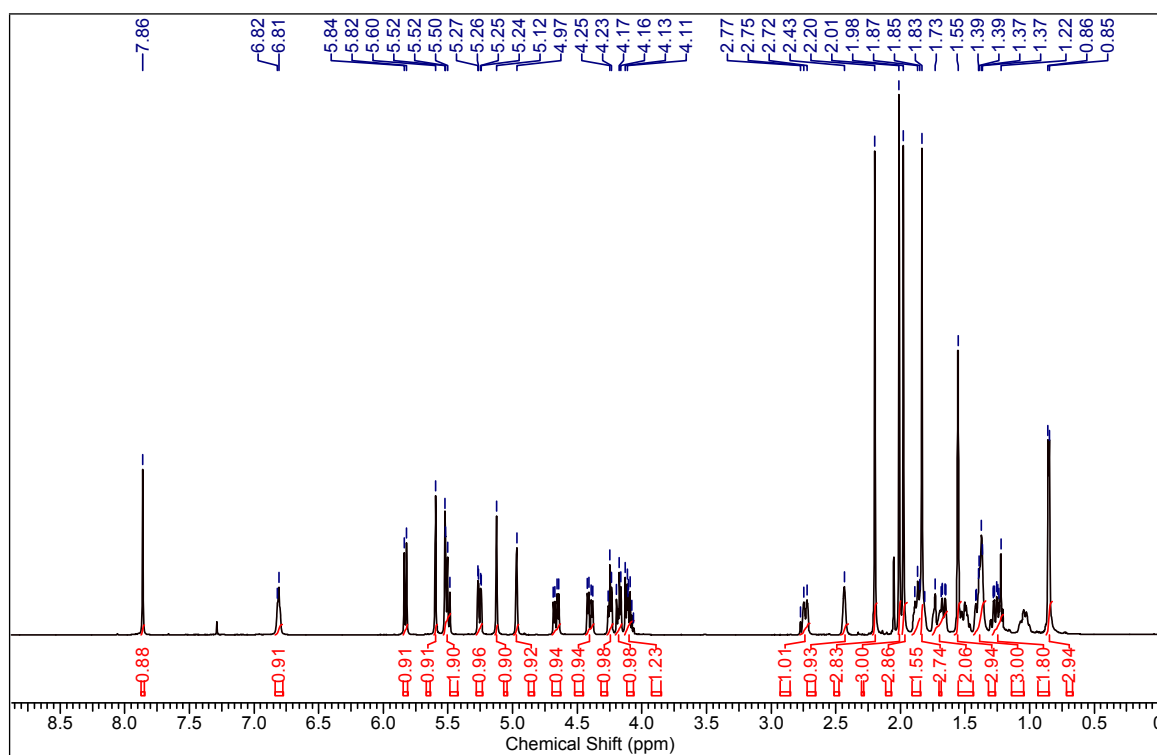

### <sup>13</sup>C NMR (125 MHz, CDCl<sub>3</sub>) of compound 8a

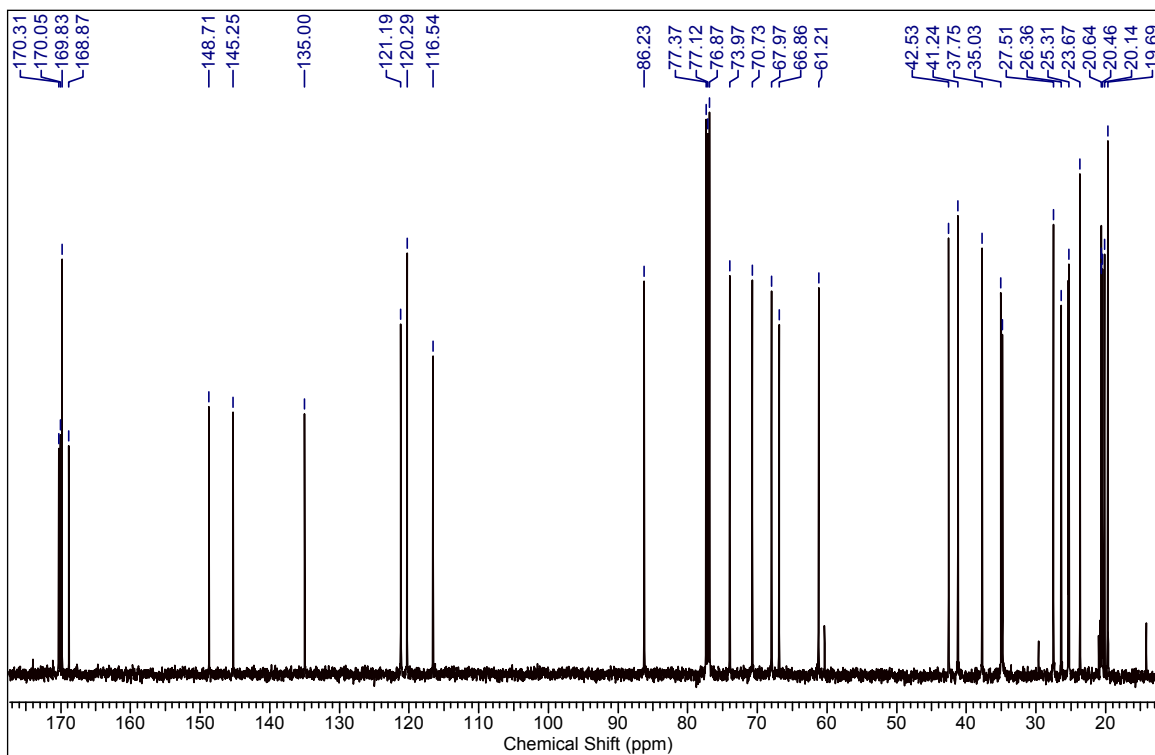

### HRMS of 8a

KTK-PA-2 #140-142 RT: 0.62-0.63 AV: 3 NL: 2.43E9  
T: FTMS + p ESIFull ms [100.00-1500.00]

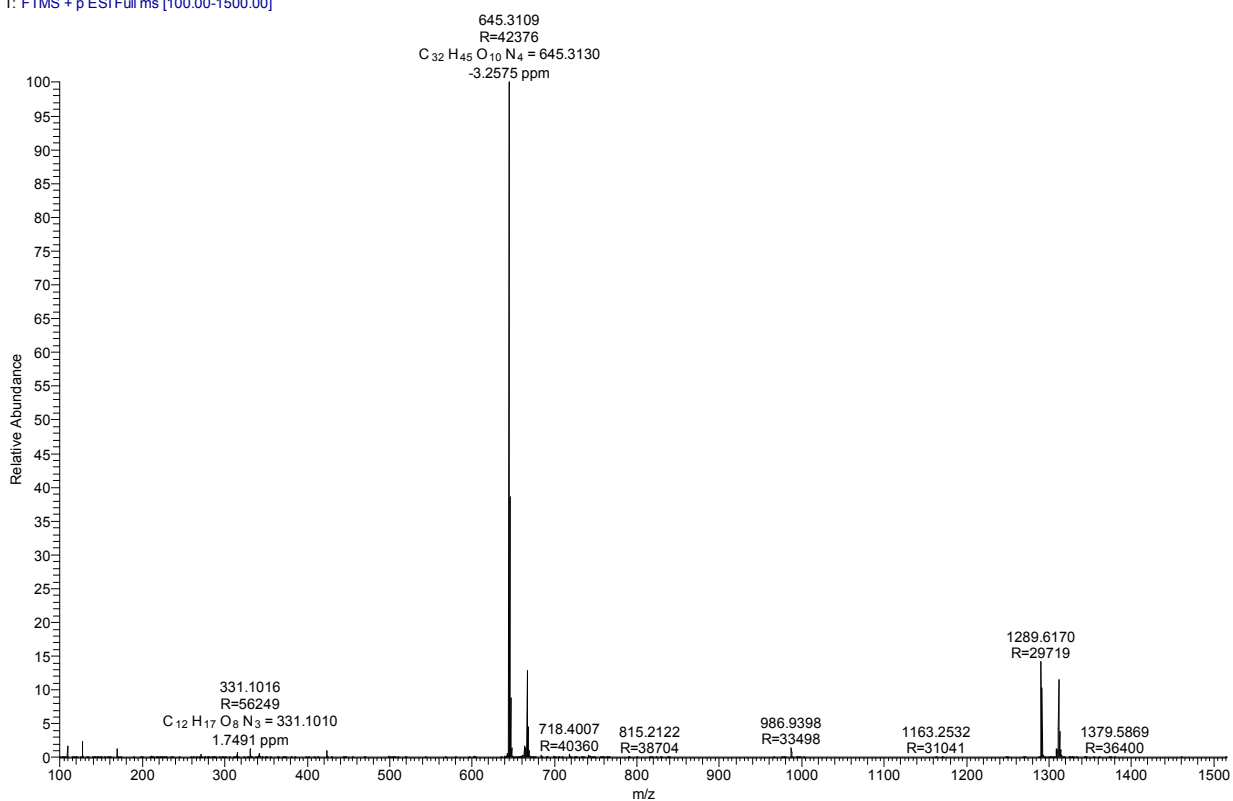

### <sup>1</sup>H NMR (500 MHz, CDCl<sub>3</sub>) of compound 8b

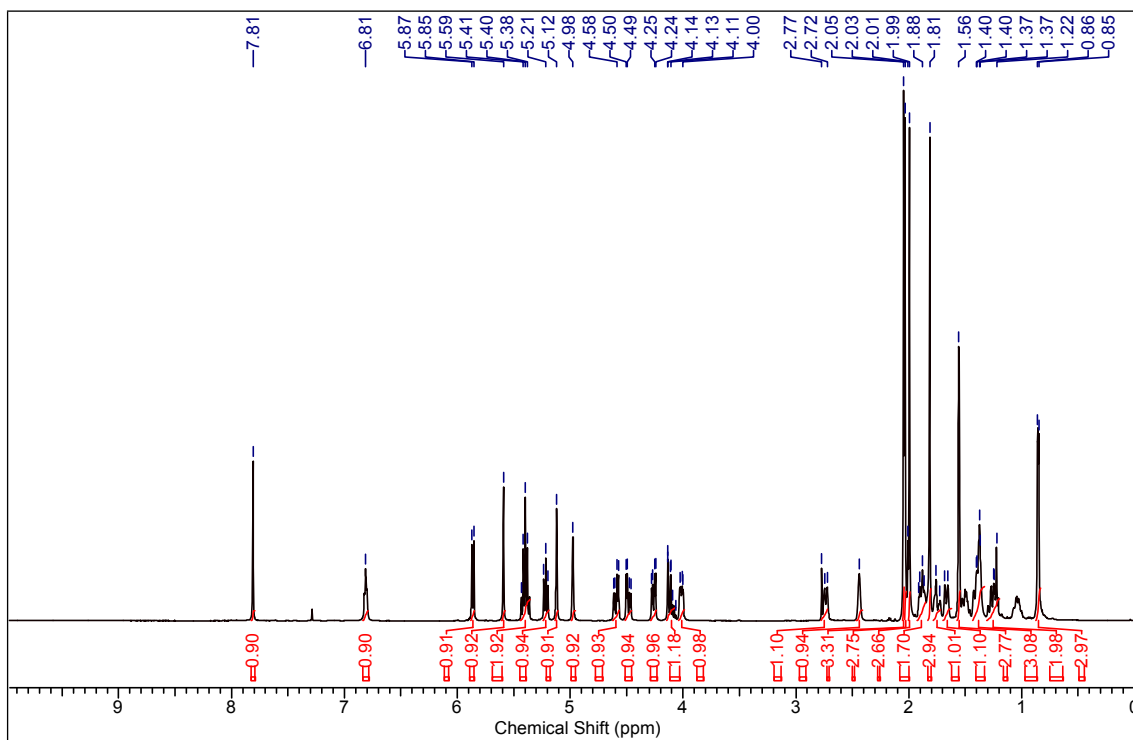

### <sup>13</sup>C NMR (125 MHz, CDCl<sub>3</sub>) of compound 8b

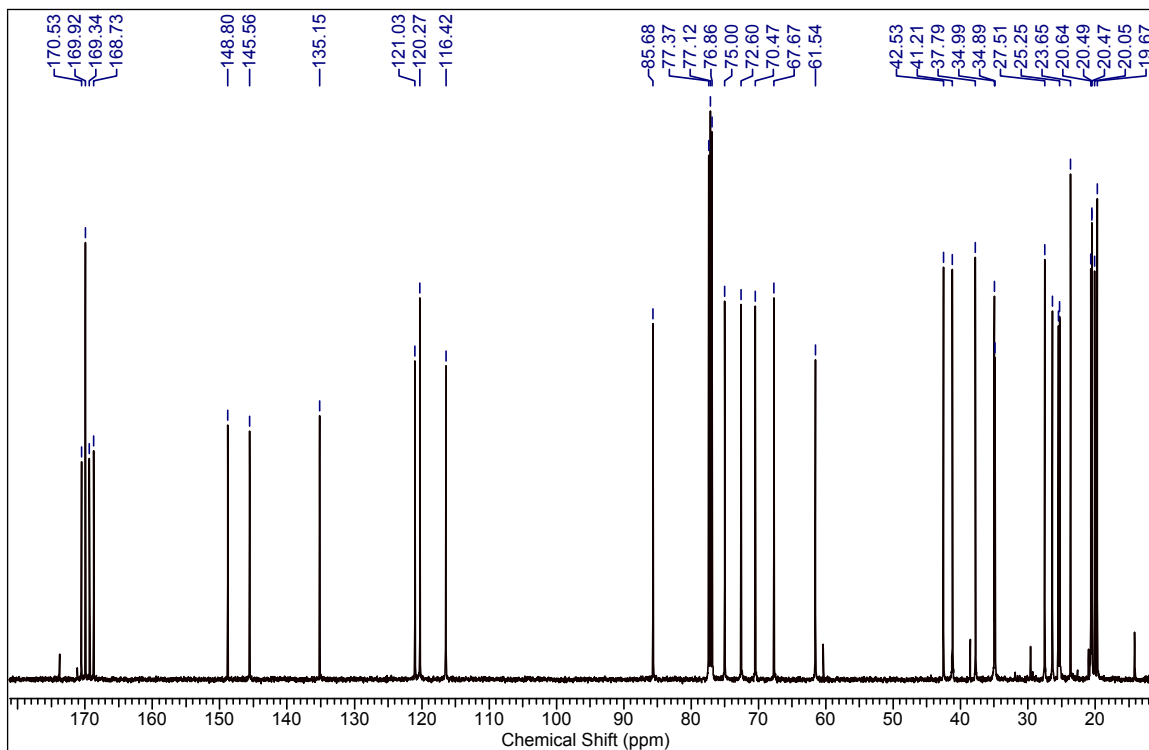

## HRMS of 8b

KTK-PA-3 #130 RT: 0.58 AV: 1 NL: 2.07E9  
T: FTMS + p ESI Full ms [100.00-1500.00]

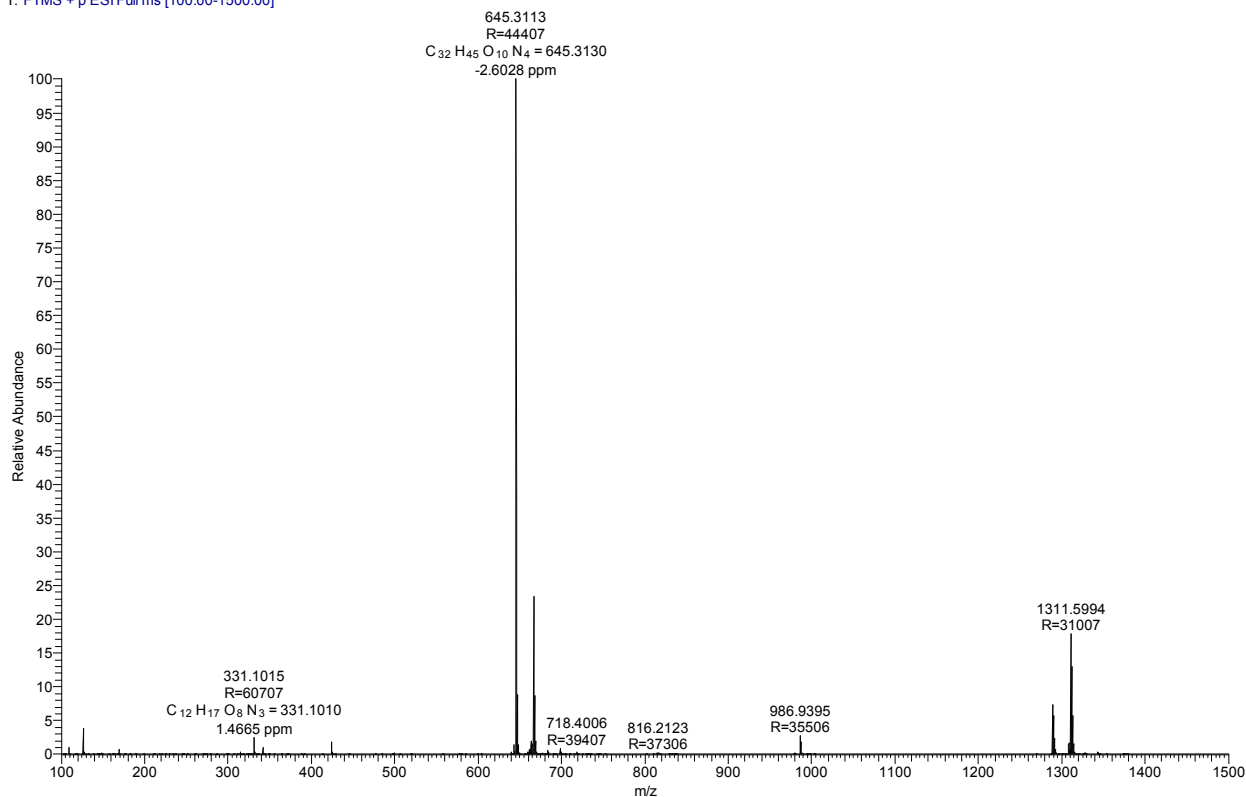

## $^1H$ NMR (400 MHz, $CDCl_3$ ) of compound 8c

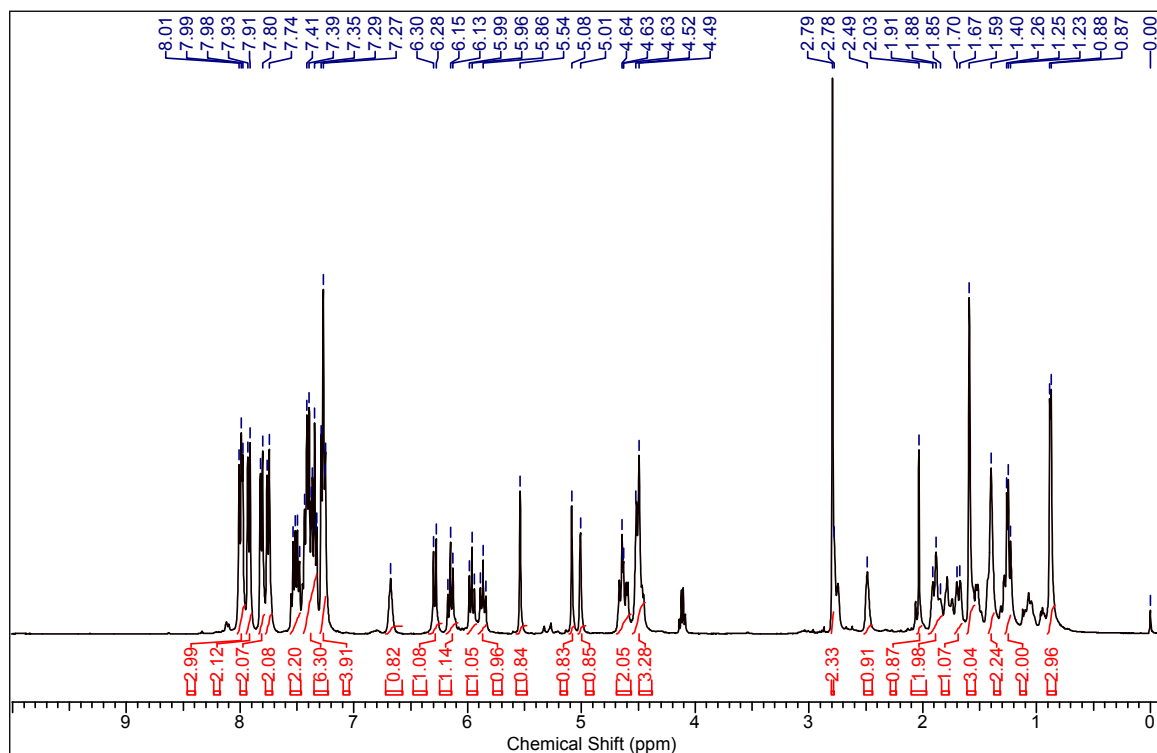



### <sup>13</sup>C NMR (100 MHz, CDCl<sub>3</sub>) of compound 8c

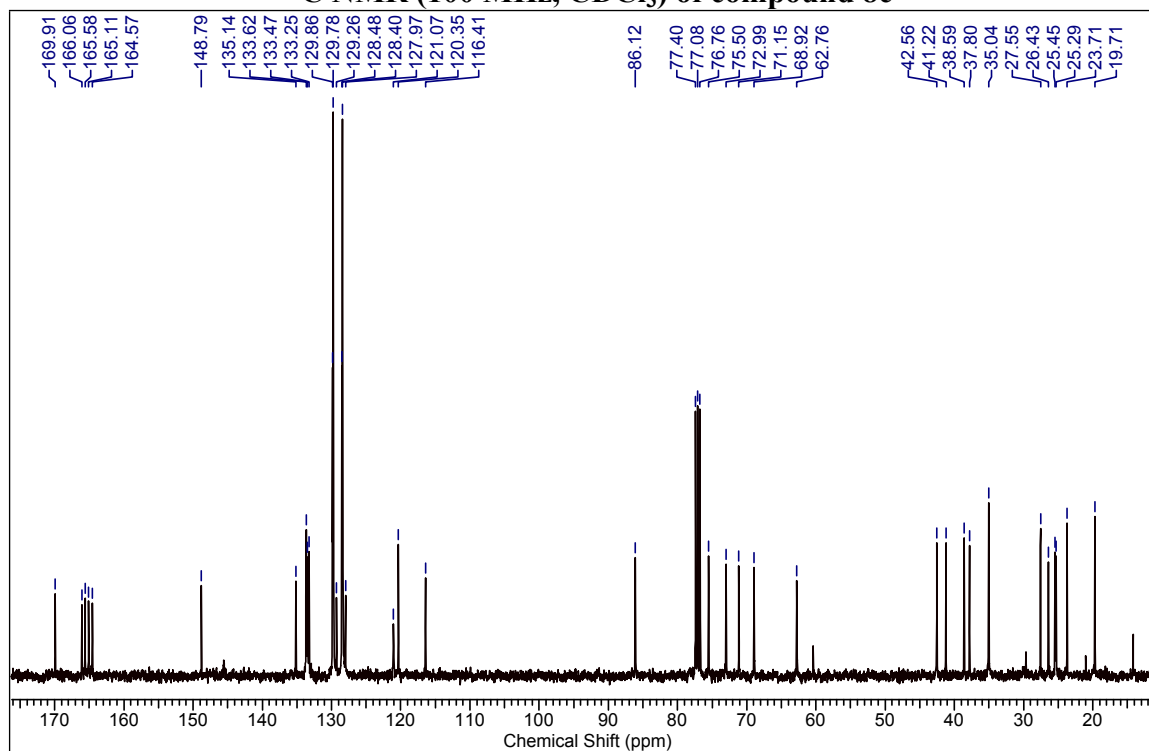

### HRMS of 8c

KTK-PA-4 #214 RT: 0.95 AV: 1 NL: 2.22E8  
T: FTMS + p ESI Full ms [100.00-1500.00]

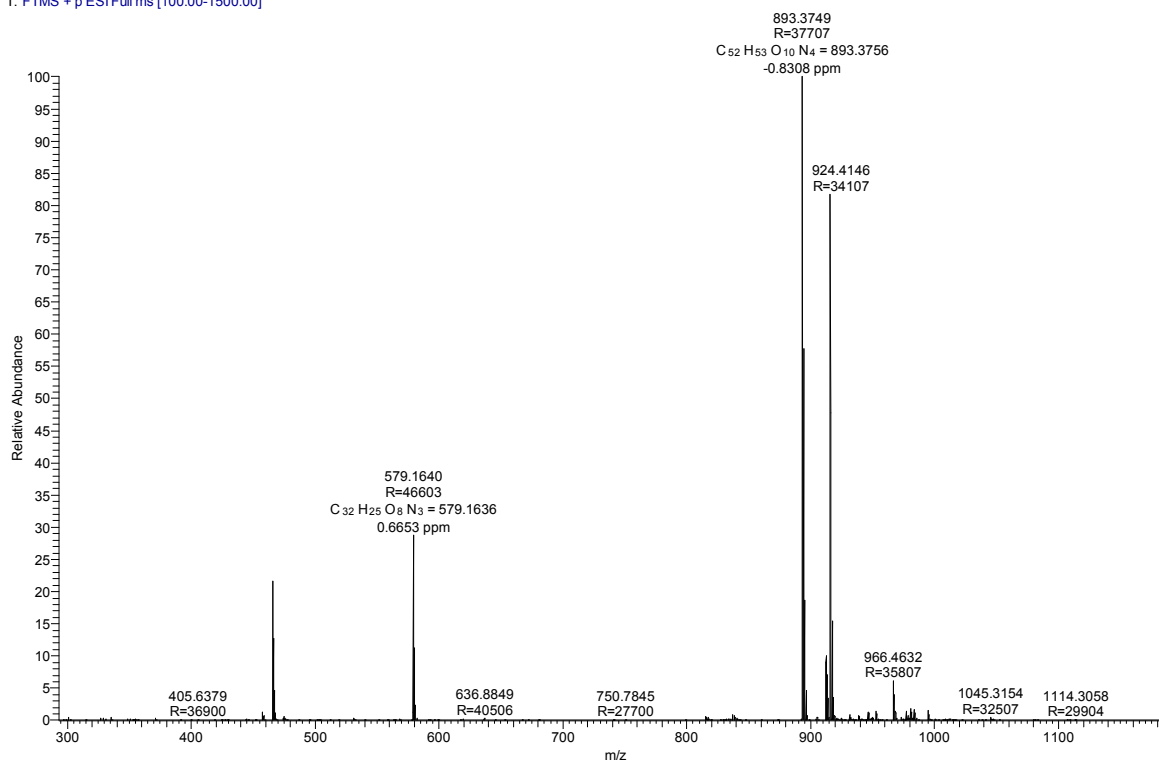

### <sup>1</sup>H NMR (400 MHz, CDCl<sub>3</sub>) of compound 8d

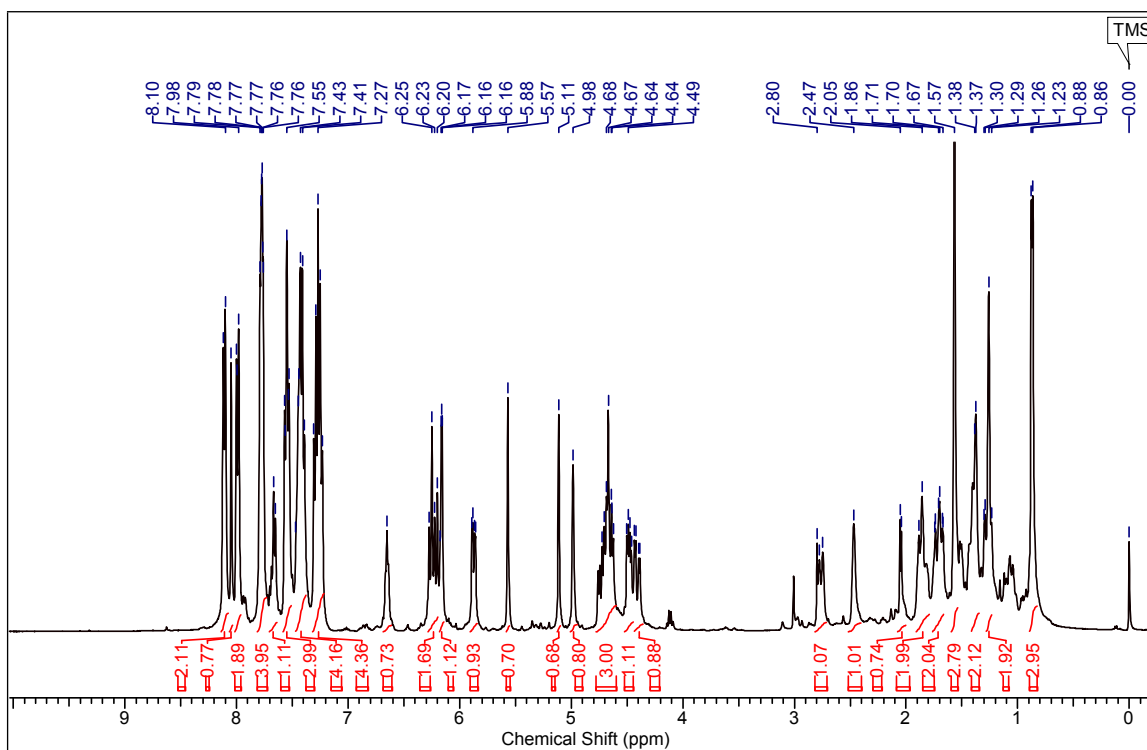

### <sup>13</sup>C NMR (100 MHz, CDCl<sub>3</sub>) of compound 8d

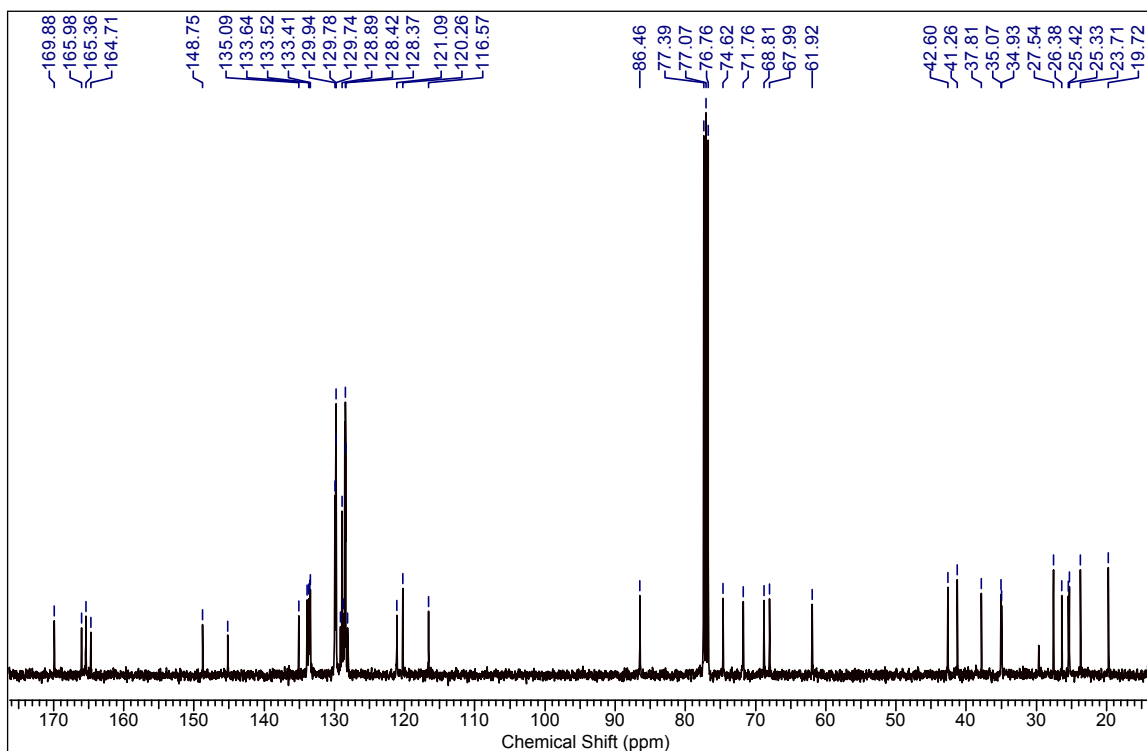

# HRMS of 8d

KTK-PA-6 #232 RT: 1.03 AV: 1 NL: 3.76E8  
T: FTMS + p ESI Full ms [100.00-1500.00]

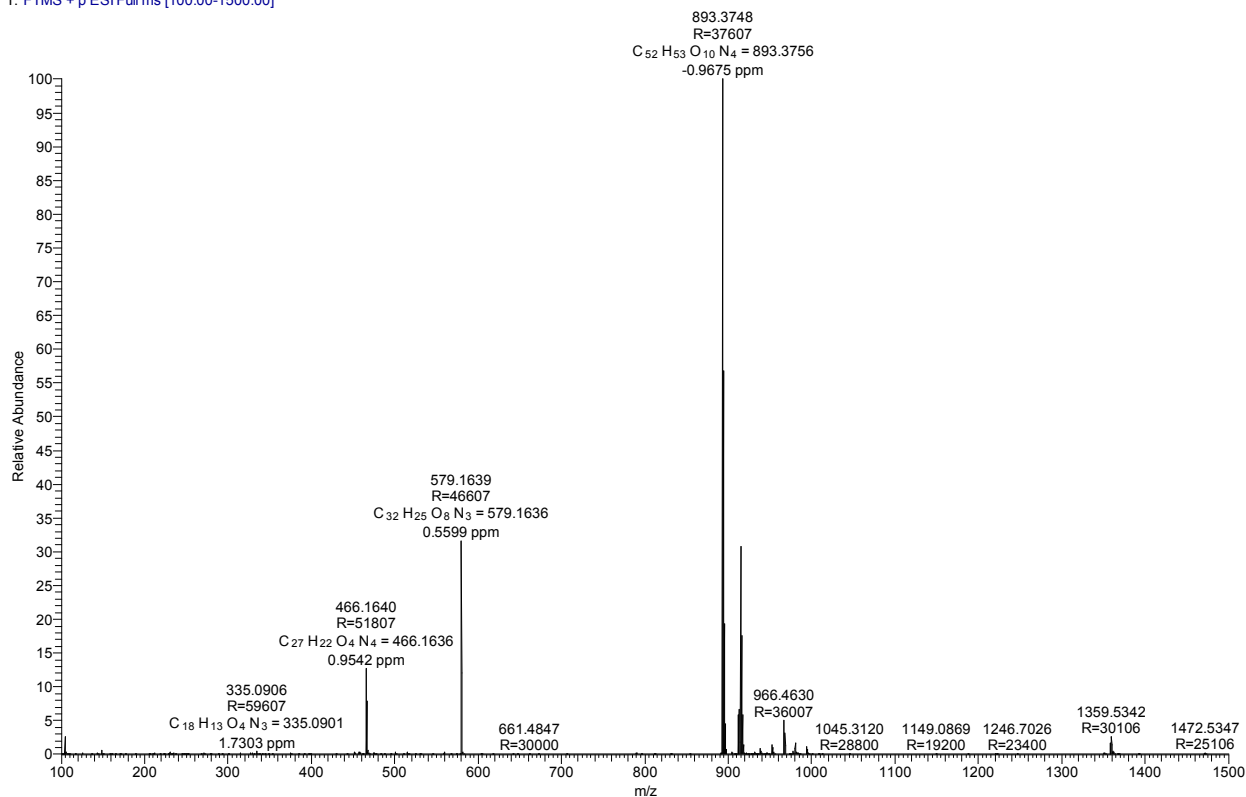

# <sup>1</sup>H NMR (400 MHz, CDCl<sub>3</sub>) of compound 8e

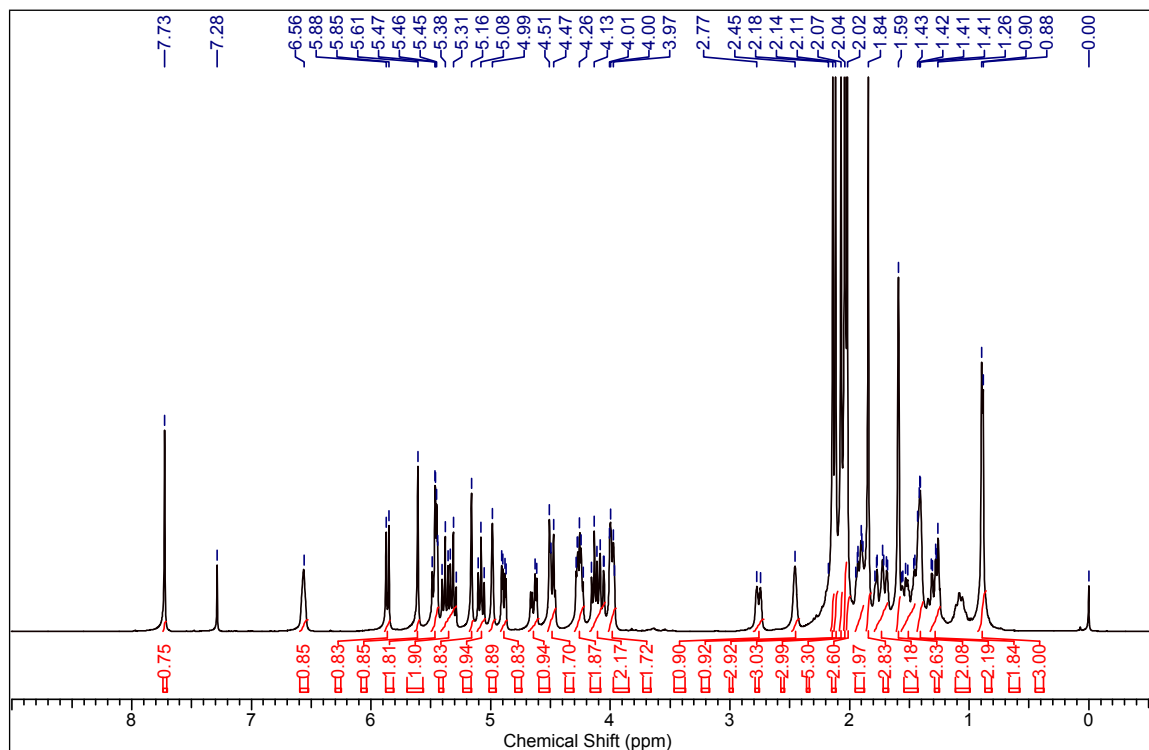

### <sup>13</sup>C NMR (100 MHz, CDCl<sub>3</sub>) of compound 8e

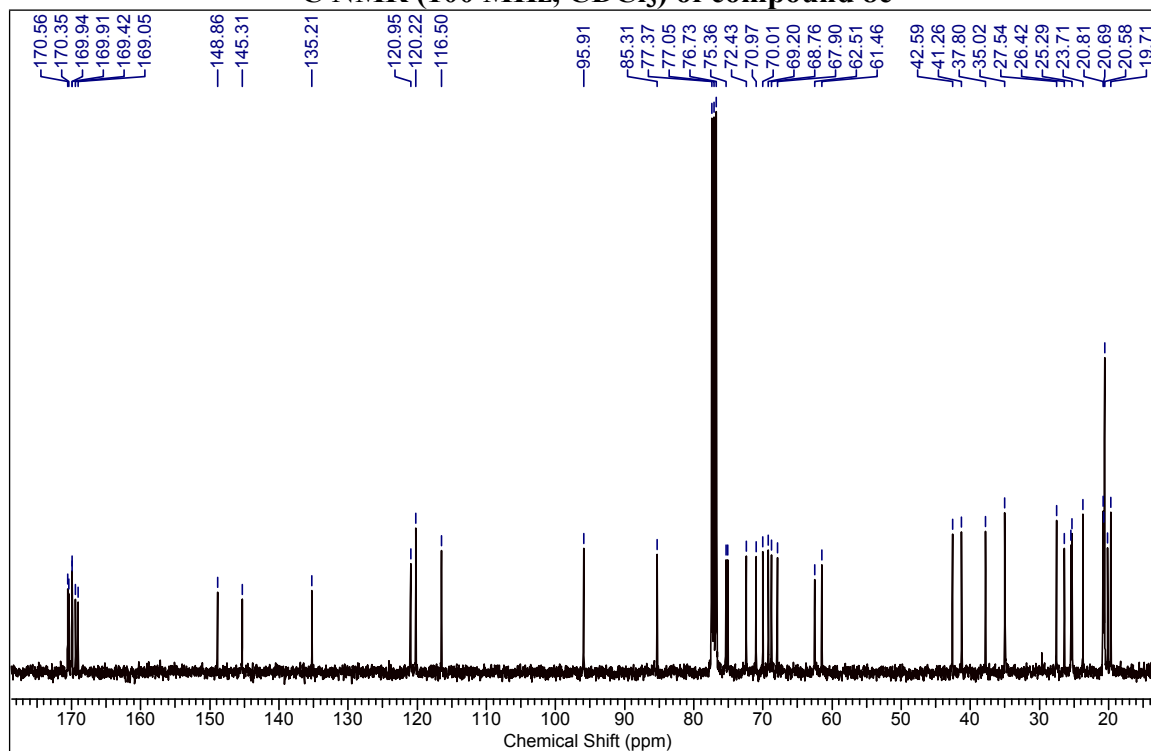

### HRMS of 8e

PA-9 #296 RT: 1.32 AV: 1 NL: 9.92E8  
T: FTMS + p ESI Full ms [100.0000-1500.0000]

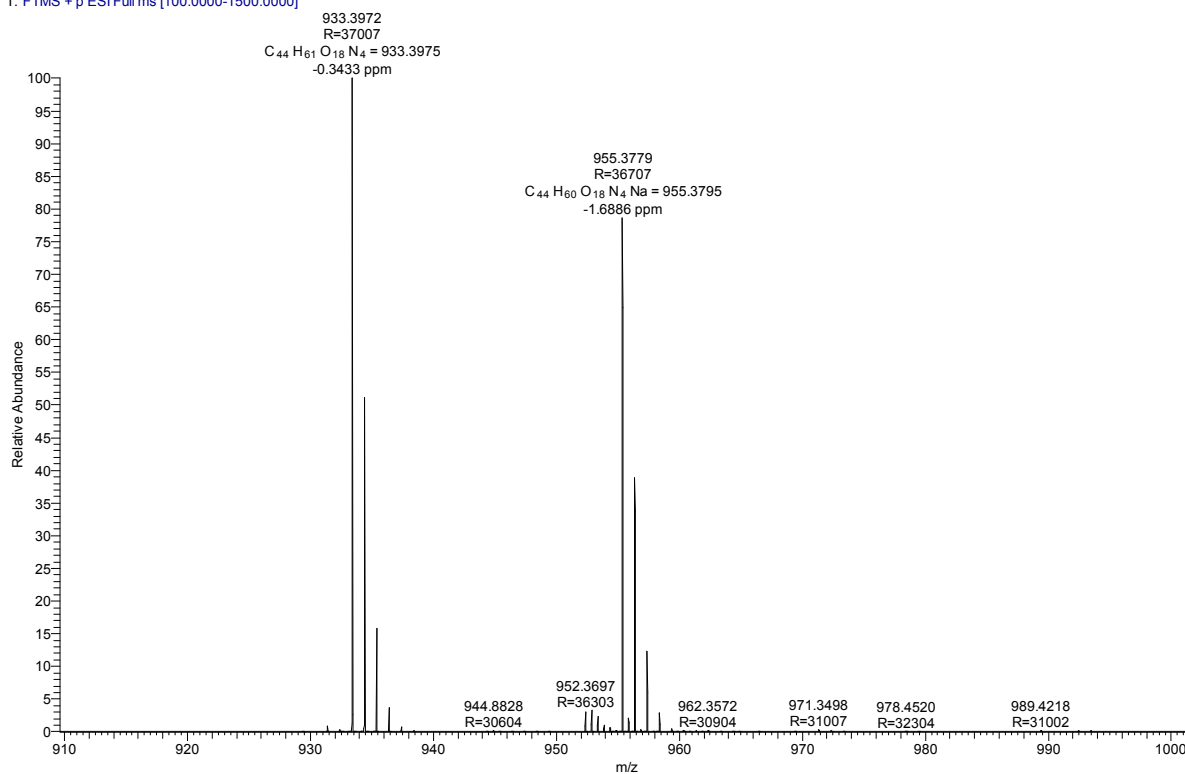

**<sup>1</sup>H NMR (400 MHz, CDCl<sub>3</sub>) of compound 8f**

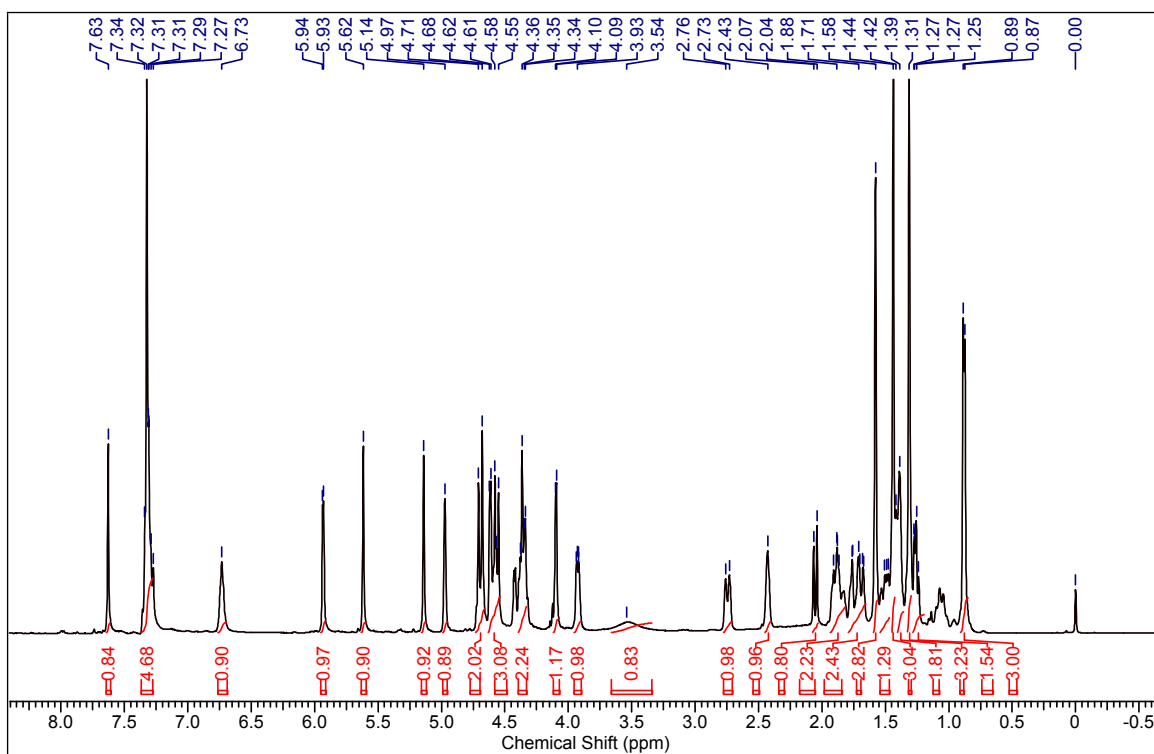

**<sup>13</sup>C NMR (100 MHz, CDCl<sub>3</sub>) of compound 8f**

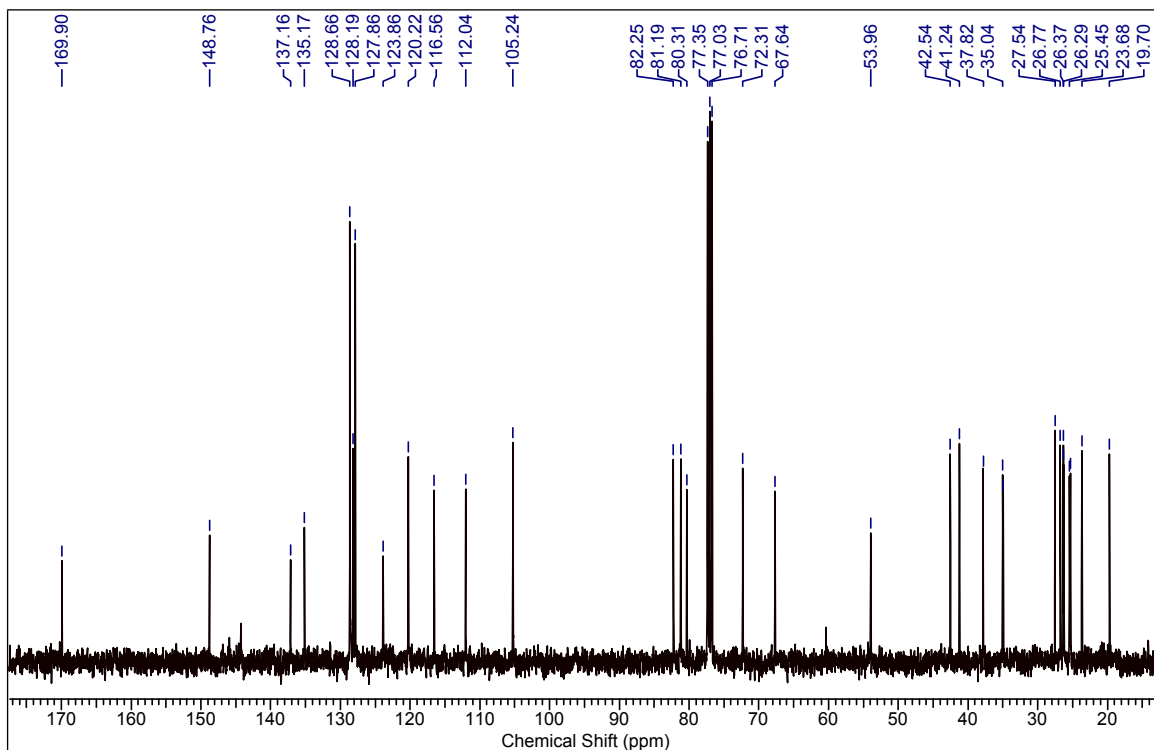

# HRMS of 8f

PA-12 #315 RT: 1.40 AV: 1 NL: 1.27E9  
T: FTMS + p ESI Full ms [100.0000-1500.0000]

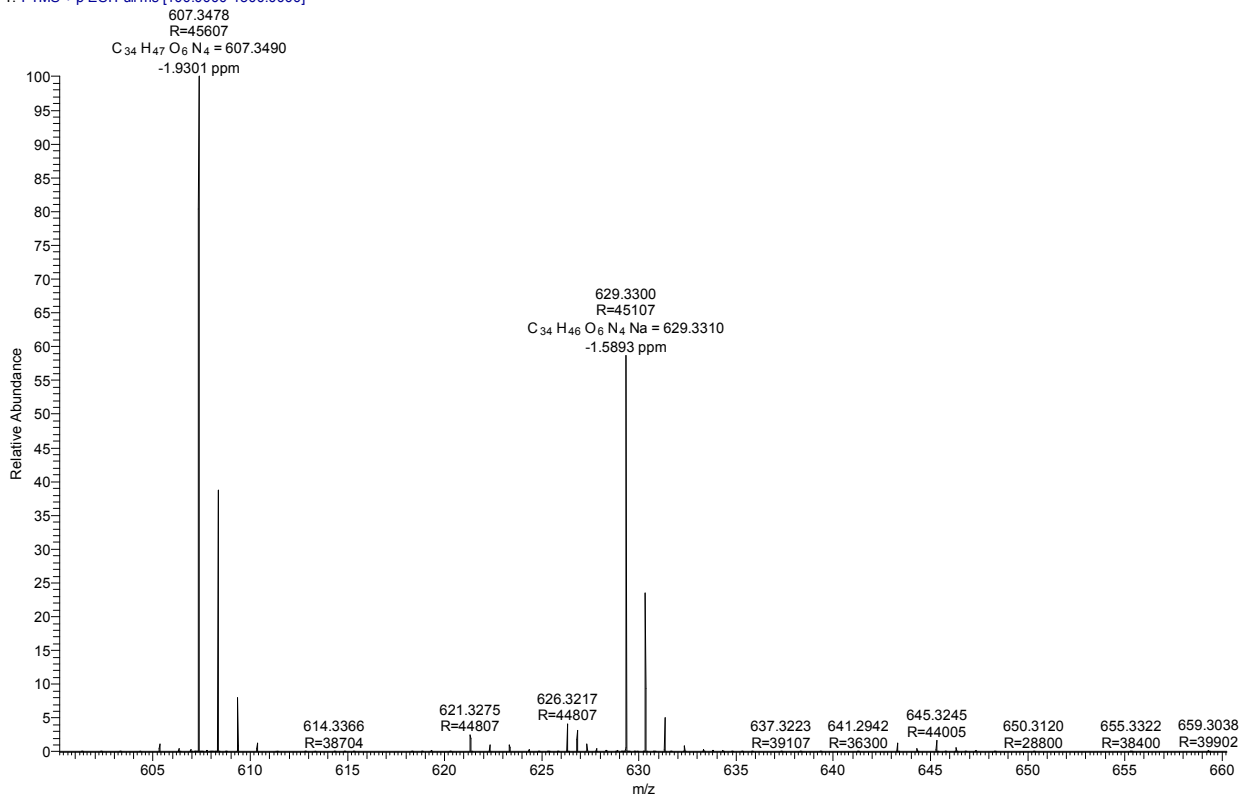

# <sup>1</sup>H NMR (400 MHz, CDCl<sub>3</sub>) of compound 8g

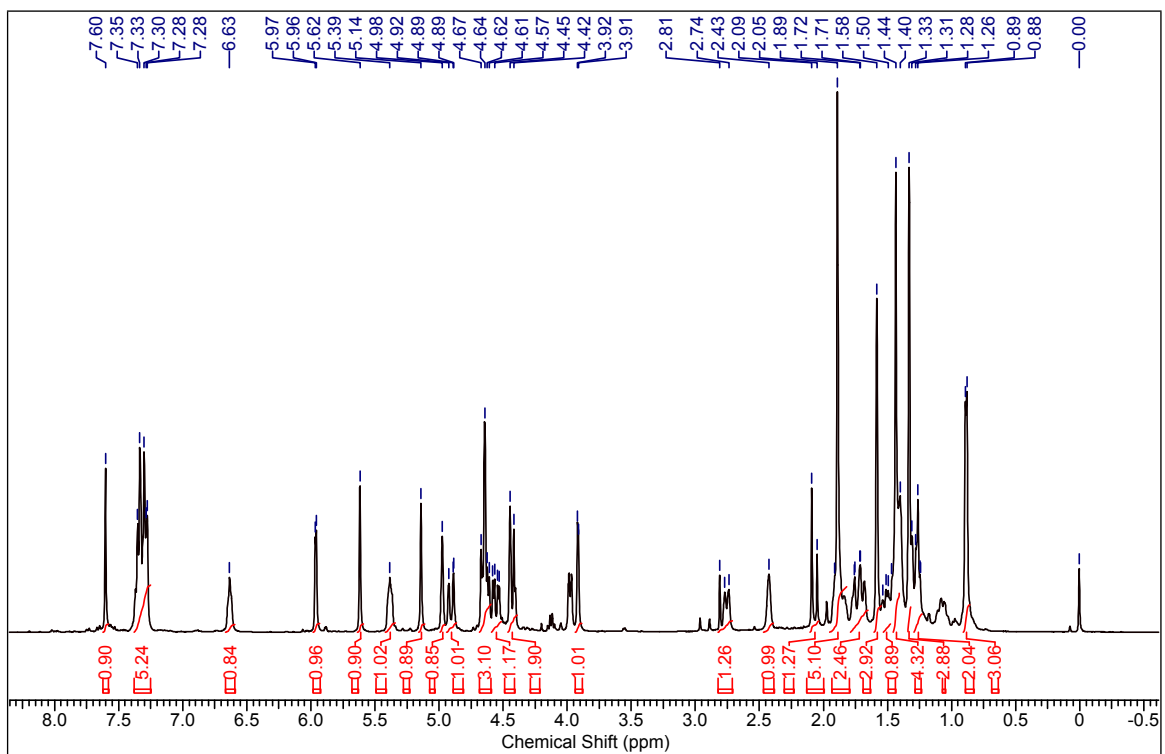

### <sup>13</sup>C NMR (100 MHz, CDCl<sub>3</sub>) of compound 8g

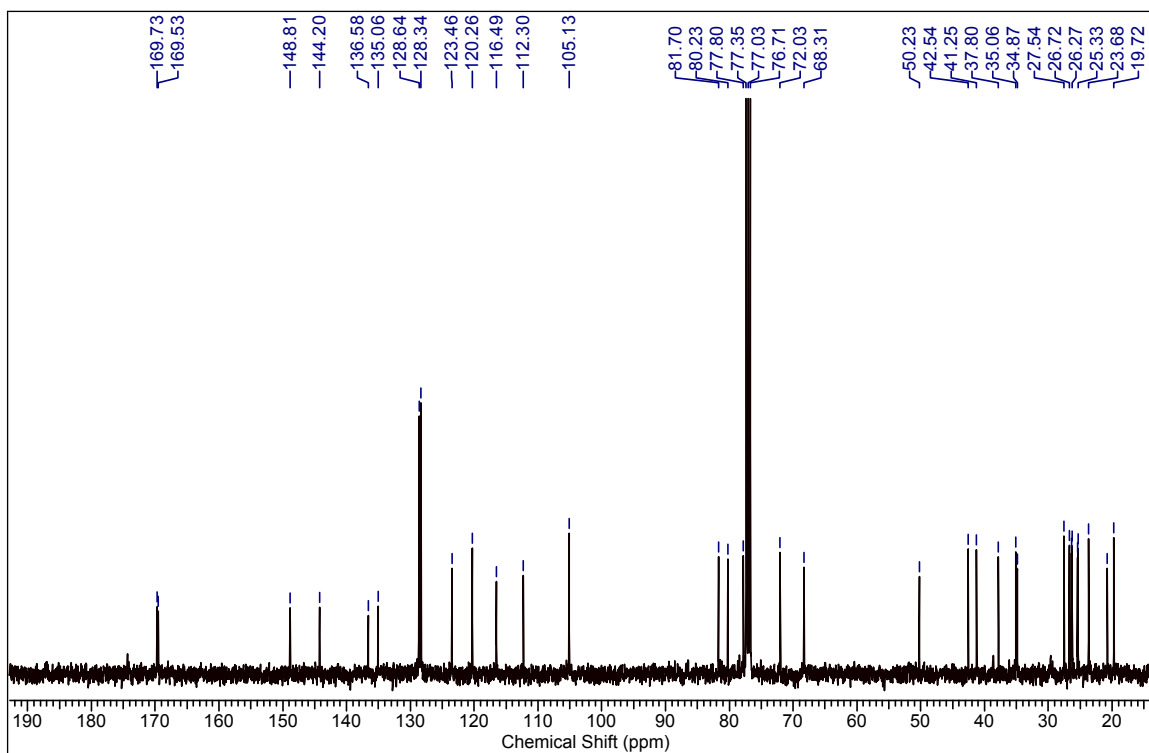

### HRMS of 8g

KTK-PA-10 #180 RT: 0.80 AV: 1 NL: 3.78E9  
T: FTMS + p ESI Full ms [100.00-1500.00]

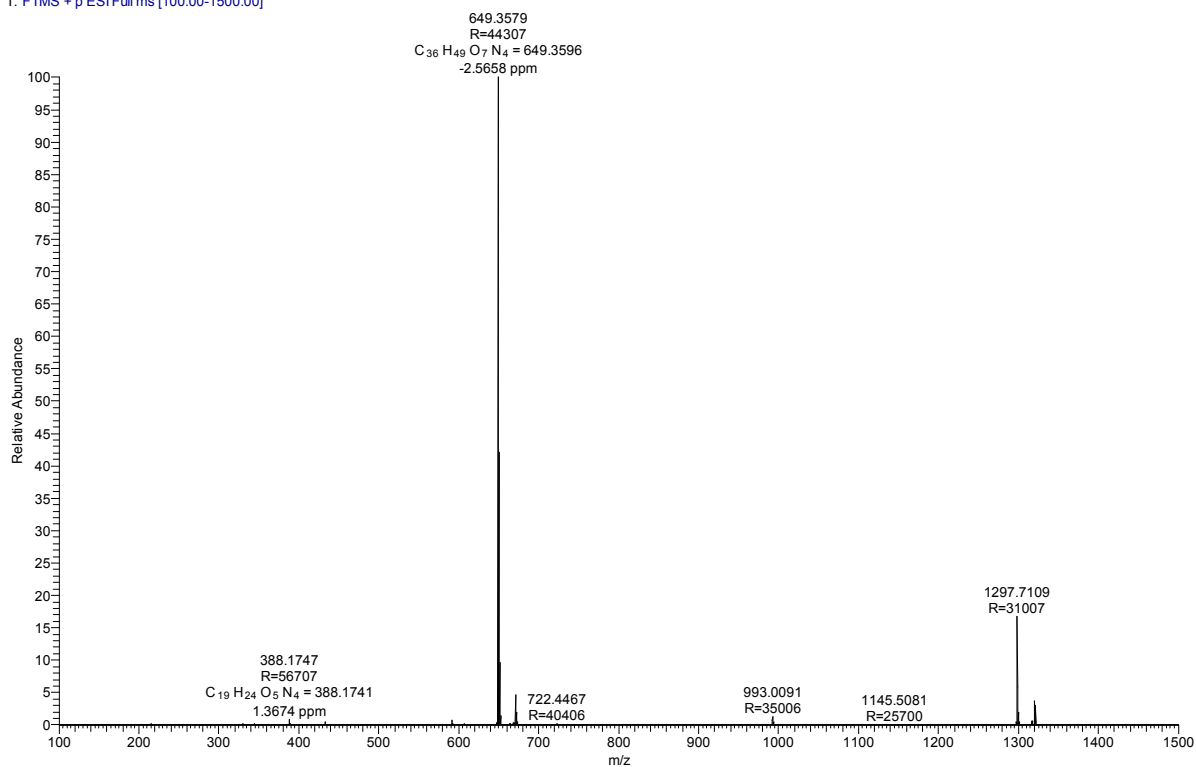

**<sup>1</sup>H NMR (400 MHz, CDCl<sub>3</sub>) of compound 8h**

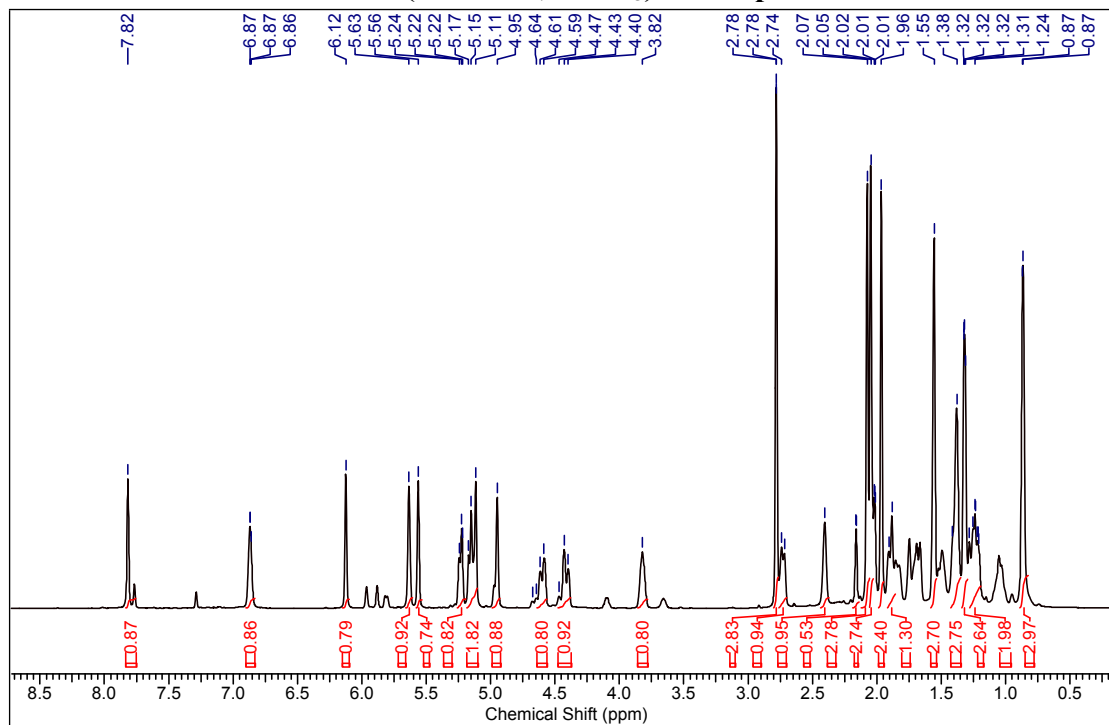

**<sup>13</sup>C NMR (100 MHz, CDCl<sub>3</sub>) of compound 8h**

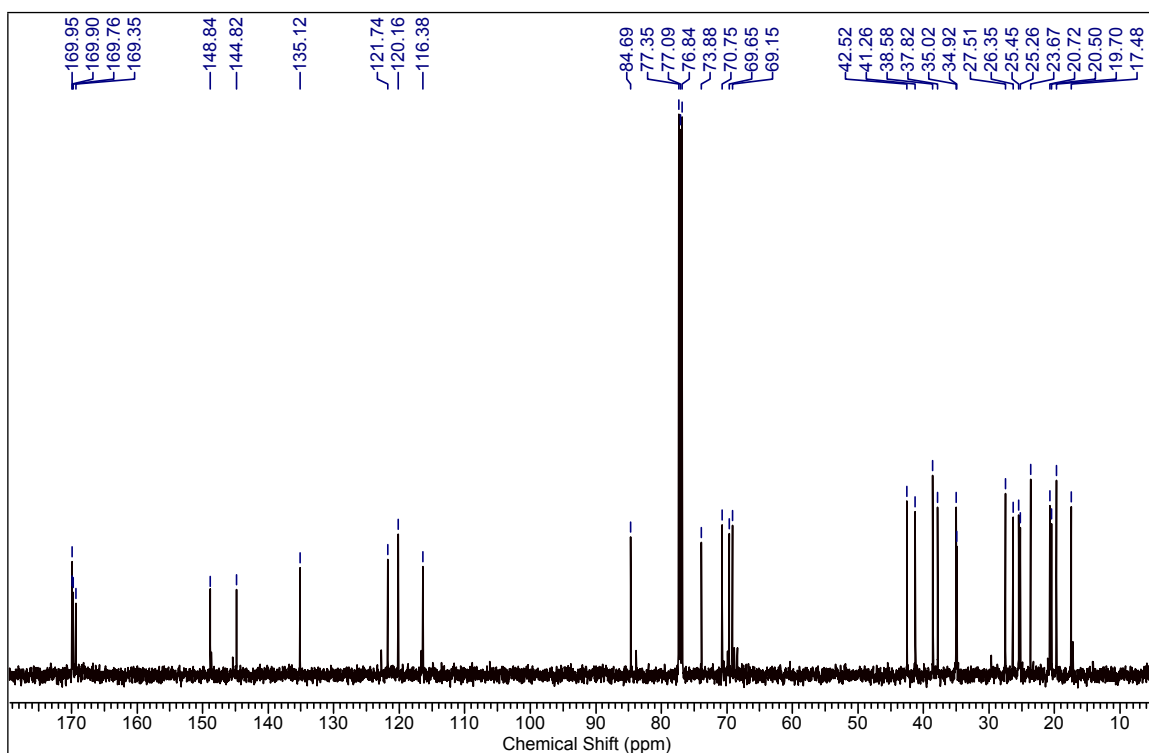



# HRMS of 8h

KTK-PA-5 #140 RT: 0.62 AV: 1 NL: 1.40E9  
T: FTMS + p ESI Full ms [100.00-1500.00]

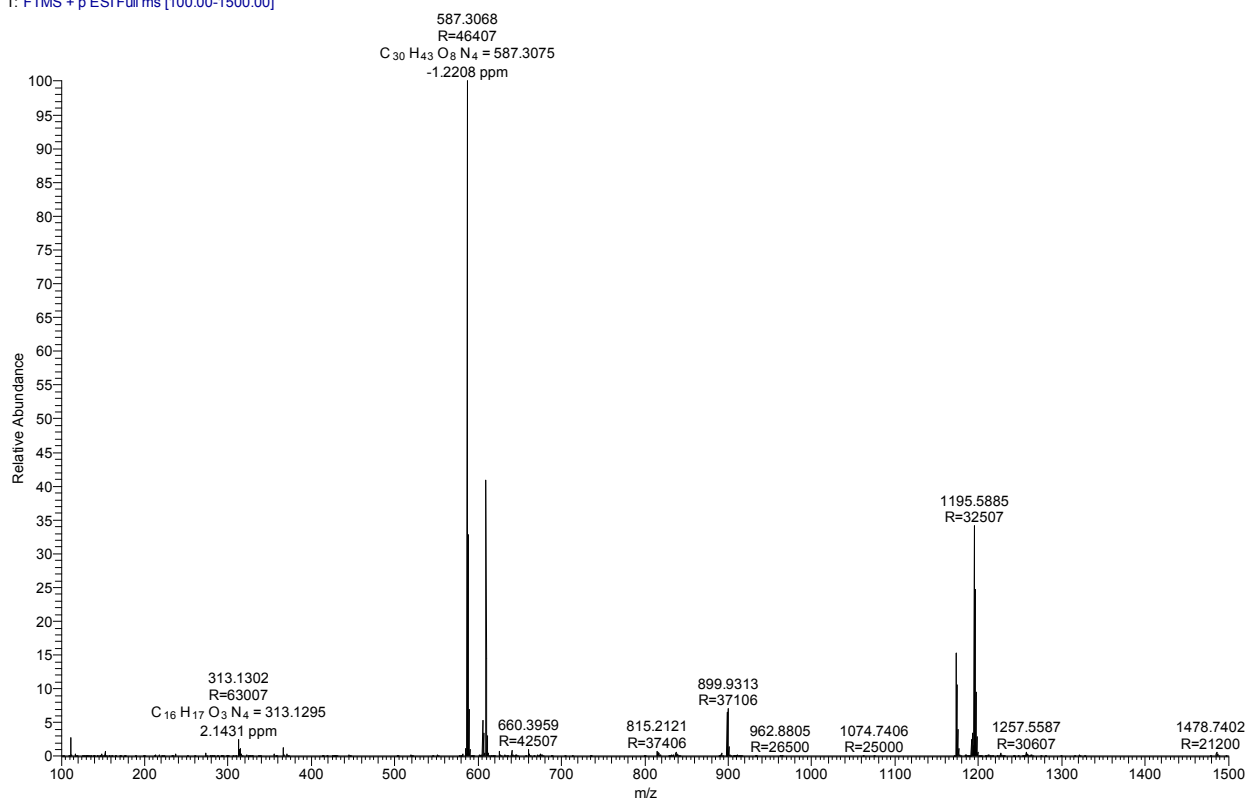

# $^1H$ NMR (500 MHz, $CDCl_3$ ) of compound 8i

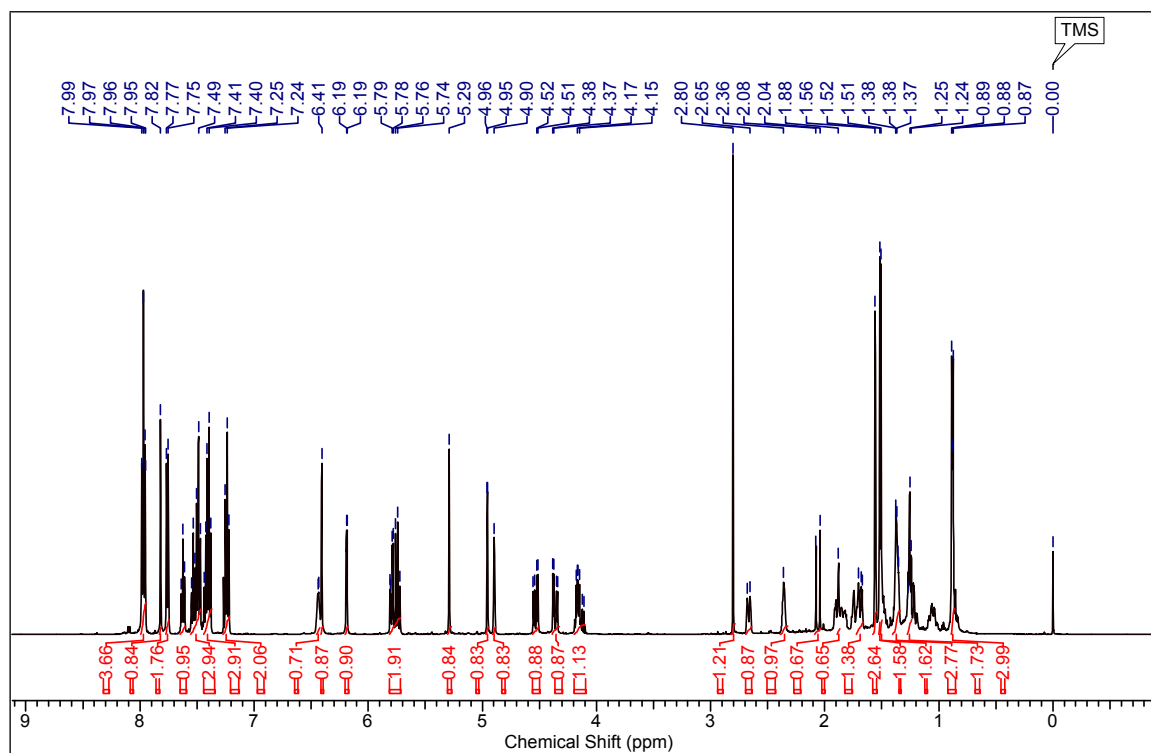

### <sup>13</sup>C NMR (125 MHz, CDCl<sub>3</sub>) of compound 8i

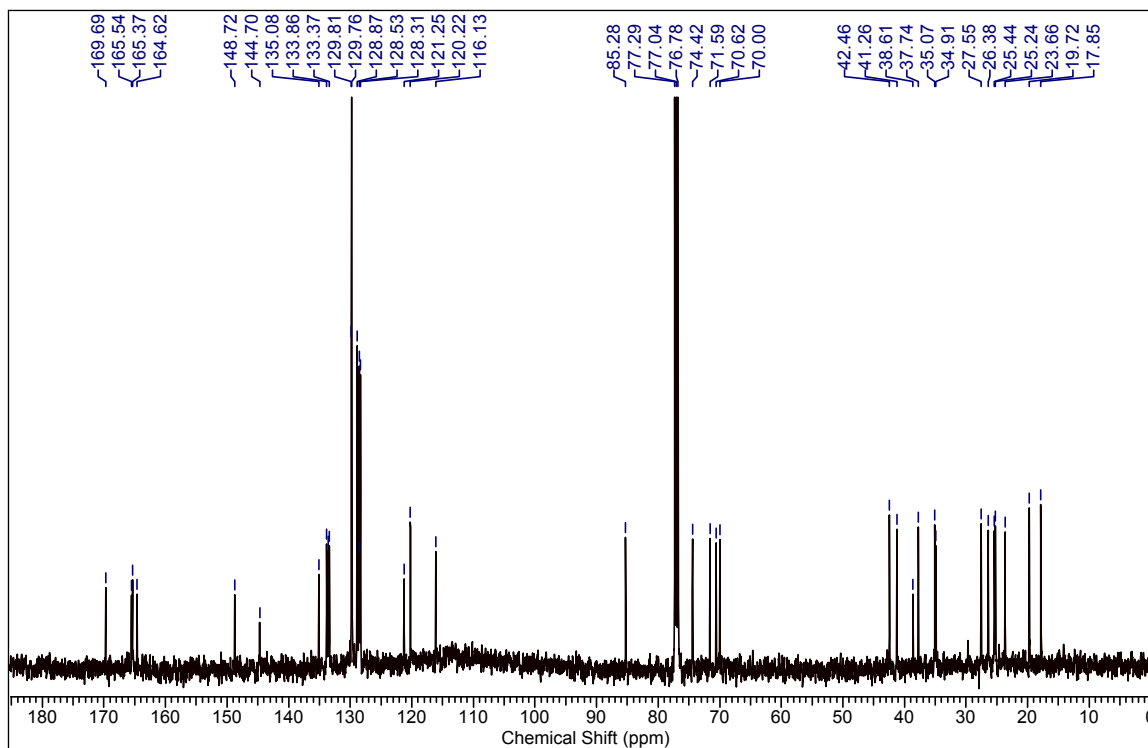

### HRMS of 8i

PA-7 #357 RT: 1.59 AV: 1 NL: 4.71E8  
T: FTMS + p ESI Full ms [100.0000-1500.0000]

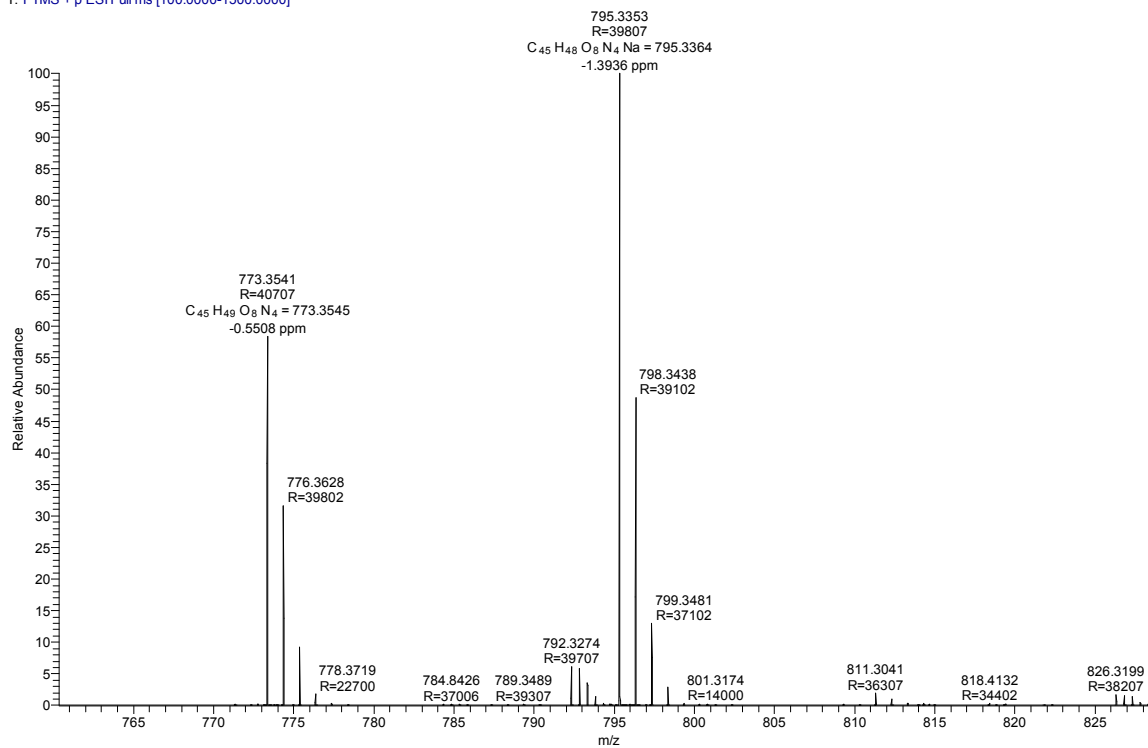

**<sup>1</sup>H NMR (400 MHz, CDCl<sub>3</sub>) of compound 8j**

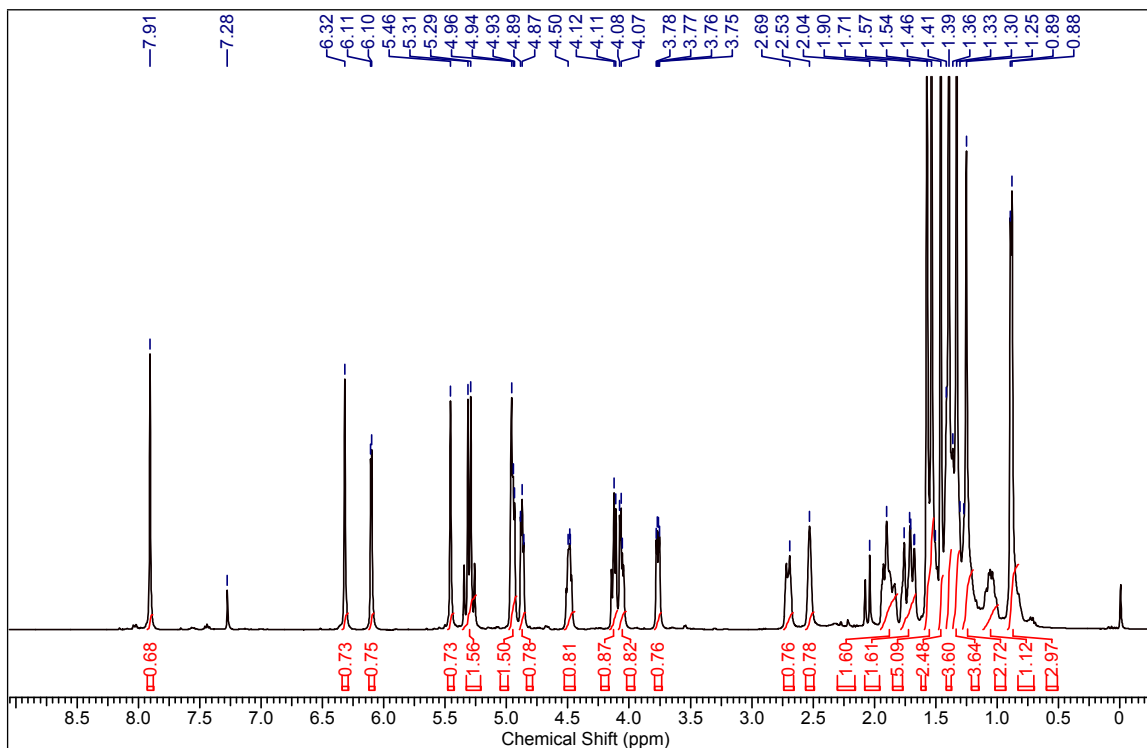

**<sup>13</sup>C NMR (100 MHz, CDCl<sub>3</sub>) of compound 8j**

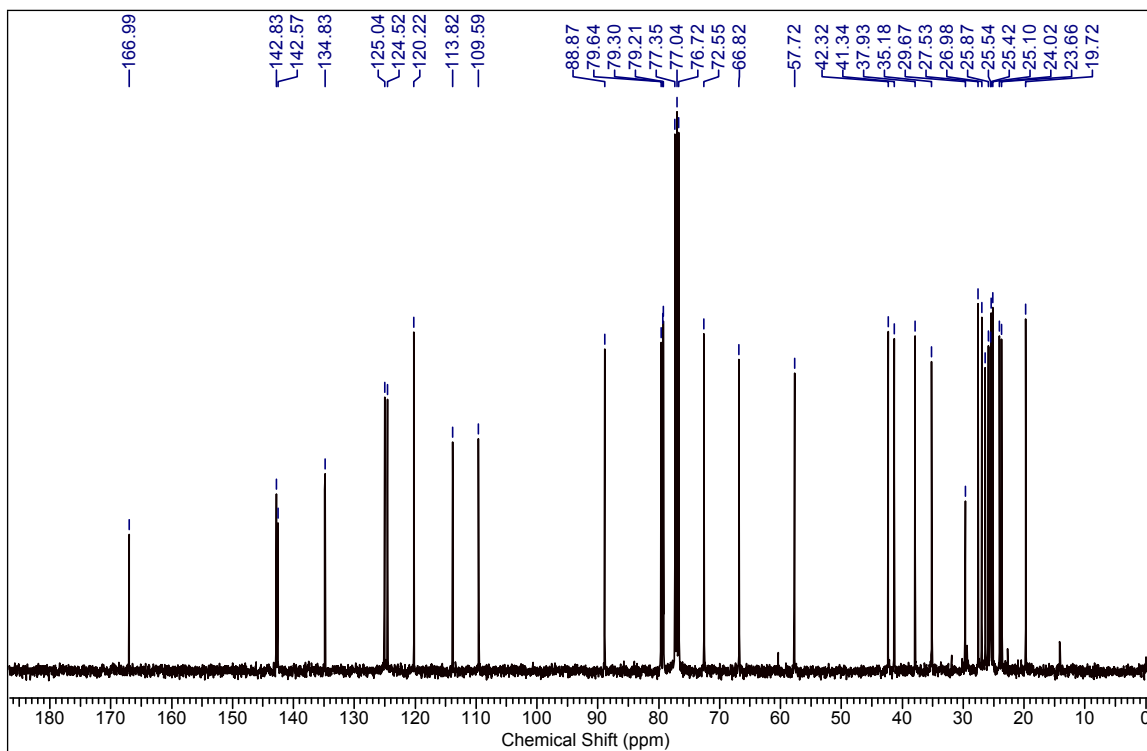

# HRMS of 8j

PA-8 #311 RT: 1.39 AV: 1 NL: 1.07E9  
T: FTMS + p ESI Full ms [100.0000-1500.0000]

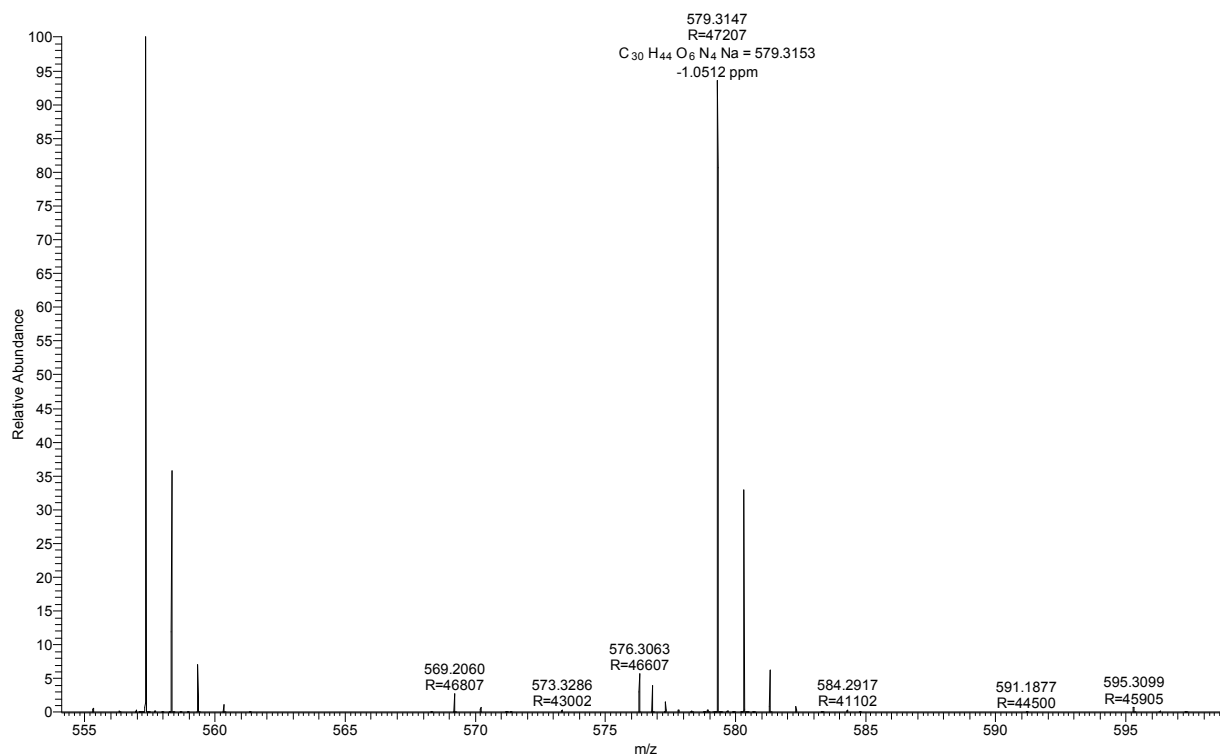

# <sup>1</sup>H NMR (400 MHz, CDCl<sub>3</sub>) of compound 8k

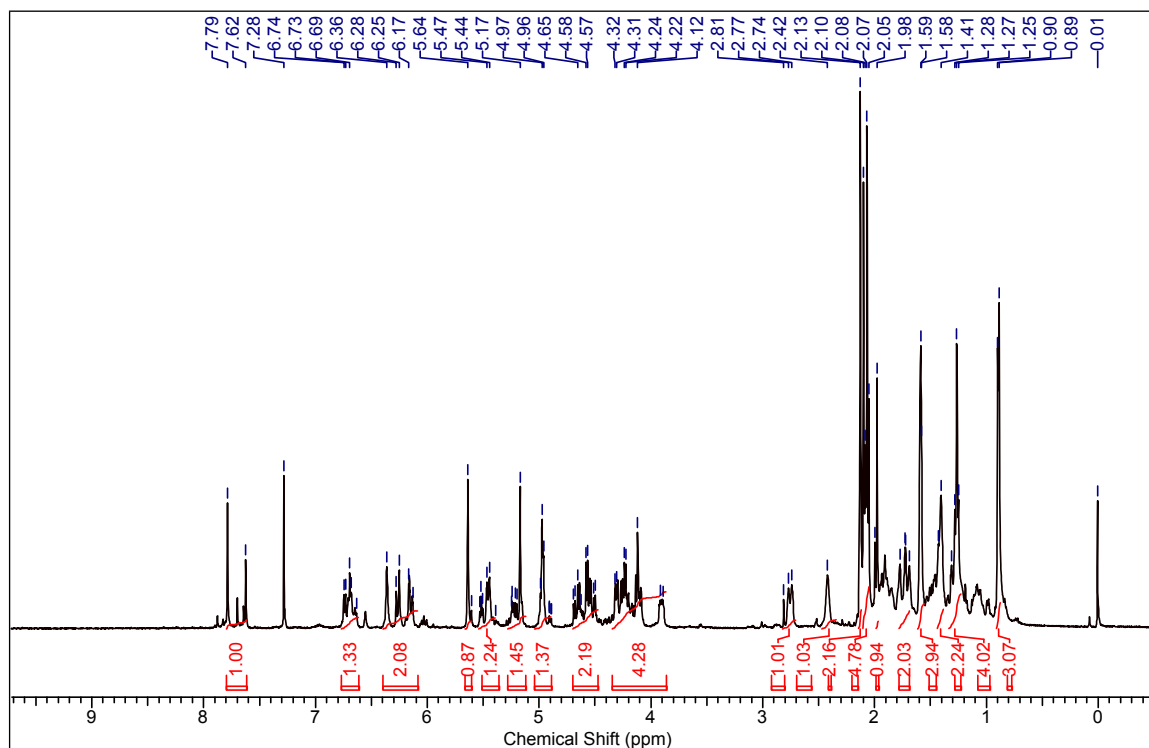

### <sup>13</sup>C NMR (100 MHz, CDCl<sub>3</sub>) of compound 8k

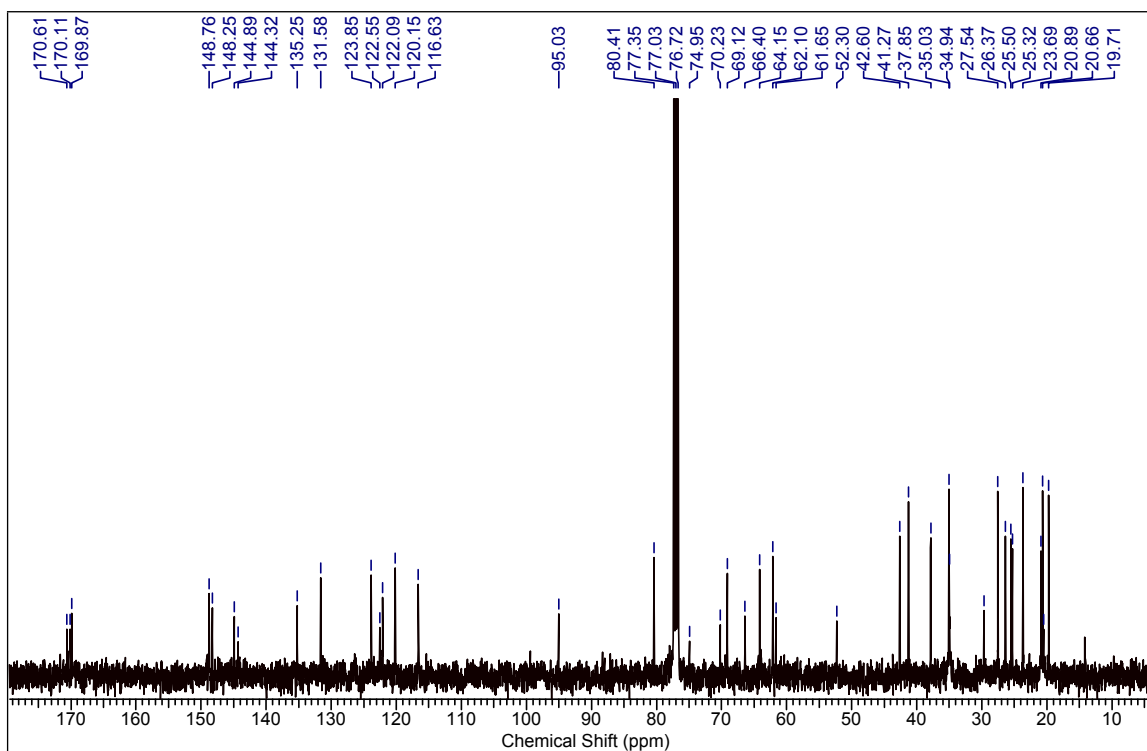

### HRMS of 8k

KTK-PA-11 #140 RT: 0.62 AV: 1 NL: 3.85E9  
T: FTMS + p ESIFull.ms [100.00-1500.00]

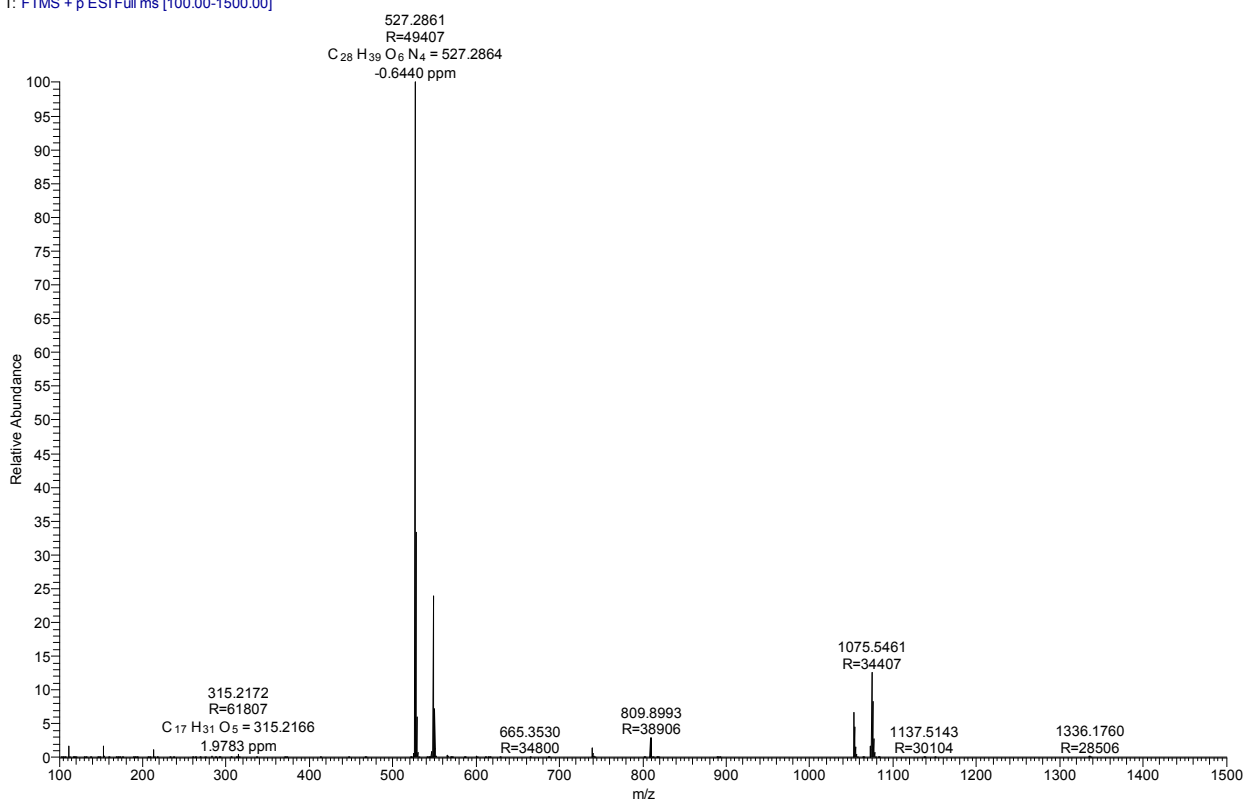

**<sup>1</sup>H NMR (500 MHz, CDCl<sub>3</sub>) of Compound 10**

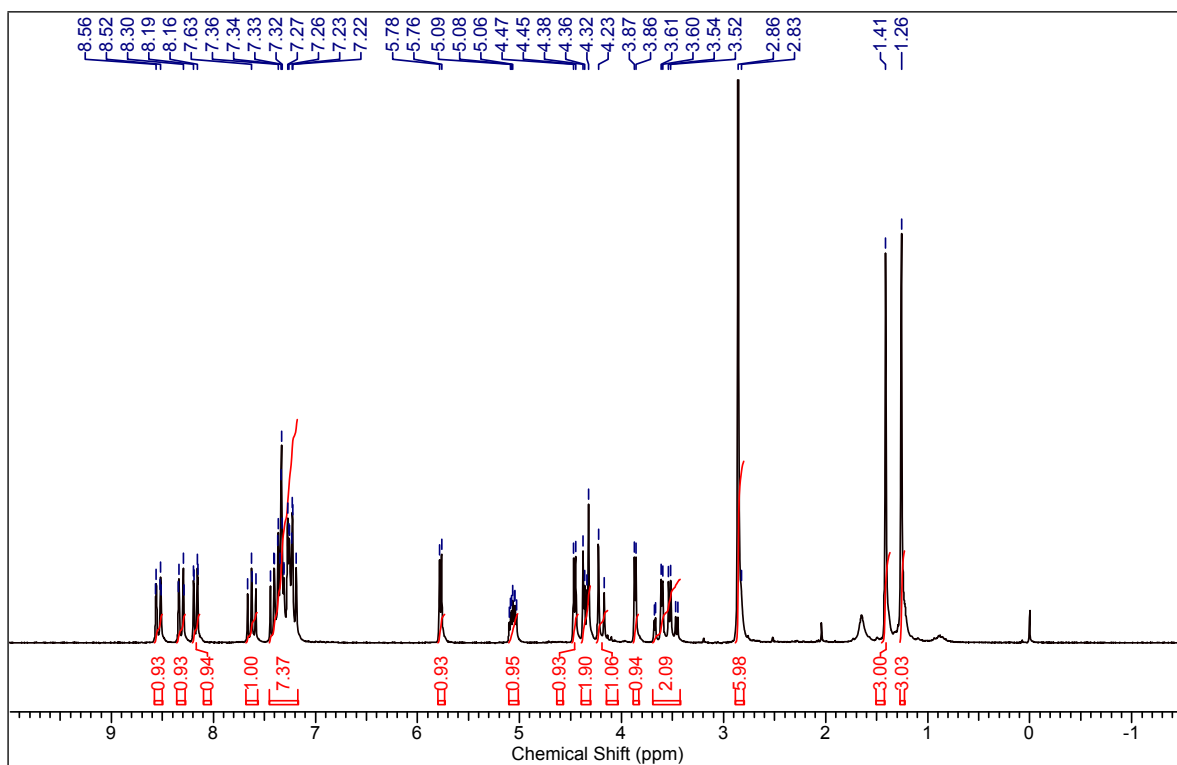

**<sup>13</sup>C NMR (125 MHz, CDCl<sub>3</sub>) of compound 10**

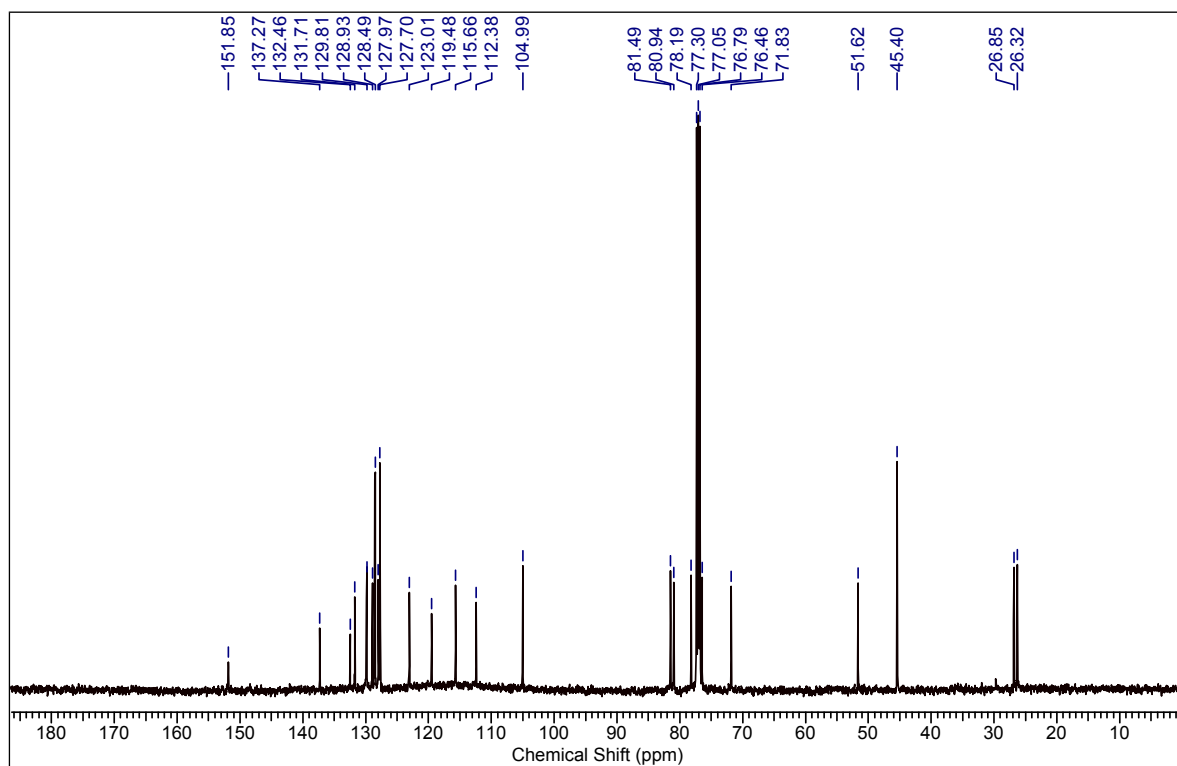

# HRMS of 10

DAN-P-1\_180110152809 #305 RT: 1.36 AV: 1 NL: 2.72E9  
T: FTMS + p ESI Full ms [100.0000-1500.0000]

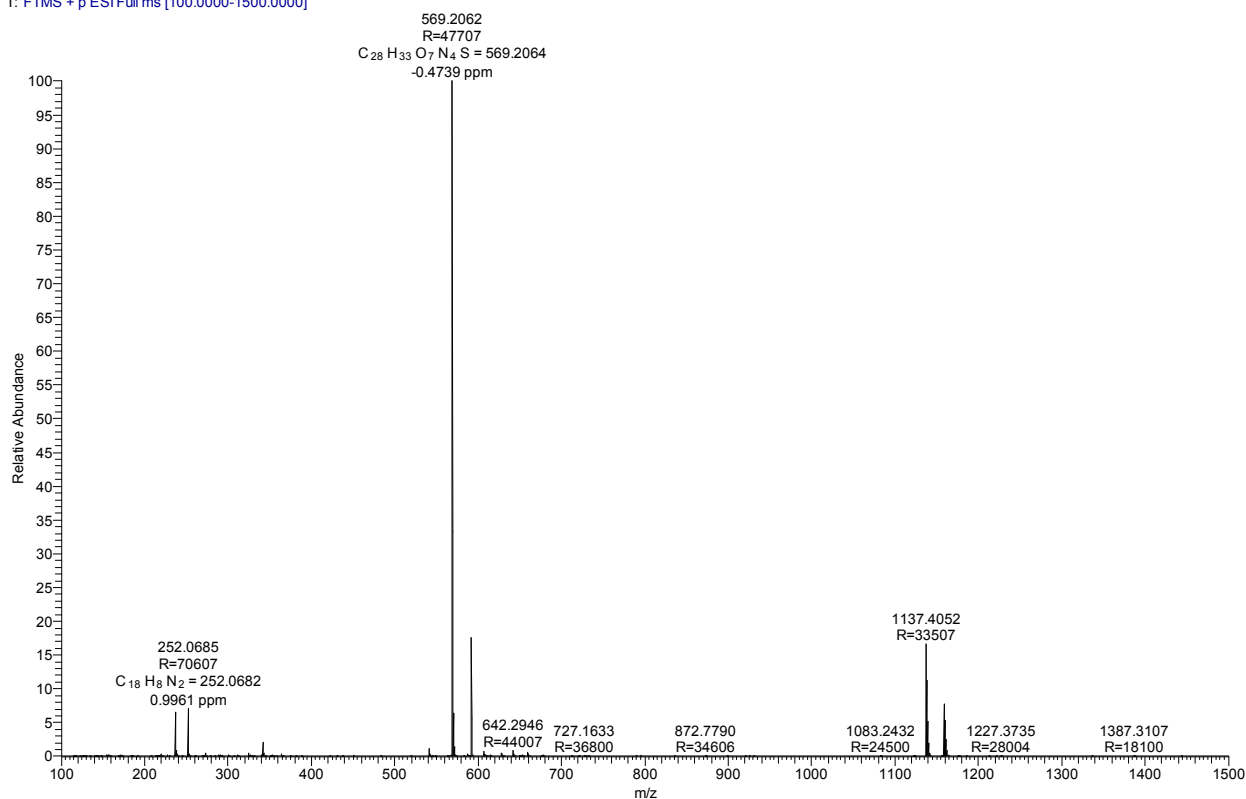

## <sup>1</sup>H NMR (400 MHz, CDCl<sub>3</sub>) of compound 11

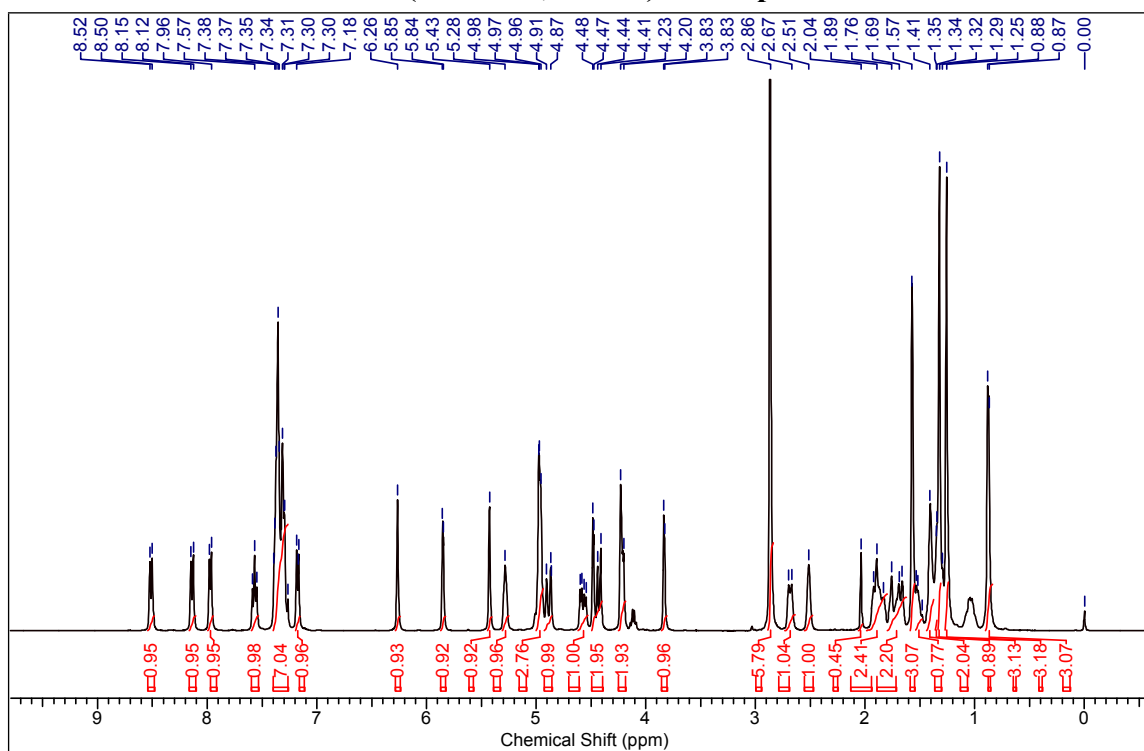

### <sup>13</sup>C NMR (100 MHz, CDCl<sub>3</sub>) of compound 11

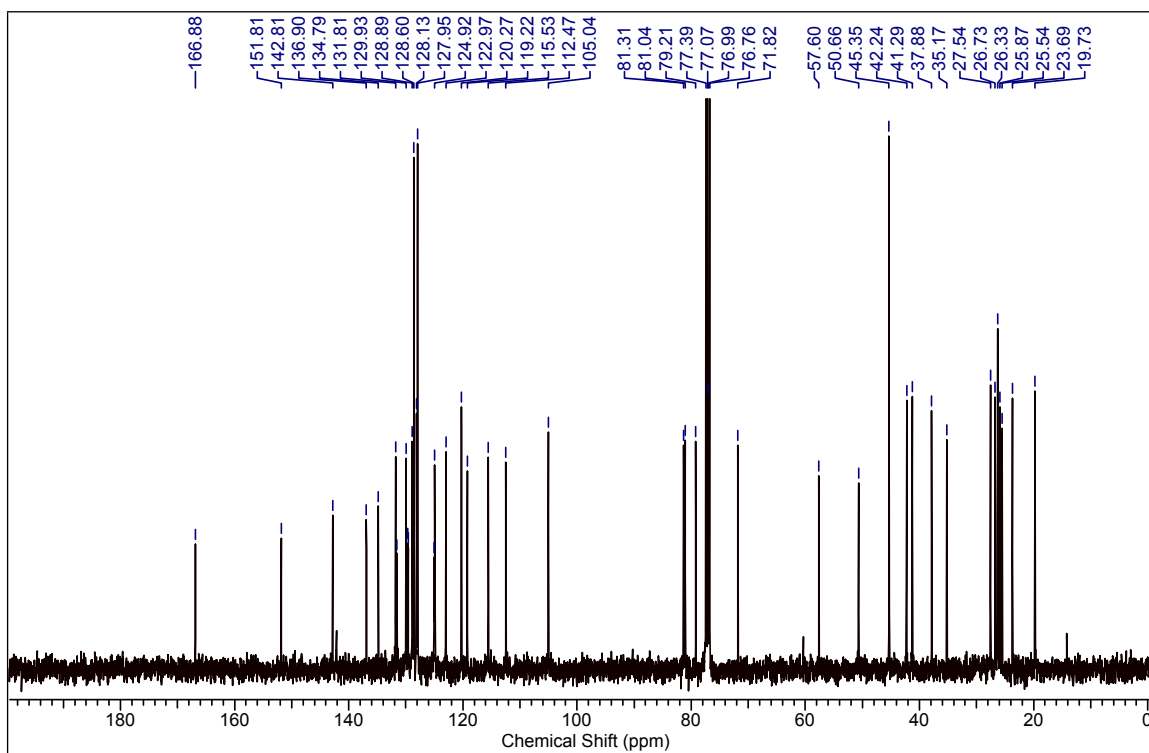

### HRMS of 11

AA-D #462 RT: 2.07 AV: 1 NL: 9.58E8  
T: FTMS + p ESI Full ms [100.0000-1500.0000]

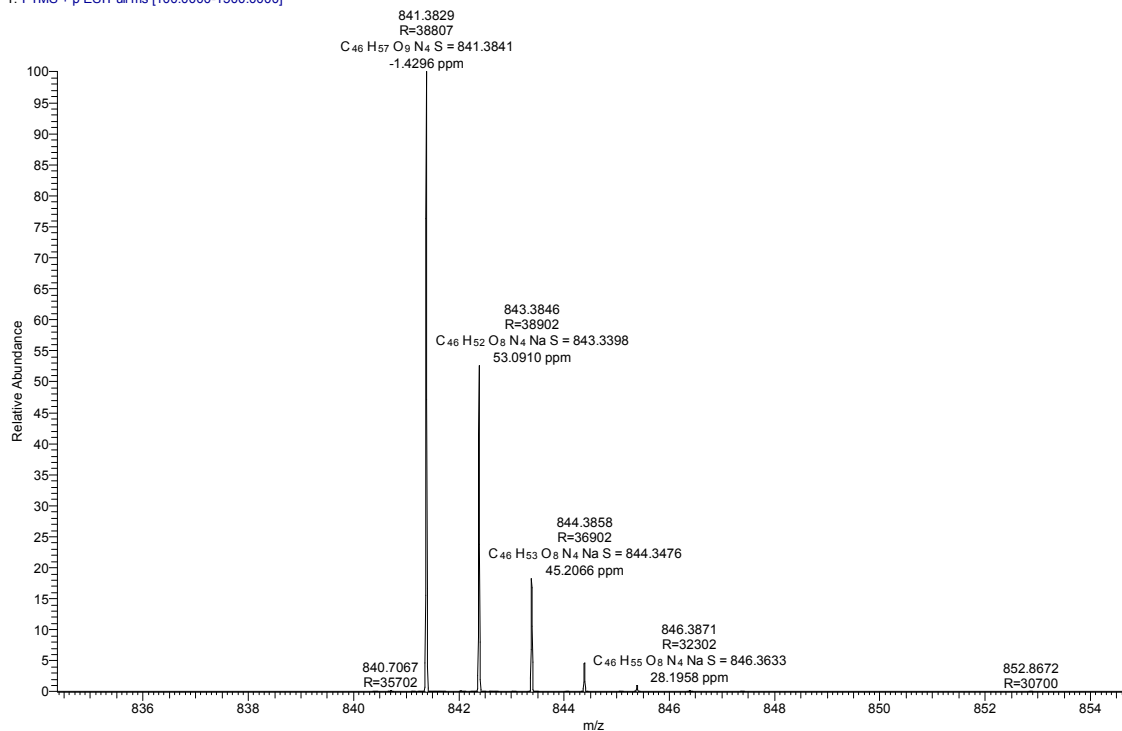



### <sup>1</sup>H NMR (400 MHz, CDCl<sub>3</sub>) of compound 12

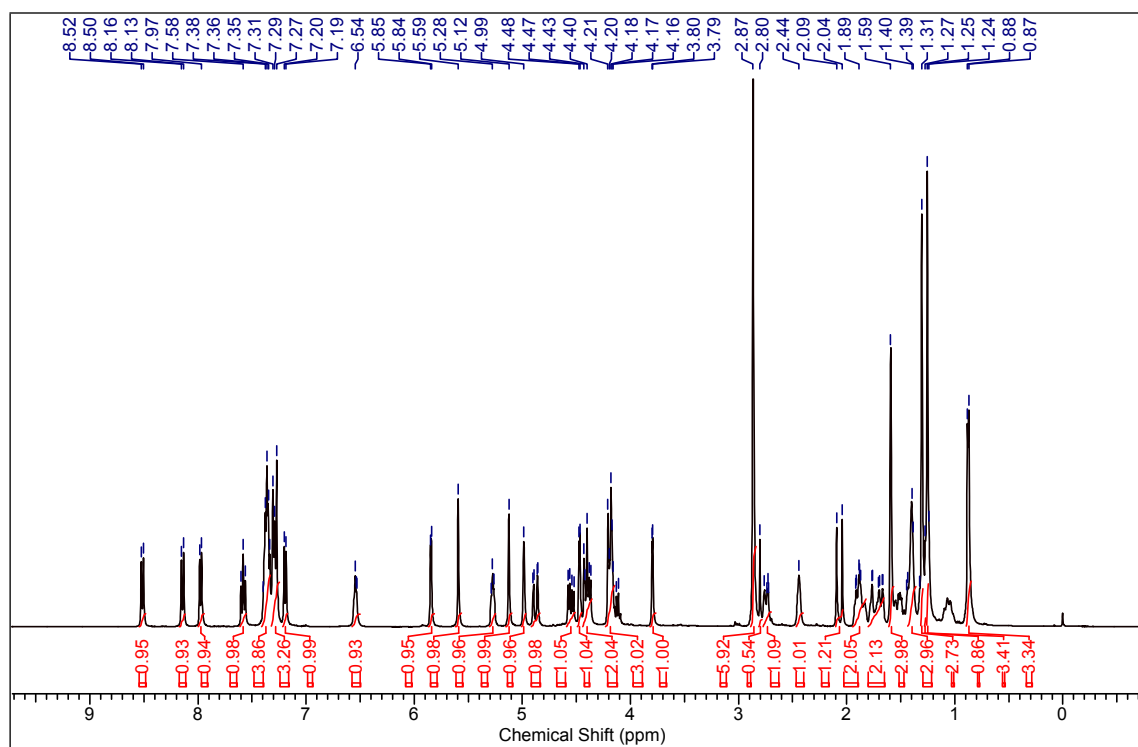

### <sup>13</sup>C NMR (100 MHz, CDCl<sub>3</sub>) of compound 12

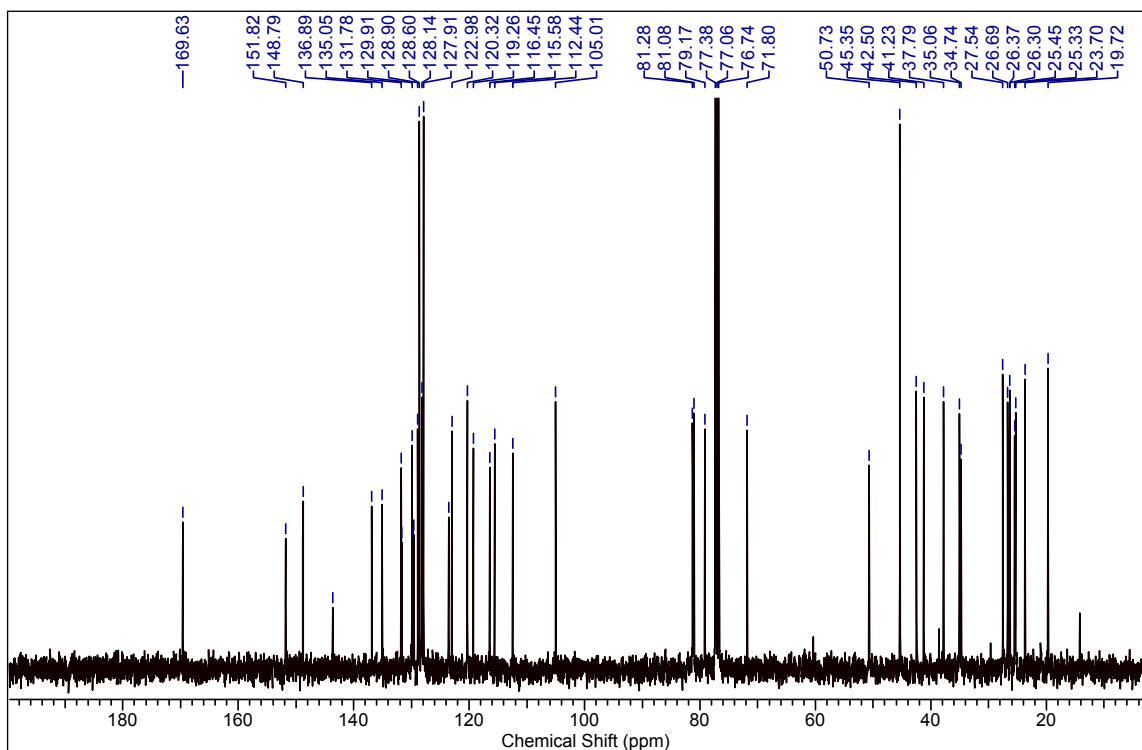

# HRMS of 12

PA-D #367 RT: 1.63 AV: 1 NL: 1.19E9  
T: FTMS + p ESI Full ms [100.0000-1500.0000]

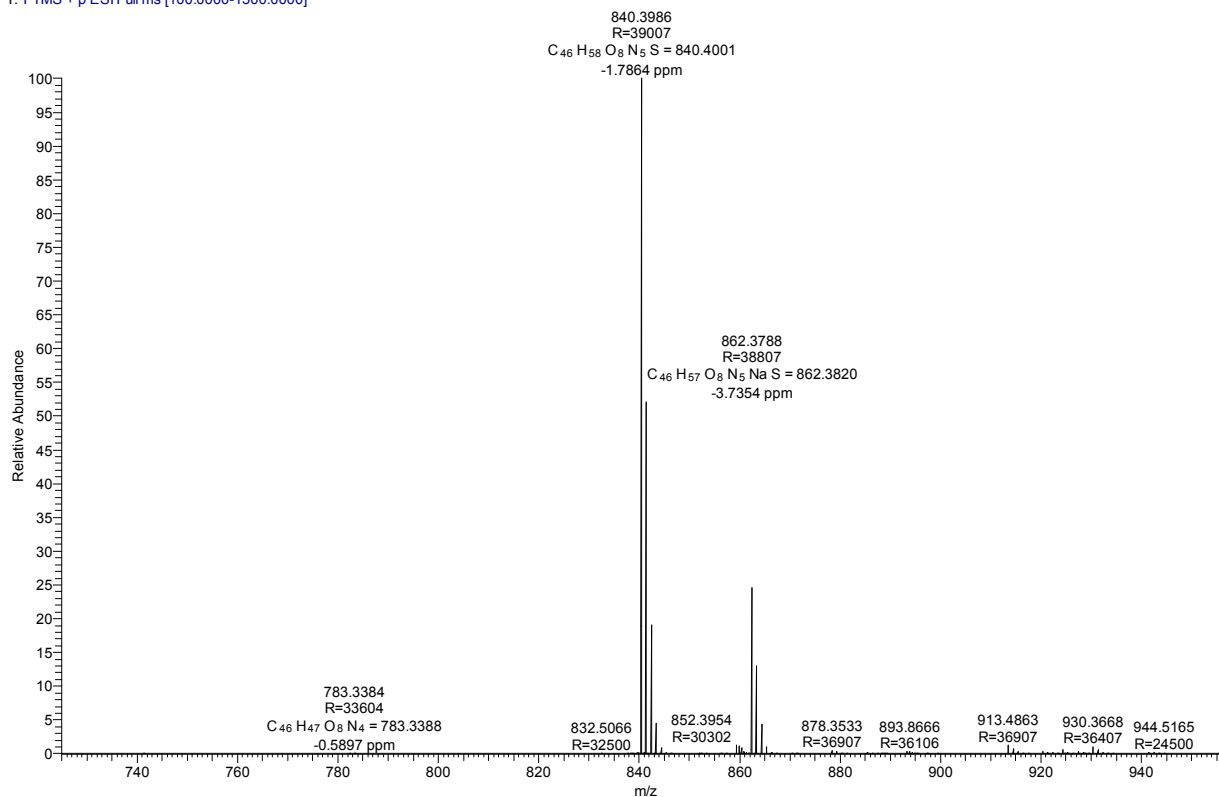

Supplement: d0ob00216j1.pdf [file d0ob00216j1.pdf]
